# Supplementary material
Source: ML conference proceedings conference paper supplement (https://proceedings.neurips.cc/paper_files/paper/2020/hash/4dbf29d90d5780cab50897fb955e4373-Abstract.html)
Supplement: Supplementary file [file 4dbf29d90d5780cab50897fb955e4373-Supplemental.pdf]

---

# Profile Entropy: A Fundamental Measure for the Learnability and Compressibility of Distributions

---

Yi Hao , Alon Orlitsky

Department of Electrical and Computer Engineering  
University of California, San Diego  
{yih179, aorlitsky}@eng.ucsd.edu

## Abstract

The profile of a sample is the multiset of its symbol frequencies. We show that for samples of discrete distributions, profile entropy is a fundamental measure unifying the concepts of estimation, inference, and compression. Specifically, profile entropy: a) determines the speed of estimating the distribution relative to the best natural estimator; b) characterizes the rate of inferring all symmetric properties compared with the best estimator over any label-invariant distribution collection; c) serves as the limit of profile compression, for which we derive optimal near-linear-time block and sequential algorithms. To further our understanding of profile entropy, we investigate its attributes, provide algorithms for approximating its value, and determine its magnitude for numerous structural distribution families.

## Contents

|          |                                                                  |           |
|----------|------------------------------------------------------------------|-----------|
| <b>1</b> | <b>Introduction</b>                                              | <b>2</b>  |
| <b>2</b> | <b>Main Results</b>                                              | <b>3</b>  |
| 2.1      | Dimension-Entropy Equivalence of Profiles . . . . .              | 4         |
| 2.2      | Competitive (Instance-Optimal) Distribution Estimation . . . . . | 4         |
| 2.3      | Competitive-Optimal Property Inference . . . . .                 | 6         |
| 2.4      | Optimal Compression of Profiles . . . . .                        | 7         |
| 2.5      | Optimal Characterization for Structured Families . . . . .       | 8         |
| <b>3</b> | <b>Applications and Extensions</b>                               | <b>9</b>  |
| <b>4</b> | <b>Conclusion and Broader Impact</b>                             | <b>10</b> |
| <b>A</b> | <b>Entropy and Dimension of Sample Profiles</b>                  | <b>11</b> |
| A.1      | Concentration of Profile Dimension . . . . .                     | 11        |
| A.2      | Theorem 1: Dimension-Entropy Equivalence . . . . .               | 14        |
| A.3      | Proof of Theorem 1 . . . . .                                     | 14        |
| A.4      | Extension: Profile Entropy Estimation via Monotonicity . . . . . | 24        |
| A.5      | Extension: Lipschitzness of Profile Entropy . . . . .            | 25        |

|          |                                                                  |           |
|----------|------------------------------------------------------------------|-----------|
| <b>B</b> | <b>Competitive-Optimal Property Inference</b>                    | <b>26</b> |
| B.1      | Theorem 3: Sufficiency of Profiles . . . . .                     | 26        |
| B.2      | Theorem 4: Competitiveness of PML . . . . .                      | 28        |
| B.3      | Prior Work and Discussions . . . . .                             | 28        |
| B.4      | Proof of Theorem 4 . . . . .                                     | 30        |
| B.5      | Experiments . . . . .                                            | 32        |
| <b>C</b> | <b>Competitive Estimation of Distributions and Their Entropy</b> | <b>33</b> |
| C.1      | Theorem 2: Competitive Distribution Estimation . . . . .         | 33        |
| C.2      | Proof of Theorem 2 . . . . .                                     | 34        |
| C.3      | Extension: Competitive Entropy Estimation . . . . .              | 35        |
| C.4      | Experiments . . . . .                                            | 37        |
| <b>D</b> | <b>Optimal Characterization for Structured Families</b>          | <b>39</b> |
| D.1      | Theorem 6: Log-Concave Family . . . . .                          | 39        |
| D.2      | Proof of Theorem 6 and 14 . . . . .                              | 39        |
| D.3      | Theorem 7: Power-Law Family . . . . .                            | 43        |
| D.4      | Proof of Theorem 7 . . . . .                                     | 43        |
| D.5      | Theorem 8: Histogram Family . . . . .                            | 45        |
| D.6      | Proof of Theorem 8 . . . . .                                     | 45        |
| <b>E</b> | <b>Extensions</b>                                                | <b>46</b> |
| E.1      | Multi-Dimensional Profiles . . . . .                             | 46        |
| E.2      | Discrete Multivariate Gaussian Mixtures . . . . .                | 47        |

## 1 Introduction

Recent research in statistical machine learning, ranging from neural-network training and online learning, to density estimation and property testing, has advanced evaluation criteria beyond worst-case analysis. New performance measures apply more refined metrics relating the algorithm’s accuracy and efficiency to the problem’s inherent structure.

Consider for example learning an unknown discrete distribution from its i.i.d. samples (see also Section 2.2). The classical worst-case analysis states that in the worst case, the number of samples required to estimate a distribution to a given KL-divergence grows linearly in the alphabet size.

However, this formulation is pessimistic, since distributions are rarely the worst possible, and many practical distributions can be estimated with significantly smaller samples. Furthermore, once the sample is drawn, it reveals the distribution’s complexity and hence the hardness of the learning task.

Going beyond worst-case analysis, one can design an *adaptive* learning algorithm whose theoretical guarantees vary according to the problem’s simplicity. For example, [Orlitsky and Suresh \[2015\]](#) recently proposed an estimator that instance-by-instance achieves nearly the same performance as a genie algorithm designed with prior knowledge of the underlying distribution.

We introduce *profile entropy*, a fundamental measure for the complexity of discrete distributions, and show that it connects three vital scientific tasks: estimation, inference, and compression. The resulting algorithms have guarantees directly relating to the sample profile entropy, hence also adapt to the intrinsic simplicity of the tasks at hand.

The next subsection formalizes relevant concepts and useful notation.

## Sample Profiles and Their Entropy

Consider an arbitrary sequence  $x^n$  over a finite or countably infinite alphabet  $\mathcal{X}$ . The *multiplicity*  $\mu_y(x^n)$  of a symbol  $y \in \mathcal{X}$  is the number of times  $y$  appears in  $x^n$ . The *prevalence* of an integer  $\mu$  is the number  $\varphi_\mu(x^n)$  of symbols in  $x^n$  with multiplicity  $\mu$ . The *profile* of  $x^n$  is the multiset  $\varphi(x^n)$  of multiplicities of the symbols in  $x^n$ . We refer to it as a profile of *length*  $n$ . For example, consider the sequence  $x^7 = \text{bananas}$ , in which  $a$  appears thrice,  $n$  appears twice, and  $b$  and  $s$  each appears once. Then, the profile of the sequence is multiset  $\varphi(x^7) = \{3, 2, 1, 1\}$ .

The number  $\mathcal{D}(S)$  of distinct elements in a multiset  $S$  is its *dimension*. For convenience, we also write  $\mathcal{D}(x^n)$  for profile dimension. In the above example, we have  $\mathcal{D}(x^7) = \mathcal{D}(\varphi(x^7)) = 3$ , corresponding to values 1, 2, and 3. The dimension of a length- $n$  profile over  $\mathcal{X}$  is at most  $\min\{\sqrt{2n}, |\mathcal{X}|\}$ . In general, the profile entropy  $\mathcal{H}_n(p)$  is no more than  $3\sqrt{n}$ .

Let  $\Delta$  be the collection of all discrete distributions, and  $\Delta_{\mathcal{X}}$  be the collection of those over  $\mathcal{X}$ . Draw a size- $n$  sample  $X^n$  from an arbitrary distribution in  $p \in \Delta$ . Then, the profile  $\Phi^n$  of  $X^n$  is a random multiset whose distribution depends on only  $p$  and  $n$ . We therefore write  $\Phi^n \sim p$ , and call  $\mathcal{H}_n(p) := H(\Phi^n)$  the *profile entropy* with respect to  $(p, n)$ . For example, if we draw a sample of size  $n = 3$  from  $p = (\frac{1}{2}, \frac{1}{2})$ , then profiles  $\{1, 1, 1\}$ ,  $\{2, 1\}$ , and  $\{3\}$  appear with probabilities  $0$ ,  $\frac{3}{4}$ , and  $\frac{1}{4}$ , respectively. And the profile entropy is thus  $\mathcal{H}_3(\frac{1}{2}, \frac{1}{2}) = H(0, \frac{3}{4}, \frac{1}{4}) \approx 0.56$ .

Analogously, we call  $\mathcal{D}_n := \mathcal{D}(\Phi^n)$ , the *profile dimension* associated with  $(p, n)$ , and write  $\mathcal{D}_n \sim p$ .

For notational simplicity, we will assume that  $\mathcal{H}_n(p) \geq 1$  throughout the paper, and respectively write  $a \simeq b$ ,  $a \gtrsim b$ , and  $a \lesssim b$  instead of  $a = \tilde{\Theta}(b)$ ,  $a = \tilde{\Omega}(b)$ , and  $a = \tilde{O}(b)$ , where the asymptotic notation hides logarithmic factors of  $n$ .

## Applications of Sample Profiles

Sample profiles have essential applications in numerous aspects of scientific research, ranging from property inference to the study of degree distributions of networks/graphs.

*Property inference* As Section 2.3 shows, profiles are sufficient for inferring all symmetric properties, such as entropy, Rényi entropy, and support size, not only in the sense of sufficient statistics, but also in the sense of Theorem 3, stating that profile-based estimators are as good as any others.

*Distribution learning* The entropy of a sample profile, equaling its dimension in order with high probability (Theorem 1), directly characterizes how well we can estimate a distribution and approach the performance of the best human-designed estimator (Theorem 2), for every distribution.

*Theory of long tail* The notable long tail theory in economics [Anderson, 2006] describes the strategy of selling a large number of different items that each sells in relatively small quantities. The profile of the product selling data, and the induced (PML) probability multiset estimate (Section 2.3), accurately characterize the tail shape of the data, and that of the underlying distribution, respectively.

*Password frequency lists* In the research of password defense, it is vital to understand the distribution of passwords. Due to security concerns, organizations typically do not publish the complete data displaying each password and its frequency. Instead, they reveal the anonymized list of password frequencies, with each password hashed or replaced by some dummy string, which is equivalent to showing the password data's profile.

*Degree distributions of networks* Degree distribution is one of the most widely studied attributes of networks (and graphs) that describes the fractions of nodes with different degrees. As the degree distribution ignores symbol labeling and focuses only on the frequency of each degree, it is equivalent to the profile of the node degree data.

## 2 Main Results

This paper aims to provide a thorough theory of profile entropy. Most of the results either are the first of their kind or significantly improve the state-of-the-art.

Specifically, Section 2.1 presents the fundamental equivalence relation between profile dimension and entropy (Thm. 1). Building on the equivalence, we respectively establish essential connections

between profile entropy and the estimation of discrete distributions (Section 2.2; Thm. 2), inference of their properties (Section 2.3; Thm. 4), and compression of sample profiles (Section 2.4; Thm. 5). These results characterize how well one can compete with an instance-optimal algorithm for each task, over *every single distribution*. For a real sense of how profile entropy behaves, Section 2.5 ultimately determines its magnitude for three prominent structural distribution families, log-concave (Thm. 6), power-law (Thm. 7), and histogram (Thm. 8). Going even further, Section 3 presents several additional applications and extensions of our theory and results, including robust learning under domain symbol permutations, profile entropy for mixture models, competitive property estimation, adaptive testing and classification, and connection to the method of types.

For space considerations, we relegate detailed reviews on related work, most technical proofs, and numerical experiments to the *supplementary material*.

## 2.1 Dimension-Entropy Equivalence of Profiles

The following theorem shows that for every distribution and sampling parameter  $n$ , the induced profile entropy and dimension are of the same order, with high probability.

**Theorem 1** (Entropy-dimension equivalence). *For any distribution  $p \in \Delta$  and  $\mathcal{D}_n \sim p$ ,*

$$\Pr(\mathcal{D}_n \simeq \mathcal{H}_n(p)) \geq 1 - \frac{1}{\sqrt{n}}.$$

We briefly comment on Theorem 1.

First, the theorem reveals a novel and fundamental relation between profile dimension and entropy. The relation also yields an intrinsic method to approximate the entropy of the sample’s profile, a fairly involved functional, by only counting its dimension. In general, the number of possible length- $n$  profiles of a distribution could be as large the number of partitions of integer  $n$ , and grows with  $n$  at a sub-exponential speed. Hence, even if  $p$  is known, computing the exact value of  $\mathcal{H}_n(p)$  could be hard. On the other hand, if one applies our theorem to approximate  $\mathcal{H}_n(p)$ , we only need to draw a sample  $X^n \sim p$ , and find its profile dimension, which is computable in linear time through counting. Appendix A.4 further illustrates how to estimate  $\mathcal{H}_n$  with  $m \ll n$  observations.

Second, the theorem serves as an essential building block for the subsequent results on distribution estimation, property inference, and profile compression, and enables us to establish their optimality. For example, in the process of deriving the optimal profile compression scheme and proving Theorem 5, we reason with  $\mathcal{D}_n$  to bound the space of storing the profile, and utilize  $\mathcal{H}_n(p)$  as an essential lower bound for lossless compression.

Third, despite the simple form of the theorem, the proof of this result is highly nontrivial, and relies on a recent breakthrough in solving the Shepp-Olkin monotonicity conjecture [Hillion et al., 2019], which asserts that the entropy of a Poisson-binomial random variable is monotone in the defining success probabilities, over a hypercube near the origin.

## 2.2 Competitive (Instance-Optimal) Distribution Estimation

Estimating distributions from their samples is a statistical-inference cornerstone, and has numerous applications, ranging from biological studies [Armañanzas et al., 2008] to language modeling [Chen and Goodman, 1999]. A learning algorithm  $\hat{p}$  in this setting is called a *distribution estimator*, which associates with every sequence  $x^n$  a distribution  $\hat{p}(x^n) \in \Delta$ . Given a sample  $X^n \sim p$ , we measure the performance of  $\hat{p}$  in estimating distribution  $p$  by the Kullback-Leibler (KL) divergence  $D(p \parallel \hat{p}(X^n))$ .

Let  $r_n(p, \hat{p}) := \min\{r : \Pr(D(p \parallel \hat{p}(X^n)) \leq r) \geq 9/10\}$  be the *minimal KL error*  $\hat{p}$  could achieve with probability at least 9/10. Then, the *worst-case error* of estimator  $\hat{p}$  over  $\mathcal{P} \subseteq \Delta$  is  $r_n(\mathcal{P}, \hat{p}) := \max_{p \in \mathcal{P}} r_n(p, \hat{p})$ , and the lowest worst-case error for  $\mathcal{P}$ , achieved by the optimal estimator, is the *minimax error*  $r_n(\mathcal{P}) := \min_{\hat{p}'} r_n(\mathcal{P}, \hat{p}')$ . The most widely studied distribution set  $\mathcal{P}$  is simply  $\Delta_{\mathcal{X}}$ . With  $\mathcal{X}$  being finite, it has become a classical result that  $r_n(\Delta_{\mathcal{X}}) = \Theta(|\mathcal{X}|/n)$ , which is achievable, up to constant factors, by an add-constant estimator [Braess and Sauer, 2004, Kamath et al., 2015].

**Beyond minimax** Despite being minimax optimal, the  $|\mathcal{X}|/n$ -result and the algorithm, are not satisfiable from a practical point of view. The reason is that the formulation puts much of its emphasis on the worst-case performance, and ignores the intrinsic simplicity of  $p$  in a pessimistic fashion.

Hence, the desire to design more efficient estimators for practical distributions, like power-law, or Poisson, has led to algorithms that possess adaptive estimation guarantees.

Concretely, the minimax formulation has two modifiable components – the collection  $\mathcal{P}$  and the error function  $D$ . A common approach to specifying  $\mathcal{P}$  is adding structural assumptions, such as monotonicity,  $m$ -modality, and log-concavity, which, in many cases, makes algorithm refinement possible by leveraging structural simplicity. An orthogonal approach to encouraging adaptability without imposing structures is to replace absolute error by relative error, which we illustrate below.

**Competitive estimation** Without strong prior knowledge on the underlying distribution, a reasonable estimator should *naturally* assign the same probability to symbols appearing an equal number of times. *Competitive estimation* calls for finding a universally near-optimal estimator that learns *every* distribution as well as the best natural estimator that knows the true distribution.

Denote by  $\mathcal{N}$  the collection of all natural estimators. For any distribution  $p \in \Delta$  and sample  $X^n \sim p$ , a given estimator  $\hat{p}$  incurs, with respect to the best natural estimator knowing  $p$ , an instance-by-instance *relative KL error* of

$$D_{\text{nat}}(p \parallel \hat{p}(X^n)) := D(p \parallel \hat{p}(X^n)) - \min_{\hat{q} \in \mathcal{N}} D(p \parallel \hat{q}(X^n)).$$

Analogous to the minimax formulation, we denote by  $r_n^{\text{nat}}(p, \hat{p}) := \min\{r : \Pr(D_{\text{nat}}(p \parallel \hat{p}(X^n)) \leq r) \geq 9/10\}$  the *minimal relative error*  $\hat{p}$  achieves with probability at least 9/10, by  $r_n^{\text{nat}}(\mathcal{P}, \hat{p})$  the *worst-case relative error* of  $\hat{p}$  over  $\mathcal{P} \subseteq \Delta$ , and by  $r_n^{\text{nat}}(\mathcal{P})$  the *minimax relative error*.

**Old and new results** Initiating the competitive formulation, [Orlitsky and Suresh \[2015\]](#) show that a simple variant of the well-known Good-Turing estimator achieves  $r_n^{\text{nat}}(\Delta) \lesssim 1/n^{1/3}$ , and a more involved estimator in [Acharya et al. \[2013\]](#) attains the optimal  $r_n^{\text{nat}}(\Delta) \simeq 1/\sqrt{n}$ . For a fully adaptive guarantee, [Hao and Orlitsky \[2019b\]](#) further refine the bound and design an estimator  $\hat{p}^*$  achieving  $r_n^{\text{nat}}(p, \hat{p}^*) \lesssim \mathbb{E}_{\mathcal{D}_n \sim p}[\mathcal{D}_n/n] \lesssim r_n^{\text{nat}}(\Delta)$ , for every  $p \in \Delta$ , but provide no lower bounds.

In this work, we completely characterize  $r_n^{\text{nat}}(p, \cdot)$  with essentially matching lower and upper bounds. Surprisingly, we show that for nearly every sample size  $n$ , the quantity behaves like  $\mathcal{H}_n(p)/n$ .

**Theorem 2** (Optimal competitive error). *There is a near-linear-time computable estimator  $\hat{p}^*$ , such that for any distribution  $p$  and  $n$ ,*

$$r_n^{\text{nat}}(p, \hat{p}^*) \lesssim \frac{\mathcal{H}_n(p)}{n},$$

where  $\hat{p}^*$  is the near linear-time computable estimator in [Hao and Orlitsky \[2019b\]](#) mentioned above. On the other hand, for any  $H \in [0, \sqrt{n})$ ,

$$\min_{\hat{p}} \max_{p: \mathcal{H}_n(p) \leq H} r_n^{\text{nat}}(p, \hat{p}) \gtrsim \frac{H}{n}.$$

First, we comment on the lower bound. Due to the classical minimax formulation, one might expect a lower bound in one of the following two forms – for every  $\hat{p}$ ,  $r_n^{\text{nat}}(p, \hat{p}) \gtrsim \mathcal{H}_n(p)/n$  for 1) some  $p$  or 2) every  $p$ . Form 1) turns out to be weak under the competitive formulation. Specifically, let  $p$  be a *trivial distribution* that assigns probability 1 to some symbol. Then, both the profile entropy and the error of the best natural estimator are zero, and the inequality trivially holds for every  $\hat{p}$ . Form 2), on the other hand, is purely impossible. Specifically, for every distribution  $p$ , one can set  $\hat{p}$  to be best natural estimator, which leads to a relative error of zero, greater than  $\mathcal{H}_n(p)/n$  unless  $p$  is trivial.

Second, we illustrate the significance of the result. The notable work of [Hardy and Ramanujan \[1918\]](#) shows that the number of integer partitions of  $n$ , which equals the number of length- $n$  profiles, is at most  $\exp(3\sqrt{n})$ , implying that  $\mathcal{H}_n(p) \leq 3\sqrt{n}$  for any  $p \in \Delta$ . Therefore, the  $\mathcal{H}_n(p)/n$  upper and lower bounds in the theorem yields  $r_n^{\text{nat}}(\Delta) \simeq 1/\sqrt{n}$ , recovering the main result of [Orlitsky and Suresh \[2015\]](#). Besides set  $\Delta$ , the theorem and its proof also imply nearly tight minimax relative-error bounds on numerous distribution sets  $\mathcal{P}$ . Below, we present two results that fall into this category. In both cases, the minimax relative error is much lower than  $1/\sqrt{n}$  if the parameter involved is  $o(\sqrt{n})$ .

The first example addresses the set  $\Delta_H$  of distributions whose  $n$ -sample profile entropy is  $H$ .

**Corollary 1.** *For any  $H \gtrsim 1$ , the minimax relative error over  $\Delta_H$  is  $r_n^{\text{nat}}(\Delta_H) \simeq H/n$ .*

For a more concrete example, denote by  $\mathcal{L}_\sigma$  the collection of log-concave distributions over  $\mathbb{Z}$  whose variance is  $\sigma^2$ . Then, [Theorem 2](#) and the profile entropy bounds in [Theorem 6](#) imply

**Corollary 2.** *For any  $1 \lesssim \sigma \leq \sqrt{n}$ , the minimax relative error over  $\mathcal{L}_\sigma$  is  $r_n^{\text{nat}}(\mathcal{L}_\sigma) \simeq \sigma/n$ .*

## 2.3 Competitive-Optimal Property Inference

Numerous practical applications call for inferring *property values* of an unknown distribution from its samples, including entropy for graphical modeling [Koller and Friedman, 2009], Rényi entropy for sequential decoding [Arikan, 1996], and support size for species richness estimation [Magurran, 2013]. Therefore, *property inference* has attracted considerable attention over the past few decades. For interested readers, please refer to Appendix B.3 for a detailed two-page review of prior works and discussions about relevant methods.

**Property inference** Formally, a *distribution property* over some collection  $P \subseteq \Delta$  is a functional  $f : P \rightarrow \mathbb{R}$  that associates with each distribution a real value. Given a sample  $X^n$  from an unknown distribution  $p \in P$ , the problem of interest is to infer the value of  $f(p)$ . For this purpose, we employ another functional  $\hat{f} : \mathcal{X}^* \rightarrow \mathbb{R}$ , an *estimator* mapping every sample to a real value. We measure the statistical efficiency of  $\hat{f}$  in approximating  $f$  over  $P$  by its *absolute error*  $|\hat{f}(X^n) - f(p)|$ .

Given  $X^n \sim p \in P$ , the *minimal absolute error rate*, or simply *error*, that  $\hat{f}$  achieves with probability at least  $9/10$  is  $r_n(p, \hat{f}) := \min\{r : \Pr(|\hat{f}(X^n) - f(p)| \leq r) \geq 9/10\}$ , where the dependence on  $f$  is *implicit*. While  $p$  is often unknown, the *worst-case error* of an estimator  $\hat{f}$  over all distributions in  $P$  is  $r_n(P, \hat{f}) := \max_{p \in P} r_n(p, \hat{f})$ , and the lowest worst-case error for  $P$ , achieved by the optimal estimator, is the *minimax error*  $r_n(P) := \min_{\hat{f}} r_n(P, \hat{f})$ .

**Profile maximum likelihood** An important class of properties is the collection of symmetric ones, which encompasses numerous well-known distribution characteristics, such as Shannon entropy, Rényi entropy, support size, and  $\ell_1$  distance to the uniform distribution. Symmetry connects the estimation of such property to the sample profile, a sufficient statistic for the task in hand. The general principle of maximum likelihood then provides an intuitive estimator, *profile maximum likelihood (PML)* [Orlitsky et al., 2004], that maximizes the probability of observing the profile.

Naturally and generally, we study symmetric property inference over a distribution collection  $P \subseteq \Delta$  that is also *symmetric*, i.e., if  $p \in P$ , then  $P$  as well contains all the symbol-permuted versions of  $p$ . For every sample  $x^n \in \mathcal{X}^n$  and symmetric  $P$ , the *PML estimator* over  $P$  maps  $x^n$  to a distribution

$$\mathcal{P}_\varphi(x^n) := \arg \max_{p \in P} \Pr_{X^n \sim p}(\varphi(X^n) = \varphi(x^n)).$$

Given a sample  $X^n \sim p \in P$  and a symmetric property  $p$ , the PML plug-in estimator uses  $f \circ \mathcal{P}(X^n)$  to estimate  $f(p)$ . The PML estimator often behaves differently from the classical empirical distribution estimator. For example, if  $P = \Delta$  and  $\varphi = \{2, 1, 1\}$ , the PML estimate turns out to be  $\mathcal{P}_\varphi = (\frac{1}{5}, \frac{1}{5}, \frac{1}{5}, \frac{1}{5}, \frac{1}{5})$ , deviating from the empirical distribution  $(\frac{1}{2}, \frac{1}{4}, \frac{1}{4})$  by 0.8 in  $L_1$  distance.

Recent researches [Acharya et al., 2017, Hao and Orlitsky, 2019a] show that for an extensive family of symmetric properties, including the previously mentioned four, the PML plug-in estimator *universally* achieves minimax error in the large-alphabet regime, up to constant factors.

The formulation of PML makes it part of two estimator classes, the maximum-likelihood and the *profile-based*, where the latter corresponds to estimators whose values depend on only the profile. The theorem below shows that profile-based estimators are sufficient for inferring symmetric properties.

**Theorem 3** (Sufficiency of profiles). *For any symmetric property  $f$  and set  $P \subseteq \Delta$ , and estimator  $\hat{f}$ , we can construct an explicit estimator  $\hat{F}$  over length- $n$  profiles satisfying*

$$r_n(p, \hat{f}) = r_n(P, \hat{F} \circ \varphi),$$

where both estimators can have independent randomness.

The next result shows that the PML estimator is adaptive to the simplicity of underlying distributions in inferring all symmetric properties, over any symmetric  $P$ . Specifically, the theorem states that the  $n$ -sample PML plug-in essentially performs as well as the optimal  $n/\mathcal{H}_n(p)$ -sample estimator, which approaches the performance of the optimal  $n$ -sample estimator if  $p$  has a small  $\mathcal{H}_n(p)$ . Furthermore, for any property and estimator, there is a symmetric set  $P'$  for which this  $1/\mathcal{H}_n(p)$  ratio is *optimal*.



**Theorem 4** (Competitiveness of PML). *For any symmetric property  $f$  and set  $P \subseteq \Delta$ , and every distribution  $p \in P$ , the PML plug-in estimator satisfies*

$$r_n(p, f \circ \mathcal{P}_\varphi) \leq 2r_{n_p}(P),$$

where  $n_p := n/\mathcal{H}_n(p)$ . *On the other hand, for any estimator  $\hat{f}$  and symmetric property  $f$ , there exists a symmetric set  $P' \subseteq \Delta$  such that for some  $p \in P'$ ,*

$$r_n(p, \hat{f}) \geq 2r_{n_p}(P').$$

We provide some brief comments here and more in Section 3. First, the above theorem holds for a polynomial-time PML approximation [Anari et al., 2020], and for any symmetric property, while nearly all previous works require the property to possess certain forms and be smooth. In particular, the algorithm in Anari et al. [2020] achieves the best-known guarantees for approximating PML, requires no additional assumptions on the distribution/property's structure, and works universally on all symmetric properties and adaptively on all profiles (hence distributions). Second, the result holds for any symmetric distribution set  $P \subseteq \Delta$ , which covers numerous domains of interest that appeared in the literature, such as the widely studied  $\Delta$ , and its subset  $\Delta_{1/|\mathcal{X}|}$  for the study of support size estimation, where each distribution's positive probabilities are at least  $1/|\mathcal{X}|$ . Third, the result trivially implies a weaker version in Acharya et al. [2017] where  $\mathcal{H}_n(p)$  is replaced by  $\sqrt{n}$ , which, as we show in Section 2.5, can be significantly larger.

## 2.4 Optimal Compression of Profiles

None of the scientific applications in Section 1 is possible without first storing the sample profile.

Hence, we focus on the task of lossless profile compression in this section. Besides the theoretical fundamentality and numerous applications, the task is essential as storing a sample's profile, compared with storing the entire sample sequence, often takes much less space. Specifically, Shannon entropy is the measure of limit of lossless compression, which, for sample  $X^n \sim p \in \Delta$ , is  $nH(p)$ , and for the sample's profile, is  $\mathcal{H}_n(p)$ . In particular, the sample entropy grows as  $\Omega(n)$  whenever  $p$  has an entropy of at least one, while the profile entropy is at most  $3\sqrt{n}$  by our argument in Section 2.2.

While the  $n$ -to- $\sqrt{n}$  improvement is already significant, the compression schemes we propose under the standard block and sequential settings surely take profile compression to the next level. Specifically, for every distribution  $p$  and sample size  $n$ , both schemes essentially compress the sample profile  $\varphi(X^n)$  to its entropy  $\mathcal{H}_n(p)$ , the information-theoretic limit, in expectation. In other words, our algorithms are *instance-by-instance optimal* and essentially *unimprovable*. Furthermore, we achieve this instance optimality with *near-optimal time complexity* – both algorithms have a running time near-linear in the sample size  $n$ .

**Block compression** We propose an intuitive and easy-to-implement block compression algorithm.

Recall that the profile of a sequence  $x^n$  is the multiset  $\varphi(x^n)$  of multiplicities associated with symbols in  $x^n$ . The ordering of elements in a multiset is not informative. Hence equivalently, we can compress  $\varphi(x^n)$  into the set  $\mathcal{C}(\varphi(x^n))$  of corresponding multiplicity-prevalence pairs, i.e.,

$$\mathcal{C}(\varphi(x^n)) := \{(\mu, \varphi_\mu(x^n)) : \mu \in \varphi(x^n)\}.$$

The number of pairs in  $\mathcal{C}(\varphi(x^n))$  is equal to the profile dimension  $\mathcal{D}(\varphi(x^n))$ . Besides, both prevalence and its multiplicity are integers in  $[0, n]$ , and storing the pair takes  $2 \log n$  nats. Hence, it takes at most  $2(\log n) \cdot \mathcal{D}(\varphi(x^n))$  nats to store the compressed profile. By Theorem 1, for any distribution  $p \in \Delta$  and sample  $X^n \sim p$ ,

$$\mathbb{E}[2(\log n) \cdot \mathcal{D}(X^n)] \simeq \mathcal{H}_n(p).$$

We have shown that storing a profile  $\varphi$  as  $\mathcal{C}(\varphi)$  is a near-optimal block compression scheme.

**Sequential compression** For any sequence  $x^n$ , the setting for sequential profile compression is that at time step  $t \in [n]$ , the compression algorithm knows only  $\varphi(x^t)$  and sequentially encodes the new information. This process is equivalent to providing the algorithm  $\mu_{x_t}(x^{t-1})$  at time step  $t$ .

Suppress  $x, x^t$  in the expressions for the ease of illustration. For efficient compression, we sequentially encode the profile  $\varphi$  into a *self-balancing binary search tree*  $\mathcal{T}$ , with each node storing a multiplicity-prevalence pair  $(\mu, \varphi_\mu)$  and  $\mu$  being the search key. We present the compression scheme as Algorithm 1, and establish the following guarantee.

---

**Algorithm 1** Sequential Profile Compression

---

**input** sequence  $(\mu_{x_t}(x^{t-1}))_{t=1}^n$ , tree  $\mathcal{T} = \emptyset$   
**output** tree  $\mathcal{T}$  that encodes the input sequence

```
for t = 1 to n do
  if  $\mu := \mu_{x_t}(x^{t-1}) \in \mathcal{T}$  then
    if  $\mu + 1 \in \mathcal{T}$  then
       $\varphi_{\mu+1} := \mathcal{T}(\mu + 1) \leftarrow \mathcal{T}(\mu + 1) + 1$ 
    else
      add  $(\mu + 1, 1)$  to  $\mathcal{T}$ 
    end if
  else
    if  $\varphi_\mu = 1$  then delete  $(\mu, \varphi_\mu)$  from  $\mathcal{T}$ 
    else  $\varphi_\mu := \mathcal{T}(\mu) \leftarrow \mathcal{T}(\mu) - 1$  endif
  end if
  if  $1 \notin \mathcal{T}$  then add  $(1, 1)$  to  $\mathcal{T}$ 
  else  $\mathcal{T}(1) \leftarrow \mathcal{T}(1) + 1$  endif
end if
end for
```

---

**Theorem 5.** *Algorithm 1 runs for exactly  $n$  iterations, with an  $\mathcal{O}(\log n)$  per-iteration time complexity. For an i.i.d. sample  $X^n \sim p$ , the expected space complexity is  $\tilde{\Theta}(\mathcal{H}_n(p))$ . On the other hand, any algorithm that compresses the profile losslessly has an expected space complexity of at least  $\mathcal{H}_n(p)$ .*

## 2.5 Optimal Characterization for Structured Families

In this section, we characterize the profile entropy of several important structured distribution families, including log-concave, power-law, histogram, and their mixtures. All the matching lower bounds are entirely new, and all the upper bounds, with the exception of that in Theorem 8, are much stronger than those induced by the prior work [Hao and Orlitsky, 2019b] via Theorem 1. For interested readers, see Appendix D for a detailed comparison.

**Log-concave** The log-concave family encompasses a broad range of discrete distributions, such as Poisson, hyper-Poisson, Poisson binomial, binomial, negative binomial, and geometric, and hyper-geometric, with broad applications to statistics [Saumard and Wellner, 2014], computer science [Lovász and Vempala, 2007], economics [An, 1997], and geometry [Stanley, 1989].

Formally, a distribution  $p \in \Delta_{\mathbb{Z}}$  is *log-concave* if  $p$  has a contiguous support and  $p_x^2 \geq p_{x-1} \cdot p_{x+1}$  for all  $x \in \mathbb{Z}$ . The next result bounds the profile entropy of this family, and is *tight* up to logarithmic factors. For simplicity, henceforth we write  $a \wedge b$  for  $\min\{a, b\}$  (and  $\vee$  for  $\max$ ), and slightly abuse the notation and write  $a \simeq b$  for  $a+1 = \tilde{\Theta}(b+1)$ , which does not change the nature of the results.

**Theorem 6.** *Let  $\mathcal{L}_\sigma \subseteq \Delta_{\mathbb{Z}}$  denote the collection of log-concave distributions with variance  $\sigma^2$ . Then,*

$$\max_{p \in \mathcal{L}_\sigma} \mathcal{H}_n(p) \simeq \sigma \wedge \frac{n}{\sigma}.$$

*In particular, if we discretize a Gaussian variable  $X \sim \mathcal{N}(\mu, \sigma^2)$  by rounding it to the nearest integer, the distribution of the resulting variable achieves the maximum, up to logarithmic factors. Moreover, such a discretization procedure preserves log-concavity for any continuous distribution over  $\mathbb{R}$ .*

**Power-law** Power-law is a ubiquitous structure appearing in many situations of scientific interest, ranging from natural phenomena such as the initial mass function of stars [Kroupa, 2001], species and genera [Humphries et al., 2010], rainfall [Machado and Rossow, 1993], population dynamics [Taylor, 1961], and brain surface electric potential [Miller et al., 2009], to human-made circumstances such as the word frequencies in a text [Baayen, 2002], income rankings [Drăgulescu and Yakovenko, 2001], company sizes [Axtell, 2001], and internet topology [Faloutsos et al., 1999].

Formally, a discrete distribution  $p \in \Delta_{\mathbb{Z}}$  is a *power-law with power  $\alpha \geq 0$*  if  $p$  has a support of  $[k] := \{1, \dots, k\}$  for some  $k \in \mathbb{Z}^+ \cup \{\infty\}$  and  $p_x \propto x^{-\alpha}$  for all  $x \in [k]$ . Note that if  $\alpha \in [0, 1]$ , the distribution is well-defined for only finite  $k$ . The next result fully characterizes the profile entropy of power-laws over all  $\alpha, n$ , and  $k$  ranges, and significantly improves that in Hao and Orlitsky [2019b].



**Theorem 7.** Let  $p \in \Delta_{[k]}$  be a power-law distribution with power  $\alpha$ . Then,

$$\mathcal{H}_n(p) \simeq \begin{cases} k & \text{if } \alpha > \frac{k^{1+\alpha}}{n} \vee 1 \text{ or } 1 \geq \alpha > \frac{k^2}{n}, \\ n^{\frac{1}{\alpha+1}} & \text{if } \frac{k^{1+\alpha}}{n} \geq \alpha > 1, \\ \left(\frac{n}{k^{1-\alpha}}\right)^{\frac{1}{1+\alpha}} & \text{if } \frac{k^2}{n} \wedge 1 \geq \alpha > \frac{k^{1-\alpha}}{n}, \\ \frac{n}{k^{1-\alpha}} - \frac{n}{k} & \text{if } \frac{k^{1-\alpha}}{n} \wedge 1 \geq \alpha \text{ and } \alpha \geq 2 \log_k \left(7\sqrt{\frac{k}{n}} + 1\right), \\ k \wedge \sqrt{\frac{n}{k^{1-\alpha}}} & \text{if } \frac{k^{1-\alpha}}{n} \wedge 1 \geq \alpha \text{ and } 2 \log_k \left(7\sqrt{\frac{k}{n}} + 1\right) > \alpha. \end{cases}$$

In particular, as  $\alpha \rightarrow 0$ , the bound degenerates to  $k \wedge \sqrt{\frac{n}{k}}$ , which is at most  $n^{\frac{1}{3}}$ .

Since a power-law sample profile is completely specified by  $\alpha$ ,  $k$ , and  $n$ , the above theorem directly applies to model parameter estimation. Specifically, we first compute  $\mathcal{D}_n \sim p$ , which is a simple function of the symbol counts. By Theorem 1, we can then use it to approximate  $\mathcal{H}_n(p)$ . Finally, we utilize the characterization theorem and find the parameter relations (testing might be necessary).

**Histogram** While histogram is among the most widely studied representations, histogram distributions' importance also rises with the rapid growth of data sizes in modern scientific applications. For example, *subsampling*, a generic strategy to handle large datasets, naturally induces a histogram distribution over different categories of the data. This induced distribution often summarizes vital data statistics, leveraging which yields efficient and flexible inference procedures.

Formally, a discrete distribution  $p \in \Delta_{\mathbb{Z}}$  is a *t-histogram* if we can partition its support into at most  $t$  pieces such that  $p$  takes the same probability value over each piece. The theorem below provides near-optimal bounds on the profile entropy of the *t-histogram* distributions.

**Theorem 8.** Denote by  $\mathcal{I}_t \subseteq \Delta_{\mathbb{Z}}$  the collection of *t-histogram* distributions. Then,

$$\max_{p \in \mathcal{I}_t} \mathcal{H}_n(p) \simeq (nt^2)^{\frac{1}{3}} \wedge \sqrt{n}.$$

In practical settings, the value of  $t$  is often poly-logarithmic in  $n$ , and the bound reduces to  $\tilde{O}(n^{1/3})$ . For the particular case of  $t = 1$ , distribution  $p$  is uniform over some unknown contiguous support. This result overlaps with Theorem 7 with  $\alpha = 0$ , yielding the following bound.

**Corollary 3.** For any uniform distribution  $p$  with support size  $k$ , we have  $\mathcal{H}_n(p) \simeq k \wedge \sqrt{\frac{n}{k}}$ .

### 3 Applications and Extensions

**Robust learning** The profile of any sequence is invariant to domain-symbol permutations. Since entropy is a symmetric property, the profile entropy of an i.i.d. sample is also permutation invariant. Consequently, a result in this paper that holds for a distribution will also hold for *any distributions possessing the same probability multiset*. For numerous practical applications, this *robustness to symbol permutation* is a desirable and novel notion of robustness that particularly resides in discrete domains, as samples often come as categorical data, while the alphabet ordering for the underlying distribution to exhibit certain structure is frequently unknown [Hao and Orłitsky, 2019b].

For example, the sample may consist of different fruits, not integers. But suppose there is a hidden mapping from the fruit domain to integers that makes the distribution log-concave over  $\mathbb{Z}$ . Then, all our results such as Theorem 2, 4, 5, and 6 are in effect. For another example, in natural language processing, we observe words and punctuation marks. Even we know that observations come from a power-law distribution [Mitzenmacher, 2004], it is often unclear how to order the alphabet to realize such a condition. The robustness of our approach again enables us to achieve a variety of learning objectives, such as understanding the relation between different model parameters (Theorem 7).

**Mixture models** The results in Section 2.5 provide optimal characterization for simple structured families. A standard extension to incorporate more complex structures in the model is spanning a distribution family by including (weighted) mixtures. A typical example is the Gaussian mixture model, which is among the most widely studied probabilistic models.

In the supplementary material, we present such results for all three families in Section 2.5, and for mixtures of discretized high-dimensional Gaussians. In fact, we obtain a simple and intuitive

profile-entropy characterization for all distributions. Partition the unit interval into a sequence of ranges,  $I_j := \left( (j-1)^2 \frac{\log n}{n}, j^2 \frac{\log n}{n} \right]$ ,  $1 \leq j \leq \sqrt{\frac{n}{\log n}}$ , and for any distribution  $p$ , denote by  $p_{I_j}$  the number of probabilities in  $I_j$ . Then,

**Lemma 1.** *For any  $n \in \mathbb{Z}^+$  and  $p \in \Delta$ , we have  $\mathcal{H}_n(p) \simeq \sum_{j \geq 1} \min \{p_{I_j}, j \cdot \log n\}$ .*

**Competitive property estimation** Theorem 2 on PML holds for every distribution, any symmetric property, and distribution collection, such as a finite-dimensional simplex, regardless of other parameters such as the alphabet size. To the best of our knowledge, this is one of the most general results in the field. Below we provide a basic example for its applications.

For an arbitrary  $\beta > 0$ , let  $f$  be the order- $\beta$  Rényi entropy, and  $\mathcal{P}$  be the set of distributions whose probability multisets correspond to power-laws with power  $\alpha \geq 3$ . The minimax error rate  $r_m(\mathcal{P})$  is unknown for this problem as recent works (e.g., [Acharya et al., 2016]) mainly focused on the standard simplexes. On the other hand, Theorem 4, together with Theorem 7, shows that the  $n$ -sample PML plug-in estimator essentially performs as well as the best  $n^{3/4}$ -sample estimator. Note that while the guarantee of PML uniformly holds for all  $\beta$ , the best estimator can optimize its performance for every  $\beta$ . Following the same rationale, we can derive such nontrivial competitive estimation results for numerous properties and distribution families without having to analyze them in detail.

**Adaptive testing and classification** Profile entropy also directly connects to adaptive testing and classification. Such a connection arises from computing the *profile probability* [Acharya et al., 2011, 2012], the probability of observing the sample’s profile under the same sampling process.

Specifically, the first paper designs an algorithm that distinguishes two unknown distributions using near-optimal sample sizes whenever the optimal algorithm has an exponentially small error probability. In addition, the algorithm is simply a ratio test between the probabilities of two profiles. Given sample  $X^n \sim p$  over a finite domain, we can compute its profile probability in  $\exp(\Theta(\mathcal{H}_n(p)))$  operations. For example, if the underlying distribution is a 4-histogram, then by Theorem 8, the running time exponent is of order  $n^{1/3}$ . The result follows by the equivalence of the problem and computing the permanent of a rank- $\mathcal{D}_n$  matrix [Barvinok, 1996, Vontobel, 2012, 2014, Barvinok, 2016].

**Method of types** We connect our approach to *the method of types*, an important technical tool in Shannon theory and many other fields [Csiszar and Körner, 2011, Wolfowitz, 2012]. In the notation of this paper, the *type* of a sequence  $x^n$  over some finite domain  $\mathcal{X}$  is the ordered list of multiplicities  $\mu_y(x^n)$ , which associates symbol  $y$  with its number of appearances in  $x^n$ . For this multiplicity list, the method of types associates each  $\mu_y(x^n)$  with the number of symbols having this multiplicity, which is precisely  $\varphi_{\mu_y(x^n)}(x^n)$ . Hence, the profile of a sequence is *the type of its type*.

Given the above arguments, understanding the deep connection between profile-based algorithms and the method of types is a meaningful future research direction to explore.

## 4 Conclusion and Broader Impact

Classical information theory states that an i.i.d. sample contains  $H(X^n \sim p) = nH(p)$  information, which provides little insight for statistical applications. We present a different view by decomposing the sample information into three parts: the labeling of the profile elements, ordering of them, and profile entropy. With no bias towards any symbols, the *profile entropy* rises as a fundamental measure unifying the concepts of estimation, inference, and compression. We believe this view could help researchers in information theory, statistical learning theory, and computer science communities better understand the information composition of i.i.d. samples over discrete domains.

The results established in this work are general and fundamental, and have numerous applications in privacy, economics, data storage, supervised learning, etc. A potential downside is that the theoretical guarantees of the associated algorithms rely on the assumption correctness, e.g., the domain should be discrete and the sampling process should be i.i.d. . In other words, it will be better if users can confirm these assumptions by prior knowledge, experiences, or statistical testing procedures. Taking a different perspective, we think a potential research direction following this work is to extend these results to Markovian models, making them more robust to model misspecification.

**Appendix organization** In the appendix, we order the results and proofs according to their logical priority. In other words, the proof of a theorem or lemma mainly relies on preceding results. For the ease of reference, the numbering of the theorems is consistent with that in the main paper.

## A Entropy and Dimension of Sample Profiles

Consider an arbitrary sequence  $x^n$  over a finite or countably infinite alphabet  $\mathcal{X}$ . The *multiplicity*  $\mu_y(x^n)$  of a symbol  $y \in \mathcal{X}$  is the number of times  $y$  appears in  $x^n$ . The *prevalence* of an integer  $\mu$  is the number  $\varphi_\mu(x^n)$  of symbols in  $x^n$  with multiplicity  $\mu$ . The *profile* of  $x^n$  is the multiset  $\varphi(x^n)$  of multiplicities of the symbols in  $x^n$ . We refer to it as a profile of *length*  $n$ .

The number  $\mathcal{D}(S)$  of distinct elements in a multiset  $S$  is its *dimension*. For convenience, we also write  $\mathcal{D}(x^n)$  for profile dimension. The dimension of a length- $n$  profile over  $\mathcal{X}$  is at most  $\min\{\sqrt{2n}, |\mathcal{X}|\}$ .

Let  $\Delta$  be the collection of all discrete distributions, and  $\Delta$  be the collection of those over  $\mathcal{X}$ . Draw a size- $n$  sample  $X^n$  from an arbitrary distribution in  $p \in \Delta$ . Then, the profile  $\Phi^n$  of  $X^n$  is a random multiset whose distribution depends on only  $p$  and  $n$ . We therefore write  $\Phi^n \sim p$ , and call  $\mathcal{H}_n(p) := H_n(p)$  the *profile entropy* with respect to  $(p, n)$ . Analogously, we call  $\mathcal{D}_n := \mathcal{D}_n$ , the *profile dimension* associated with  $(p, n)$ , and write  $\mathcal{D}_n \sim p$ .

Consider an arbitrary sequence  $x^n$  over a finite or countably infinite alphabet  $\mathcal{X}$ . The *multiplicity*  $\mu_y(x^n)$  of a symbol  $y \in \mathcal{X}$  is the frequency of  $y$  in  $x^n$ . The *prevalence* of an integer  $\mu$  is the number  $\varphi_\mu(x^n)$  of symbols in  $x^n$  with multiplicity  $\mu$ . The *profile* of  $x^n$  is the multiset  $\varphi(x^n)$  of multiplicities of the symbols in  $x^n$ , which we describe as a profile of *length*  $n$ .

### A.1 Concentration of Profile Dimension

First we express the dimension of a sample profile in terms of the symbol multiplicities. Denote by  $\bigvee$  the logical OR operator. For any distribution  $p$  and  $X^n \sim p$ ,

$$\mathcal{D}_n = \sum_{\mu=1}^n \bigvee_{x \in \mathcal{X}} \mathbb{1}_{\mu_x(X^n)=\mu}.$$

The statistical dependency landscape of terms in the summation is rather complex, since  $\mu_x(X^n)$  and  $\mu_y(X^n)$  are dependent for every  $(x, y)$  pair due to the fixed sample size; and so are  $\mathbb{1}_{\mu_x(X^n)=\mu_1}$  and  $\mathbb{1}_{\mu_x(X^n)=\mu_2}$  for every pair of distinct  $\mu_1$  and  $\mu_2$ . To simplify the derivations, we relate this quantity to its variant under the *Poisson sampling scheme*, i.e., making the sample size an independent  $N \sim \text{Poi}(n)$ . Specifically, define

$$\tilde{\mathcal{D}}_N := \tilde{\mathcal{D}}(X^N) := \sum_{U=1}^n \bigvee_{x \in \mathcal{X}} \mathbb{1}_{\mu_x(X^N)=U}.$$

Note that this is not the same as  $\mathcal{D}_N$  since the summation index goes up only to  $n$ .

Denote the expected value of  $\tilde{\mathcal{D}}_N$  by  $E_n(p)$ , which will frequently appear in the rest discussions. Our first result shows that the original  $\mathcal{D}_n$  satisfies a Chernoff-Hoeffding type bound centered at  $E_n(p)$ .

**Theorem 9.** *Under the above conditions and for any  $n \in \mathbb{Z}^+$ ,  $p \in \Delta$ , and  $\gamma > 0$ ,*

$$\Pr\left(\frac{\mathcal{D}_n}{1+\gamma} \geq E_n(p)\right) \leq 3\sqrt{n}e^{-\min\{\gamma^2, \gamma\}E_n(p)/3},$$

and for any  $\gamma \in (0, 1)$ ,

$$\Pr\left(\frac{\mathcal{D}_n}{1-\gamma} \leq E_n(p)\right) \leq 3\sqrt{n}e^{-\gamma^2 E_n(p)/2}.$$

*Proof.* A nice attribute of Poisson sampling is that all the multiplicities  $\mu_y(X^n)$  are independent of each other. We will first consider  $\mathcal{D}_N$  and relate it to the fixed-sample-size version later.

For simplicity and clarity, we suppress  $X^n$  in  $\mu_y(X^n)$  and write  $\nu_y$  instead of  $\mu_y$  when the multiplicity is obtained through Poisson sampling. For any  $i \in [n]$ , denote  $G_i(\{\nu_x\}_x) := \bigvee_{x \in \mathcal{X}} \mathbb{1}_{\nu_x=i}$ . As

mentioned previously, instead of analyzing  $\mathcal{D}_N$ , we consider

$$\tilde{\mathcal{D}}_N = \sum_{i=1}^n \bigvee_{x \in \mathcal{X}} \mathbb{1}_{\nu_x=i} = \sum_{i=1}^n G_i(\{\nu_x\}_x).$$

Note that for any disjoint  $I, J \subseteq [n]$ , the functions  $\sum_{i \in I} G_i(\{\nu_x\}_x)$  and  $\sum_{j \in J} G_j(\{\nu_x\}_x)$  are discordant monotone by each argument, namely, when we increase the value of each  $\nu_x$ , the increase in the value of one function implies the non-increase of the other. Then, by the results in [Lehmann \[1966\]](#), the values of the two functions, when viewed as random variables, are negatively associated.

Next we show that quantity  $\tilde{\mathcal{D}}_N$  satisfies a Chernoff-type bound.

Let  $\gamma$  be an arbitrary positive number. Note that  $G_i$  is a Bernoulli random variable with parameter

$$q_i := \mathbb{E}[G_i(\{\nu_x\}_x)].$$

Then for the expected value of  $\tilde{\mathcal{D}}_N$ , we have

$$E_n(p) := \mathbb{E}[\tilde{\mathcal{D}}_N] = \mathbb{E}\left[\sum_{i=1}^n G_i(\{\nu_x\}_x)\right] = \sum_i q_i.$$

For simplicity, temporarily write  $Y := \tilde{\mathcal{D}}_N$  and  $\mu := E_n(p)$ . Then, by Markov's inequality and the monotonicity of function  $e^{ty}$  over  $t > 0$ ,

$$\Pr(Y \geq (1 + \gamma)\mu) = \Pr(e^{tY} \geq e^{t(1+\gamma)\mu}) \leq \frac{\mathbb{E}[e^{tY}]}{e^{t(1+\gamma)\mu}}.$$

It suffices to bound  $\mathbb{E}[e^{tY}]$  by a function of other parameters.

$$\begin{aligned} \mathbb{E}[e^{tY}] &\stackrel{(a)}{=} \mathbb{E}\left[\exp\left(t\left(\sum_{i=1}^n G_i(\{M_x\}_x)\right)\right)\right] \\ &\stackrel{(b)}{=} \mathbb{E}\left[\exp(tG_1(\{M_x\}_x)) \cdot \exp\left(t\left(\sum_{i=2}^n G_i(\{M_x\}_x)\right)\right)\right] \\ &\stackrel{(c)}{\leq} \mathbb{E}[\exp(tG_1(\{M_x\}_x))] \cdot \mathbb{E}\left[\exp\left(t\left(\sum_{i=2}^n G_i(\{M_x\}_x)\right)\right)\right] \\ &\stackrel{(d)}{\leq} \prod_{i=1}^n \mathbb{E}[\exp(tG_i(\{M_x\}_x))] \stackrel{(e)}{=} \prod_{i=1}^n (1 + q_i(e^t - 1)) \\ &\stackrel{(f)}{\leq} \prod_{i=1}^n (\exp(q_i(e^t - 1))) \stackrel{(g)}{=} \exp\left(\sum_{i=1}^n q_i(e^t - 1)\right) \\ &\stackrel{(h)}{=} \exp((e^t - 1)\mu), \end{aligned}$$

where (a) follows by the definition of  $Y$ ; (b) follows by  $e^{a+b} = e^a \cdot e^b$ ; (c) follows by the fact that  $G_1$  is negatively associated with  $\sum_{i=2}^n G_i$ ; (d) follows by an induction argument via negative association; (e) follows by the fact that  $G_i$  is a Bernoulli random variable with mean  $q_i$ ; (f) follows by the inequality  $1 + x \leq e^x, \forall x \geq 0$ ; (g) follows by  $e^a \cdot e^b = e^{a+b}$ ; and (h) follows by  $\mu = \sum_i q_i$ .

Applying standard simplifications, we obtain

$$\Pr(Y \geq (1 + \gamma)\mu) \leq e^{-\min\{\gamma^2, \gamma\}\mu/3}, \forall \gamma > 0,$$

and

$$\Pr(Y \leq (1 - \gamma)\mu) \leq e^{-\gamma^2\mu/2}, \forall \gamma \in (0, 1).$$

The proof will be complete upon noting that: 1) the probability that  $N = n$  is at least  $1/(3\sqrt{n})$ ; 2) conditioning on  $N = n$  transforms the sampling model to that with a fixed sample size  $n$ .  $\square$

As a corollary, the value of  $\mathcal{D}_n$  is often close to  $E_n(p)$ .

**Corollary 4.** *Under the same conditions as above and for any  $n \in \mathbb{Z}^+$ ,  $p \in \Delta$ , with probability at least  $1 - 6/\sqrt{n}$ ,*

$$\frac{1}{2}E_n(p) - 4 \log n \leq \mathcal{D}_n \leq 2E_n(p) + 3 \log n.$$

*Proof.* To establish the lower bound, note that if  $E_n(p) \geq 3 \log n$ , setting  $\gamma = 1$  in Theorem 9 yields

$$\Pr(\mathcal{D}_n \geq 2E_n(p) + 3 \log n) \leq \Pr(\mathcal{D}_n \geq 2E_n(p)) \leq 3\sqrt{n}e^{-E_n(p)/3} \leq \frac{3}{\sqrt{n}},$$

else if  $E_n(p) < 3 \log n$ , setting  $\gamma = (3 \log n)/E_n(p)$  yields

$$\Pr(\mathcal{D}_n \geq 2E_n(p) + 3 \log n) \leq \Pr(\mathcal{D}_n \geq E_n(p) + 3 \log n) \leq 3\sqrt{n}e^{-(3 \log n)/3} = \frac{3}{\sqrt{n}}.$$

As for the upper bound, if  $E_n(p) \geq 8 \log n$ ,

$$\Pr\left(\mathcal{D}_n + 4 \log n \leq \left(1 - \frac{1}{2}\right)E_n(p)\right) \leq \Pr\left(\mathcal{D}_n \leq \left(1 - \frac{1}{2}\right)E_n(p)\right) \leq 3\sqrt{n}e^{-\mu/8} \leq \frac{3}{\sqrt{n}},$$

and for any  $E_n(p) < 8 \log n$ ,

$$\Pr\left(\mathcal{D}_n + 4 \log n \leq \left(1 - \frac{1}{2}\right)E_n(p)\right) \leq \Pr(\mathcal{D}_n < 0) = 0 \leq \frac{3}{\sqrt{n}}.$$

Combining these tail bounds through the union bound completes the proof.  $\square$

In addition to the above, we establish an Efron-Stein type inequality.

**Theorem 10.** *For any distribution  $p$  and  $\mathcal{D}_n \sim p$ ,*

$$\text{Var}(\mathcal{D}_n) \leq \mathbb{E}[\mathcal{D}_n].$$

*Proof.* First, note that for any  $j, t \in [n]$  and  $j \neq t$ ,

$$\begin{aligned} C_{j,t} &:= \text{Cov}\left(\mathbb{1}_{\varphi_j(X^n) > 0}, \mathbb{1}_{\varphi_t(X^n) > 0}\right) \\ &= \Pr(\varphi_j(X^n), \varphi_t(X^n) > 0) - \Pr(\varphi_j(X^n) > 0) \cdot \Pr(\varphi_t(X^n) > 0) \\ &= (\Pr(\varphi_j(X^n) > 0 | \varphi_t(X^n) > 0) - \Pr(\varphi_j(X^n) > 0)) \cdot \Pr(\varphi_t(X^n) > 0) \\ &= (\Pr(\varphi_j(X^n) > 0 | \varphi_t(X^n) > 0) - \Pr(\varphi_j(X^n) > 0 | \varphi_t(X^n) = 0)) \\ &\quad \times \Pr(\varphi_t(X^n) = 0) \cdot \Pr(\varphi_t(X^n) > 0) \\ &\leq 0 \end{aligned}$$

Therefore, the variance of the profile dimension  $\mathcal{D}_n$  satisfies

$$\begin{aligned} \text{Var}(\mathcal{D}_n) &= \text{Var}\left(\sum_{i=1}^n \mathbb{1}_{\varphi_i(X^n) > 0}\right) \\ &\leq \sum_{i=1}^n \text{Var}\left(\mathbb{1}_{\varphi_i(X^n) > 0}\right) + \sum_{j \neq t} \text{Cov}\left(\mathbb{1}_{\varphi_j(X^n) > 0}, \mathbb{1}_{\varphi_t(X^n) > 0}\right) \\ &\leq \sum_{i=1}^n \mathbb{E}\left[\mathbb{1}_{\varphi_i(X^n) > 0}\right] + \sum_{j \neq t} C_{j,t} \\ &\leq \sum_{i=1}^n \mathbb{E}\left[\mathbb{1}_{\varphi_i(X^n) > 0}\right] \\ &= \mathbb{E}[\mathcal{D}_n]. \end{aligned} \quad \square$$

## A.2 Theorem 1: Dimension-Entropy Equivalence

The following theorem shows that for every distribution and sampling parameter  $n$ , the induced profile entropy and dimension are of the same order, with high probability.

**Theorem 1** (Entropy-dimension equivalence). *For any distribution  $p \in \Delta$  and  $\mathcal{D}_n \sim p$ ,*

$$\Pr(\mathcal{D}_n \simeq \mathcal{H}_n(p)) \geq 1 - \frac{1}{\sqrt{n}}.$$

## A.3 Proof of Theorem 1

**Proof outline** We decompose the proof of the theorem into three steps.

First, we show  $\mathcal{H}_n(p) \lesssim \mathcal{D}_n$  with high probability, which is a consequence of Theorem 9 (which shows that  $\mathcal{D}_n$  highly concentrates around its expectation) and Shannon's source coding theorem. Second, we introduce a simple quantity  $\mathcal{H}_n^S(p)$  that approximates the expectation of  $\mathcal{D}_n$  to within logarithmic factors of  $n$ . Finally, leveraging this approximation guarantee, we establish the other direction of the theorem. This step is more involved due to the aforementioned complications.

### Step 1: Bounding Profile Entropy by Its Dimension

By the tail bounds (Theorem 9) and trivial lower bound of 1 on the profile dimension, with probability at least  $1 - 1/\sqrt{n}$ , the expectation of  $\mathcal{D}_n$  satisfies

$$\mathbb{E}[\mathcal{D}_n] \lesssim \mathcal{D}_n.$$

By our result on block profile compression (Section 2.4), storing profile  $\Phi^n \sim p$  losslessly takes

$$\mathcal{O}(\log n) \cdot \mathbb{E}[\mathcal{D}_n] + \mathcal{O}\left(\frac{1}{\sqrt{n}}\right) \cdot \log \mathbb{P}(n) \lesssim \mathbb{E}[\mathcal{D}_n]$$

nats space in expectation. By Shannon's source coding theorem, the expected space to losslessly storing a random variable is at least its entropy. Hence, with probability at least  $1 - \mathcal{O}(1/\sqrt{n})$ ,

$$\mathcal{H}_n(p) \lesssim \mathbb{E}[\mathcal{D}_n] \lesssim \mathcal{D}_n.$$

Applying  $\mathcal{D}_n \geq 1$  completes the proof.

### Step 2: Simple Approximation Formula for Profile Dimension

Next, we show that  $\mathcal{H}_n(p) \gtrsim \mathcal{D}_n$ , with high probability. Note that  $\mathcal{D}_n \sim p$  is often close to  $E_n(p)$ , the expectation of its Poissonized version  $\tilde{\mathcal{D}}_N$ , with an exponentially small deviation probability. Hence, to approximate  $\mathcal{D}_n$ , it suffices to accurately compute  $E_n(p)$ .

By independence and the linearity of expectations,

$$E_n(p) = \mathbb{E}[\tilde{\mathcal{D}}_N] = \sum_{i=1}^n \left( 1 - \prod_{x \in \mathcal{X}} \left( 1 - e^{-np_x} \frac{(np_x)^i}{i!} \right) \right).$$

The expression is exact but does not relate to  $p$  in a simple manner. For an intuitive approximation, we partition the unit interval into a sequence of ranges,

$$I_j := \left( (j-1)^2 \frac{\log n}{n}, j^2 \frac{\log n}{n} \right], 1 \leq j \leq \sqrt{\frac{n}{\log n}},$$

denote by  $p_{I_j}$  the number of probabilities  $p_x$  belonging to  $I_j$ , and relate  $E_n(p)$  to an induced shape-reflecting quantity,

$$\mathcal{H}_n^S(p) := \sum_{j \geq 1} \min \{ p_{I_j}, j \cdot \log n \},$$

the sum of the effective number of probabilities lying within each range [Hao and Orlitsky, 2019b]. To compute  $\mathcal{H}_n^S(p)$ , we simply count the number of probabilities in each  $I_j$ . Our main result shows that  $\mathcal{H}_n^S(p)$  well approximates  $E_n(p)$  over the entire  $\Delta$ , up to logarithmic factors of  $n$ .



**Theorem 11.** For any  $n \in \mathbb{Z}^+$  and  $p \in \Delta$ ,

$$\frac{1}{\sqrt{\log n}} \cdot \Omega(\mathcal{H}_n^S(p)) \leq E_n(p) \leq \mathcal{O}(\mathcal{H}_n^S(p)).$$

*Proof.* The fact that  $\mathcal{O}(\mathcal{H}_n^S(p))$  upper bounds  $\mathbb{E}[\tilde{\mathcal{D}}_N]$  simply follows by the concentration of Poisson variables, and is established in [Hao and Orlicsky \[2019b\]](#). Below we show that the quantity also serves as a lower bound. By construction, for any given sampling parameter  $n$ , index  $j$ , and symbol  $x$  with probability  $p_x \in I_j$ , the corresponding symbol multiplicity  $\mu_x \sim \text{Poi}(np_x)$ . Hence, we can express the expectation of  $\tilde{\mathcal{D}}_N$  as

$$\begin{aligned} \mathbb{E}[\tilde{\mathcal{D}}_N] &= \mathbb{E}\left[\sum_{i=1}^n \bigvee_x \mathbb{1}_{\mu_x=i}\right] \\ &= \sum_{i=1}^n \mathbb{E}\left[1 - \bigwedge_x \mathbb{1}_{\mu_x \neq i}\right] \\ &= \sum_{i=1}^n \left(1 - \mathbb{E}\left[\prod_x \mathbb{1}_{\mu_x \neq i}\right]\right) \\ &= \sum_{i=1}^n \left(1 - \prod_x \mathbb{E}[\mathbb{1}_{\mu_x \neq i}]\right) \\ &= \sum_{i=1}^n \left(1 - \prod_x \left(1 - e^{-np_x} \frac{(np_x)^i}{i!}\right)\right). \end{aligned}$$

This proves the aforementioned formula. Then, for every sufficiently large index  $j$  and  $i \in S_j := [(j-1)^2, j^2] \log n$ , define a sequence of intervals,

$$I_j^i := \frac{i}{n} + [-j, j] \frac{\sqrt{\log n}}{n}.$$

Then for any  $i \in S_j$  and  $p_x \in I_j^i \cap I_j$ , the corresponding Poisson probability satisfies

$$\begin{aligned} e^{-np_x} \frac{(np_x)^i}{i!} &= e^{-i} \frac{i^i}{i!} \cdot \left(e^{i-np_x} \cdot \frac{(np_x)^i}{i^i}\right) \\ &= e^{-i} \frac{i^i}{i!} \cdot \left(e^{-(np_x-i)} \cdot \left(1 + \frac{np_x-i}{i}\right)^i\right) \\ &= e^{-i} \frac{i^i}{i!} \cdot \exp\left(-i(np_x-i) + i \cdot \log\left(1 + \frac{np_x-i}{i}\right)\right) \\ &\geq \frac{1}{3\sqrt{i}} \cdot \exp\left(-\frac{2i}{3} \cdot \left(\frac{np_x-i}{i}\right)^2\right) \\ &\geq \frac{1}{9\sqrt{i}} \geq \frac{1}{9j\sqrt{\log n}}. \end{aligned}$$

Now we analyze the contribution of indices  $i \in S_j$  to the expected value of  $\tilde{\mathcal{D}}_N$ . For clarity, we divide our analysis into two cases:  $p_{I_j} \geq j \log n$  and  $p_{I_j} < j \log n$ .

Consider the collection  $\mathcal{P}_j$  of probabilities  $p_x \in I_j$ , and the collection  $\mathcal{I}_j$  of intervals  $I_j^i, i \in S_j$ . By construction, each probability in  $\mathcal{P}_j$  is contained in at least  $j\sqrt{\log n}$  many intervals in  $\mathcal{I}_j$ . Hence the total number of probabilities (repeatedly counted) included in  $\mathcal{I}_j$  is at least  $p_{I_j} \cdot j\sqrt{\log n}$ . Note that the number of intervals in  $\mathcal{I}_j$  is less than  $2j \log n$ . We claim that there exists one (or more) interval  $I_j^{i'}$  in  $\mathcal{I}_j$  containing at least  $p_{I_j}/(2\sqrt{\log n})$  probabilities. By construction, there are at least  $j\sqrt{\log n}/2$  neighboring intervals of  $I_j^{i'}$  that contain at least  $p_{I_j}/(4\sqrt{\log n})$  probabilities. The

contribution of these these intervals to the expected value of  $\tilde{\mathcal{D}}_N$  is at least  $j\sqrt{\log n}/2$  times

$$\begin{aligned} 1 - \left(1 - \frac{1}{9j\sqrt{\log n}}\right)^{\frac{p_{I_j}}{4\sqrt{\log n}}} &\geq 1 - \exp\left(\frac{p_{I_j}}{4\sqrt{\log n}} \log\left(1 - \frac{1}{9j\sqrt{\log n}}\right)\right) \\ &\geq 1 - \exp\left(-\frac{p_{I_j}}{40j \log n}\right) \\ &\geq \Theta\left(\frac{p_{I_j}}{j \log n}\right), \end{aligned}$$

where the last step holds if  $p_{I_j} \leq j \log n$ . This yields a lower bound of  $\Theta(p_{I_j}/\sqrt{\log n})$ .

It remains to consider the  $p_{I_j} > j \log n$  case. Again, the total number of probabilities included in  $\mathcal{I}_j$  is at least  $p_{I_j} \cdot j\sqrt{\log n}$ . Furthermore, each interval  $I_j^i$  contains at most  $p_{I_j}$  probabilities and there are less than  $2j \log n$  intervals. Therefore, the number of intervals that contain at least  $j\sqrt{\log n}/4$  probabilities is at least  $j\sqrt{\log n}/2$ . Otherwise, the number of probabilities included in  $\mathcal{I}_j$  is less than

$$\frac{j\sqrt{\log n}}{4} \cdot 2j \log n + p_{I_j} \cdot \frac{j\sqrt{\log n}}{2} \leq p_{I_j} \cdot j\sqrt{\log n},$$

which leads to a contradiction. Analogously, the contribution of these these intervals to the expected value of  $\tilde{\mathcal{D}}_N$  is at least  $j\sqrt{\log n}/2$  times

$$\begin{aligned} 1 - \left(1 - \frac{1}{9j\sqrt{\log n}}\right)^{\frac{j\sqrt{\log n}}{4}} &\geq 1 - \exp\left(\frac{j\sqrt{\log n}}{4} \log\left(1 - \frac{1}{9j\sqrt{\log n}}\right)\right) \\ &\geq 1 - \exp\left(-\frac{1}{40}\right) \\ &= \Theta(1), \end{aligned}$$

which yields a lower bound of  $\Theta(j\sqrt{\log n})$  on the expected value of  $\tilde{\mathcal{D}}_N$ .

Consolidating the previous results shows that

$$\mathbb{E}[\tilde{\mathcal{D}}_N] \geq \frac{1}{\sqrt{\log n}} \cdot \Omega\left(\sum_{j \geq 1} \min\{p_{I_j}, j \cdot \log n\}\right). \quad \square$$

### Step 3: Bounding Profile Dimension by Its Entropy

Next, we establish that for any distribution  $p \in \Delta$ ,  $\Phi^n \sim p$ , with probability at least  $1 - 1/\sqrt{n}$ ,

$$\mathcal{H}_n(p) \gtrsim \mathcal{D}_n.$$

Let  $p$  be an arbitrary distribution in  $\Delta$ . Recall that we partition the interval  $(0, 1]$  into a sequence of sub-intervals,

$$I_j := \left((j-1)^2 \frac{\log n}{n}, j^2 \frac{\log n}{n}\right], \quad 1 \leq j \leq \sqrt{\frac{n}{\log n}},$$

and denote by  $p_{I_j}$  the number of probabilities  $p_x$  in  $I_j$ .

Our current objective is to bound  $H(\Phi^n \sim p)$  from below by a nontrivial multiple of  $H_n^S(p)$ . For simplicity of derivations, we will adopt the standard Poisson sampling scheme and make the sample size an independent Poisson variable  $N \sim \text{Poi}(n)$ . For notational simplicity, we will suppress  $X^N$  in all the expressions and write the profile as  $\varphi := \Phi^N$  by slightly abusing the notation.

Note that the profile can be equivalently expressed as a length- $n$  vector

$$\varphi = (\varphi_1, \dots, \varphi_n),$$

where  $\varphi_i$  denotes the number of symbols appearing exactly  $i$  times.

For a sufficiently large absolute constant  $c$ , decompose  $\varphi$  into  $c$  parts according to  $I_j$  such that the  $t$ -th part ( $t = 1, \dots, c$ ) consists of  $\varphi_i$ 's satisfying  $i \in nI_j$  with  $j \equiv t \pmod{c}$ . Since by definition,

$$H_n^S(p) = \sum_{j \geq 1} \min\{p_{I_j}, j \cdot \log n\},$$

one of the  $c$  parts corresponds to a partial sum of at least  $H_n^S(p)/c$ . Without loss of generality, we assume that it is the second part, i.e.,

$$\sum_{j \equiv 1 \pmod{c}} \min\{p_{I_j}, j \cdot \log n\} \geq \frac{H_n^S(p)}{c}.$$

Apply standard Poisson tail probability bounds. For example,

**Lemma 2.** *Let  $Y$  be a Poisson or binomial random variable with mean value  $\lambda$ . Then,*

$$\Pr(X \leq \lambda(1 - \delta)) \leq \exp\left(-\frac{\delta^2 \lambda}{2}\right), \quad \forall \delta \in [0, 1],$$

and

$$\Pr(X \geq \lambda(1 + \delta)) \leq \exp\left(-\frac{\delta^2 \lambda}{2 + 2\delta/3}\right), \quad \forall \delta \geq 0.$$

For any  $j \equiv 1 \pmod{c}$  and with probability at least  $1 - 1/n^4$ , one can express the truncated profile  $(\varphi_i)_{i \in nI_j}$  over  $I_j$  as a function of  $\mu_x$  for  $x$  satisfying  $np_x \in I_{j'}$ ,  $j' \in (j - c/2, j + c/2)$ .

Basically, this says that for every  $x$ , the number of its appearance is not too far away from the expected value. By the union bound, this is true for all  $j \equiv 1 \pmod{c}$  with probability at least  $1 - 1/n^3$ , as  $j$  can take only  $n$  possible values. Denote the last event by  $A$ .

To proceed, we recall the formula of [Hardy and Ramanujan \[1918\]](#) on the number  $\mathbb{P}(n)$  of integer partitions of  $n$ , which happens to equal to the number of length- $n$  profiles:

$$\log \mathbb{P}(n) = 2\pi \sqrt{\frac{n}{6}}(1 + o(1)).$$

Below, we will use a weaker version that works for any  $n$ :

$$\log \mathbb{P}(n) \leq \sqrt{3n}.$$

Then, conditioning on  $A$ , the truncated profiles  $(\varphi_i)_{i \in nI_j}$  for  $j \equiv 1 \pmod{c}$  are independent. Since conditioning reduces entropy,

$$\begin{aligned} H(\varphi) &\geq H((\varphi_i)_{i \in nI_j, j \equiv 1 \pmod{c}}) \\ &\geq H((\varphi_i)_{i \in nI_j, j \equiv 1 \pmod{c}} | \mathbf{1}_A) \\ &\geq H((\varphi_i)_{i \in nI_j, j \equiv 1 \pmod{c}} | \mathbf{1}_A = 1) \cdot \Pr(A) \\ &= \sum_{j \equiv 1 \pmod{c}} H((\varphi_i)_{i \in nI_j} | \mathbf{1}_A = 1) \cdot \Pr(A) \\ &= \sum_{j \equiv 1 \pmod{c}} H((\varphi_i)_{i \in nI_j} | \mathbf{1}_A) - \sum_{j \equiv 1 \pmod{c}} H((\varphi_i)_{i \in nI_j} | \mathbf{1}_A = 0) \cdot (1 - \Pr(A)) \\ &\geq \sum_{j \equiv 1 \pmod{c}} (H((\varphi_i)_{i \in nI_j}) - H(\mathbf{1}_A)) - \frac{1}{n^3} \sum_{j \equiv 1 \pmod{c}} H((\varphi_i)_{i \in nI_j} | \mathbf{1}_A = 0) \\ &\geq -nH(\mathbf{1}_A) + \sum_{j \equiv 1 \pmod{c}} H((\varphi_i)_{i \in nI_j}) - \frac{1}{n^3} \cdot n \cdot \log(\exp(\Theta(\sqrt{n}))) \\ &= -\mathcal{O}\left(\frac{1}{\sqrt{n}}\right) + \sum_{j \equiv 1 \pmod{c}} H((\varphi_i)_{i \in nI_j}), \end{aligned}$$

where the third last step follows by

$$H(X|Y) = H(X) - I(X, Y) = H(X) - H(Y) + H(Y|X) \geq H(X) - H(Y);$$

the second last follows by  $H(X) \leq \log k$  for any  $X$  with a support size of  $k$ , and the fact that there are at most  $\exp(3\sqrt{m})$  many profiles of length  $m$ , as we explained above; and the last step follows by the elementary inequality

$$H(\text{Bern}(\theta)) \leq 2(\log 2)\sqrt{\theta(1 - \theta)}, \quad \forall \theta \in [0, 1].$$

Our new objective is to bound  $H((\varphi_i)_{i \in nI_j})$  from below. We will find a sub-interval  $I_j^s$  of  $I_j$  and bound  $H((\varphi_i)_{i \in nI_j^s})$  in the rest of the section, since

$$H((\varphi_i)_{i \in nI_j}) \geq H((\varphi_i)_{i \in nI_j^s}).$$

For all  $j \equiv 1 \pmod c$ , our lower bound is simply

$$H((\varphi_i)_{i \in nI_j^s}) \geq \Omega \left( \frac{1}{\sqrt{\log n}} \min \{p_{I_j}, j \cdot \log n\} \right),$$

which, together with  $\sum_{j \equiv 1 \pmod c} \min \{p_{I_j}, j \cdot \log n\} \geq H_n^S(p)/c$ , implies that

$$H(\varphi) \geq -\mathcal{O} \left( \frac{1}{\sqrt{n}} \right) + \sum_{j \equiv 1 \pmod c} H((\varphi_i)_{i \in nI_j}) \geq \Omega \left( \frac{1}{\sqrt{\log n}} \right) \cdot T_n.$$

Henceforth, we assume that  $j$  is sufficiently large and denote  $L_j := j\sqrt{\log n}$ .

For any  $j$  and every integer  $i \in S_j := [(j-1)^2, j^2] \log n$ , define a sequence of intervals,

$$I_j^i := \frac{i}{n} + \frac{L_j}{n} [-1, 1].$$

Then for any  $i \in S_j$  and  $p_x \in I_j^i \cap I_j$ , the corresponding Poisson probability satisfies

$$\begin{aligned} e^{-np_x} \frac{(np_x)^i}{i!} &= e^{-i} \frac{i^i}{i!} \cdot \exp \left( -(np_x - i) + i \cdot \log \left( 1 + \frac{np_x - i}{i} \right) \right) \\ &\geq \frac{1}{3\sqrt{i}} \cdot \exp \left( -\frac{2i}{3} \cdot \left( \frac{np_x - i}{i} \right)^2 \right) \\ &\geq \frac{1}{9\sqrt{i}} \geq \frac{1}{9L_j}. \end{aligned}$$

On the other hand, the following upper bound holds.

$$\begin{aligned} e^{-np_x} \frac{(np_x)^i}{i!} &= e^{-i} \frac{i^i}{i!} \cdot \exp \left( -(np_x - i) + i \cdot \log \left( 1 + \frac{np_x - i}{i} \right) \right) \\ &\leq e^{-i} \frac{i^i}{i!} \leq \frac{1}{\sqrt{2\pi i}} \leq \frac{1}{2L_j}. \end{aligned}$$

In other words, for any  $p_x, i/n \in I_j$  that differ by at most  $L_j/n$ ,

$$\Pr(\text{Poi}(np_x) = i) \in \frac{1}{L_j} \left[ \frac{1}{9}, \frac{1}{2} \right].$$

Partition  $I_j$  into sub-intervals of equal length  $L_j/n$ . The partition has a size of at most  $2\sqrt{\log n}$ . Assign each probability  $p_x \in I_j$  a length- $L_j/n$  interval  $I_{p_x}$  centered at  $p_x$ . Then, each interval  $I_{p_x}$  covers at least one of the sub-intervals in the partition. Since there are exactly  $p_{I_j}$  intervals  $I_{p_x}$ , one can find a partition sub-interval  $I_j^s$  contained in at least  $p_{I_j}/(2\sqrt{\log n})$  of them. Denote by  $\mathcal{X}_s$  the collection of symbols corresponding to these intervals.

Next, we bound from below the entropy of the truncated profile  $(\varphi_i)_{i \in nI_j^s}$  over  $nI_j^s$ . Denote by  $j_s$  the left end point of  $nI_j^s$ . By the chain rule of entropy for multiple random variables,

$$H((\varphi_i)_{i \in nI_j^s}) = \sum_{i=j_s}^{j_s+L_j-1} H(\varphi_i | \varphi_{j_s}, \dots, \varphi_{i-1}).$$

Consider a particular term on the right-hand side with  $i \in [j_s, j_s + L_j - 1]$ . By the conditional independence and fact that conditioning reduces entropy,

$$\begin{aligned} H(\varphi_i | \varphi_{j_s}, \dots, \varphi_{i-1}) &\geq H(\varphi_i | \varphi_{j_s}, \dots, \varphi_{i-1}; \mathbf{1}_{j_s \leq \mu_x \leq i-1}, x \in \mathcal{X}) \\ &= H(\varphi_i | \mathbf{1}_{j_s \leq \mu_x \leq i-1}, x \in \mathcal{X}) \\ &= H(\varphi_i | \mathbf{1}_{j_s \leq \mu_x \leq i-1}, x \in \mathcal{X}_s; \mathbf{1}_{j_s \leq \mu_x \leq i-1}, x \notin \mathcal{X}_s) \end{aligned}$$

To characterize the condition, we define a random variable

$$K_i^s := \sum_{x \in \mathcal{X}_s} \mathbb{1}_{j_s \leq \mu_x \leq i-1}.$$

Note that  $\mathbb{E}[\mathbb{1}_{j_s \leq \mu_x \leq i-1}] = \sum_{t=j_s}^{i-1} \Pr(\text{Poi}(np_x) = t) \leq (i - j_s)/(2L_j)$ , which is at most  $1/10$  for  $i \leq j_s + L_j/5$ . The following lemma transforms this into a high-probability statement.

**Lemma 3.** *Let  $Y_i, i \in [1, m]$  be independent indicator random variables. Let  $Y := \sum_i Y_i$  denote their sum and  $\lambda := \mathbb{E}[Y]$  denote the expected sum. Then for  $c > 0$ , we have*

$$\Pr(Y \geq \lambda(1 + c)) \leq \exp(-\lambda c^2 / (2 + 2c/3)).$$

Below we consider only  $i \leq j_s + L_j/5$ . Note that  $c/(2 + 2c/3)$  is increasing for  $c > 0$ .

Since  $\mathbb{E}[K_i^s] = \sum_{x \in \mathcal{X}_s} \mathbb{E}[\mathbb{1}_{j_s \leq \mu_x \leq i-1}] \leq |\mathcal{X}_s|/10$ ,

$$\Pr(K_i^s \geq |\mathcal{X}_s|/2) \leq \exp(-36/35) < 1/2.$$

where we set  $c = 4$  in the above lemma and assume that  $|\mathcal{X}_s| \geq 3$  (assuming only  $|\mathcal{X}_s| \geq 1$ , the upper bound becomes  $3/4$ ). Recall that

$$\begin{aligned} H(\varphi_i | \varphi_{j_s}, \dots, \varphi_{i-1}) &\geq H(\varphi_i | \mathbb{1}_{j_s \leq \mu_x \leq i-1}, x \in \mathcal{X}_s; \mathbb{1}_{j_s \leq \mu_x \leq i-1}, x \notin \mathcal{X}_s) \\ &= \sum_{(c_x)_{x \in \mathcal{X}} \in \{0,1\}^{\mathcal{X}}} H(\varphi_i | \mathbb{1}_{j_s \leq \mu_x \leq i-1} = c_x, x \in \mathcal{X}_s) \\ &\quad \times \Pr(\mathbb{1}_{j_s \leq \mu_x \leq i-1} = c_x, x \in \mathcal{X}_s). \end{aligned}$$

Denote by  $V_s \subseteq \{0,1\}^{\mathcal{X}}$  the collection of  $(c_x)_{x \in \mathcal{X}}$  satisfying  $\sum_{x \in \mathcal{X}_s} c_x < |\mathcal{X}_s|/2$ . The above derivation shows that

$$\sum_{(c_x)_{x \in \mathcal{X}} \in V_s} \Pr(\mathbb{1}_{j_s \leq \mu_x \leq i-1} = c_x, x \in \mathcal{X}_s) \geq \frac{1}{2}.$$

By independence, for any  $(c_x)_{x \in \mathcal{X}} \in V_s$ , we have

$$\begin{aligned} (\varphi_i | \mathbb{1}_{j_s \leq \mu_x \leq i-1} = c_x, x \in \mathcal{X}_s) &= \sum_{x \in \mathcal{X}: c_x=0} (\mathbb{1}_{\mu_x=i} | \mathbb{1}_{j_s \leq \mu_x \leq i-1} = 0) \\ &= \sum_{x \in \mathcal{X}_s: c_x=0} (\mathbb{1}_{\mu_x=i} | \mathbb{1}_{j_s \leq \mu_x \leq i-1} = 0) \\ &\quad + \sum_{x \notin \mathcal{X}_s: c_x=0} (\mathbb{1}_{\mu_x=i} | \mathbb{1}_{j_s \leq \mu_x \leq i-1} = 0). \end{aligned}$$

For any  $x \in \mathcal{X}_s$  with  $c_x = 0$ , the corresponding indicator variable satisfies

$$\begin{aligned} \mathbb{E}[\mathbb{1}_{\mu_x=i} | \mathbb{1}_{j_s \leq \mu_x \leq i-1} = 0] &= \frac{\Pr(\mathbb{1}_{\mu_x=i} \text{ and } \mu_x \notin [j_s, i-1])}{\Pr(\mu_x \notin [j_s, i-1])} \\ &= \frac{\Pr(\mathbb{1}_{\mu_x=i})}{1 - \Pr(\mu_x \in [j_s, i-1])} \\ &= \frac{\frac{1}{L_j} \left[ \frac{1}{9}, \frac{1}{2} \right]}{1 - \left[ 0, \frac{L_j}{5} \right] \cdot \frac{1}{L_j} \left[ \frac{1}{9}, \frac{1}{2} \right]} \\ &= \frac{1}{L_j} \left[ \frac{1}{9}, \frac{5}{9} \right]. \end{aligned}$$

On the other hand, for any  $x \notin \mathcal{X}_s$ ,

$$e^{-np_x} \frac{(np_x)^i}{i!} \leq e^{-i} \frac{i^i}{i!} \leq \frac{1}{\sqrt{2\pi i}} \leq \frac{1}{2L_j}.$$

Therefore, the corresponding indicator variable satisfies

$$\mathbb{E}[\mathbb{1}_{\mu_x=i} | \mathbb{1}_{j_s \leq \mu_x \leq i-1} = 0] = \frac{\Pr(\mathbb{1}_{\mu_x=i})}{1 - \Pr(\mu_x \in [j_s, i-1])} \leq \frac{\frac{1}{L_j} [0, \frac{1}{2}]}{1 - [0, \frac{L_j}{5}] \cdot \frac{1}{L_j} [0, \frac{1}{2}]} \leq \frac{5}{9} \cdot \frac{1}{L_j}.$$

To summarize, we have shown that  $(\varphi_i | \mathbb{1}_{j_s \leq \mu_x \leq i-1} = c_x, x \in \mathcal{X}_s)$  is the sum of  $|\mathcal{X}|$  independent Bernoulli random variables. Among these Bernoulli variables, at least  $|\mathcal{X}_s|/2 \geq p_{I_j}/(2\sqrt{\log n})$  have a bias of  $\frac{1}{L_j} [\frac{1}{9}, \frac{5}{9}]$ , while others have a bias of at most  $\frac{5}{9} \cdot \frac{1}{L_j}$ .

The following lemma, recently established by Hillion et al. [2019], shows the relation among the entropy values of sums of independent Bernoulli random variables with different bias parameters.

**Lemma 4.** *Let  $X_t, Y_t, t \in [m]$  be independent indicator random variables. Denote by  $X$  and  $Y$  the sums of  $X_t$ 's and  $Y_t$ 's, respectively. If  $\mathbb{E}[X_t] \leq \mathbb{E}[Y_t] \leq 1/2, \forall t \in [m]$ ,*

$$H\left(\sum_t X_t\right) \leq H\left(\sum_t Y_t\right).$$

This lemma, together with the previous results, shows that

$$H(\varphi_i | \mathbb{1}_{j_s \leq \mu_x \leq i-1} = c_x, x \in \mathcal{X}_s) \geq H(\text{bin}(p_{I_j}/(2\sqrt{\log n}), 1/(9L_j))).$$

The next lemma further bounds the entropy of a binomial random variable.

**Lemma 5.** *For any  $m > 1$  and  $q \in [1/m, 1 - 1/m]$ ,*

$$H(\text{bin}(m, q)) \geq \frac{1}{2} \log \left( (2\pi)^{1-(1-q)^m - q^m} m q (1-q) \right) - \frac{1}{12m}.$$

*Proof.* By definition, the left-hand side satisfies

$$\begin{aligned} H(\text{bin}(m, q)) &= - \sum_{t=0}^m \binom{m}{t} q^t (1-q)^{m-t} \log \left( \binom{m}{t} q^t (1-q)^{m-t} \right) \\ &= - \sum_{t=0}^m \binom{m}{t} q^t (1-q)^{m-t} (t \log q + (m-t) \log(1-q)) \\ &\quad + \log m! - \log t! - \log(m-t)! \\ &= mH(\text{Bern}(q)) - \log m! + \sum_{t=0}^m \binom{m}{t} q^t (1-q)^{m-t} (\log t! + \log(m-t)!). \end{aligned}$$

By Stirling's formula, for any  $t \geq 1$ ,

$$\log t! \geq \left(t + \frac{1}{2}\right) \log t + \frac{1}{2} \log(2\pi) - t.$$

Substituting the right-hand side into the above equation yields

$$\begin{aligned} S_m(q) := \sum_{t=0}^m \binom{m}{t} q^t (1-q)^{m-t} \log t! &\geq \frac{1}{2} (1 - (1-q)^m) \log(2\pi) - m q \\ &\quad + \sum_{t=1}^m \binom{m}{t} q^t (1-q)^{m-t} \left(t + \frac{1}{2}\right) \log t. \end{aligned}$$

Let  $g(x) := 0$  for  $x \in [0, 1)$  and  $g(x) := (x + 1/2) \log x$  for  $x \geq 1$ . Simple calculus shows that the function is concave. Applying the concavity of  $g$  to the last sum yields

$$\sum_{t=1}^m \binom{m}{t} q^t (1-q)^{m-t} \left(t + \frac{1}{2}\right) \log t \geq g \left( \sum_{t=1}^m \binom{m}{t} q^t (1-q)^{m-t} \cdot t \right) = \left(mq + \frac{1}{2}\right) \log(mq),$$



where the last step follows by the fact that  $mq \geq 1$ . A similar inequality holds for the weighted sum of  $\log(m-t)!$ . Consolidating these inequalities, we obtain

$$\begin{aligned} S_m(q) + S_m(1-q) &\geq \left(mq + \frac{1}{2}\right) \log(mq) + \left(m(1-q) + \frac{1}{2}\right) \log(m(1-q)) \\ &\quad + \frac{1}{2}(1 - (1-q)^m) \log(2\pi) - mq + \frac{1}{2}(1 - q^m) \log(2\pi) - m(1-q) \\ &= (m+1) \log m - mH(\text{Bern}(q)) + \frac{1}{2} \log(q(1-q)) \\ &\quad + \frac{1}{2}(2 - (1-q)^m - q^m) \log(2\pi) - m. \end{aligned}$$

On the other hand, for the  $\log m!$  term,

$$\log m! \leq \left(m + \frac{1}{2}\right) \log m + \frac{1}{2} \log(2\pi) - m + \frac{1}{12m}.$$

Substituting the previous term bounds into the  $H(\text{bin}(m, q))$  expression yields

$$\begin{aligned} H(\text{bin}(m, q)) &= mH(\text{Bern}(q)) - \log m! + S_m(q) + S_m(1-q) \\ &\geq \frac{1}{2} \log \left( (2\pi)^{1-(1-q)^m - q^m} mq(1-q) \right) - \frac{1}{12m}. \quad \square \end{aligned}$$

Before continuing, we remark that the bound in the above lemma has the right dependence on  $mq(1-q)$  in the sense that if we fix  $q$  and increase  $m$ , the lower bound converges to  $\frac{1}{2} \log(\Theta(mq(1-q)))$ . Another point to mention is that the above bound covers  $q \in [1/m, 1 - 1/m]$ , while Lemma 6 appearing later in this section covers  $q \notin [1/m, 1 - 1/m]$ . Note that the dependence on  $mq(1-q)$  changes from logarithmic to linear, showing an ‘‘elbow effect’’ around  $1/m$ .

Assume that  $p_{I_j}/(2\sqrt{\log n}) \geq 9L_j$ , then for any  $(c_x)_{x \in \mathcal{X}} \in V_s$ ,

$$H(\varphi_i | \mathbb{1}_{j_s \leq \mu_x \leq i-1} = c_x, x \in \mathcal{X}_s) \geq H(\text{bin}(p_{I_j}/(2\sqrt{\log n}), 1/(9L_j))) \geq \frac{1}{2}.$$

Consolidating this with the previous results yields that

$$H(\varphi_i | \varphi_{j_s}, \dots, \varphi_{i-1}) \geq \sum_{(c_x)_{x \in \mathcal{X}} \in V_s} \frac{1}{2} \cdot \Pr(\mathbb{1}_{j_s \leq \mu_x \leq i-1} = c_x, x \in \mathcal{X}_s) \geq \frac{1}{2} \cdot \frac{1}{2} = \frac{1}{4},$$

where we utilize  $p_{I_j}/(2\sqrt{\log n}) \geq 9L_j \geq 9$  and  $(1-q)^m + q^m < 1/e$  for  $\forall m \geq 3, q \in [1/m, 1/2]$ . We can then bound the quantity of interest as follows.

$$\begin{aligned} H((\varphi_i)_{i \in nI_j^s}) &= \sum_{i=j_s}^{j_s+L_j-1} H(\varphi_i | \varphi_{j_s}, \dots, \varphi_{i-1}) \\ &\geq \sum_{i=j_s}^{j_s+L_j/5} H(\varphi_i | \varphi_{j_s}, \dots, \varphi_{i-1}) \\ &\geq \frac{L_j}{5} \cdot \frac{1}{4} = \frac{L_j}{20} \\ &= \frac{1}{20\sqrt{\log n}} \min \{p_{I_j}, j \cdot \log n\}. \end{aligned}$$

On the other hand, if  $9L_j \geq p_{I_j}/(2\sqrt{\log n}) \gg 1$ , we can further ‘‘compress’’ the truncated profile  $(\varphi_i)_{i \in nI_j^s}$  over  $nI_j^s$  to reduce the effective value of  $L_j$ . Specifically, for any integer  $t < L_j$ , we define the  $t$ -compressed version of  $(\varphi_i)_{i \in nI_j^s}$  as

$$(\varphi_i)_{i \in nI_j^s}^t := \left( \sum_{i=j_s+(\ell-1)t}^{j_s+\ell t-1} \varphi_i \right)_{\ell \in [L_j/t]}.$$

Note that for each  $t$ , the length of  $(\varphi_i)_{i \in nI_j^s}$  is  $L_j^t := L_j/t$ . For each entry in the compressed version, we can again express the entry as the sum of independent indicator random variables. Specifically,

$$\sum_{i=j_s+(\ell-1)t}^{j_s+\ell t-1} \varphi_i = \sum_{x \in \mathcal{X}} \mathbb{1}_{\mu_x \in [j_s+(\ell-1)t, j_s+\ell t-1]}.$$

Furthermore, for any  $x \in \mathcal{X}_s$ , the expectation of each indicator variable satisfies

$$\begin{aligned} \mathbb{E}[\mathbb{1}_{\mu_x \in [j_s+(\ell-1)t, j_s+\ell t-1]}] &= \sum_{i=j_s+(\ell-1)t}^{j_s+\ell t-1} e^{-np_x} \frac{(np_x)^i}{i!} \\ &= \frac{t}{L_j} \left[ \frac{1}{9}, \frac{1}{2} \right] = \frac{1}{L_j^t} \left[ \frac{1}{9}, \frac{1}{2} \right]. \end{aligned}$$

Similarly, for any  $x \in \mathcal{X}$ , we have  $\mathbb{E}[\mathbb{1}_{\mu_x \in [j_s+(\ell-1)t, j_s+\ell t-1]}] \leq 1/(2L_j^t)$ .

Now, choose  $t$  large enough so that  $18L_j^t \geq p_{I_j}/(2\sqrt{\log n}) \geq 9L_j^t$ . Following the reasoning in the previous case shows that

$$H((\varphi_i)_{i \in nI_j^s}) \geq H((\varphi_i)_{i \in nI_j^s}^t) \geq \Omega\left(\frac{1}{\sqrt{\log n}} \min\{p_{I_j}, j \cdot \log n\}\right).$$

It remains to consider the case of  $\mathcal{O}(\sqrt{\log n}) \geq p_{I_j} \geq 1$ , for which we adopt our previous analysis.

Again, partition  $I_j$  into sub-intervals of equal length  $L_j/n$ . Then, assign each probability  $p_x \in I_j$  a length- $L_j/n$  interval  $I_{p_x}$  centered at  $p_x$ . By construction, each interval  $I_{p_x}$  covers at least one of the sub-intervals in the partition. Redefine any of these covered sub-intervals as  $I_j^s$ . Denote by  $\mathcal{X}_s$  the collection of symbols corresponding to the covering intervals.

Note that  $\mathcal{O}(\sqrt{\log n}) \geq p_{I_j} \geq |\mathcal{X}_s| \geq 1$ . For any  $i \in [j_s, j_s+L_j/5]$ , the previous analysis shows that

$$H(\varphi_i | \varphi_{j_s}, \dots, \varphi_{i-1}) \geq H(\text{bin}(|\mathcal{X}_s|, 1/(9L_j)) \cdot (1 - 3/4)).$$

We bound the right-hand side with the following lemma.

**Lemma 6.** For any  $m \geq 1$ , and  $q \leq \min\{1/2, 1/m\}$  or  $q \geq \max\{1/2, 1 - 1/m\}$ ,

$$H(\text{bin}(m, q)) \geq \frac{m}{4} \min\{q, 1 - q\} \geq \frac{1}{4}mq(1 - q).$$

*Proof.* By symmetry, we need to consider only the case of  $q \in [0, 1/m]$ .

$$\begin{aligned} H(\text{bin}(m, q)) &\geq H(\mathbb{1}_{\text{bin}(m, q) \geq 1}) \\ &= H(((1 - q)^m, 1 - (1 - q)^m)) \\ &\geq -(1 - q)^m (m \log(1 - q)) \\ &\geq -\frac{m}{4} \log(1 - q) \\ &\geq \frac{m}{4} \cdot q. \end{aligned} \quad \square$$

Consolidating the lemma and the chain rule of entropy yields,

$$\begin{aligned} H((\varphi_i)_{i \in nI_j^s}) &= \sum_{i=j_s}^{j_s+L_j-1} H(\varphi_i | \varphi_{j_s}, \dots, \varphi_{i-1}) \\ &\geq \sum_{i=j_s}^{j_s+L_j/5} H(\varphi_i | \varphi_{j_s}, \dots, \varphi_{i-1}) \\ &\geq \frac{L_j}{5} \cdot \frac{|\mathcal{X}_s|}{4 \cdot 9 \cdot L_j} \cdot \left(1 - \frac{3}{4}\right) = \frac{|\mathcal{X}_s|}{720} \\ &= \Omega\left(\frac{1}{\sqrt{\log n}} \min\{p_{I_j}, j \cdot \log n\}\right). \end{aligned}$$

Alternatively, we can use the fact that adding independent random variables does not decrease entropy, i.e.,  $H(Y + Z) \geq H(Y)$  for any independent variables  $Y$  and  $Z$ . Note that

$$(\varphi_i)_{i \in nI_j^s}^t = \sum_{x \in \mathcal{X}} (\mathbb{1}_{\mu_x=i})_{i \in I_j^s}.$$

Let  $y$  be an arbitrary symbol that belongs to  $\mathcal{X}_s$ . Then,

$$H((\varphi_i)_{i \in nI_j^s}) \geq H((\varphi_i)_{i \in nI_j^s}^t) \geq H((\mathbb{1}_{\mu_y=i})_{i \in I_j^s}) \geq H((\mathbb{1}_{\mu_y=j_s}, \mathbb{1}_{\mu_y=j_s+1})).$$

By the previous derivations, both  $\Pr(\mu_y = j_s)$  and  $\Pr(\mu_y = j_s + 1)$  belong to  $\frac{1}{L_j}[1/9, 1/2]$ . Hence,

$$H((\varphi_i)_{i \in nI_j^s}) \geq H\left(\text{Bern}\left(\frac{2}{11}\right)\right) \geq \frac{2}{5} = \Omega\left(\frac{1}{\sqrt{\log n}} \min\{p_{I_j}, j \cdot \log n\}\right).$$

Note that this argument does not apply to other cases, since

$$H((\mathbb{1}_{\mu_y=i})_{i \in I_j^s}) = \mathcal{O}(\log L_j) = \mathcal{O}(\log n),$$

while  $\min\{p_{I_j}, j \cdot \log n\}$  can be as large as  $\tilde{\Theta}(n^{1/3})$  in general.

The proof is complete upon noting that indices with  $j = \mathcal{O}(1)$  corresponds to a total contribution of at most  $\mathcal{O}(1)$  to  $H_n^S(p)$  and  $H_n^S(p) = \tilde{\Theta}(\mathbb{E}[\mathcal{D}(\varphi)]) = \tilde{\Theta}(D(\varphi))$ , with probability at least  $1 - \mathcal{O}(1/\sqrt{n})$ .

**Summary** The simple expression shows that  $\mathcal{H}_n^S(p)$  characterizes the variability of ranges that the actual probabilities spread over. As Theorem 11 shows,  $\mathcal{H}_n^S(p)$  closely approximates  $E_n(p)$ , the value around which  $\mathcal{D}_n \sim p$  concentrates (Theorem 9) and  $\mathcal{H}_n(p)$  lies (Theorem 1). Henceforth, we use  $\mathcal{H}_n^S(p)$  as a proxy for both  $\mathcal{H}_n(p)$  and  $\mathcal{D}_n$ , and study its attributes and values.

Let  $p \in \Delta$  be an arbitrary discrete distribution. Recall that in Section A, we partition the unit interval into a sequence of ranges,

$$I_j := \left( (j-1)^2 \frac{\log n}{n}, j^2 \frac{\log n}{n} \right], 1 \leq j \leq \sqrt{\frac{n}{\log n}},$$

denote by  $p_{I_j}$  the number of probabilities  $p_x$  belonging to  $I_j$ , and relate  $E_n(p)$  to an induced shape-reflecting quantity,

$$\mathcal{H}_n^S(p) := \sum_{j \geq 1} \min\{p_{I_j}, j \cdot \log n\},$$

the sum of the effective number of probabilities lying within each range.

The simple expression of  $\mathcal{H}_n^S(p)$  shows that it characterizes the variability of ranges the actual probabilities spread over. As Theorem 11 shows,  $\mathcal{H}_n^S(p)$  closely approximates  $E_n(p)$ , the value around which  $\mathcal{D}_n \sim p$  concentrates (Theorem 9) and  $\mathcal{H}_n(p)$  lies (Theorem 1). In this section, we use  $\mathcal{H}_n^S(p)$  as a proxy for both  $\mathcal{H}_n(p)$  and  $\mathcal{D}_n$ , and study its attributes and values.

To further our understanding of profile entropy and dimension, in the next two sections, we investigate the analytical attributes of  $\mathcal{H}_n^S(p)$  concerning monotonicity and Lipschitzness.

#### A.4 Extension: Profile Entropy Estimation via Monotonicity

Among the many attributes that  $\mathcal{H}_n^S(p)$  possesses, monotonicity is perhaps most intuitive. One may expect a larger value of  $\mathcal{H}_n^S(p)$  as the sample size  $n$  increases, since additional observations reveal more information on the variability of probabilities. Below we confirm this intuition.

**Theorem 12.** For any  $n \geq m \gg 1$  and  $p \in \Delta$ ,

$$\mathcal{H}_n^S(p) \geq H_m^S(p).$$

The above result that lower bounds  $\mathcal{H}_n^S(p)$  with  $H_m^S(p)$  for  $m \leq n$ . Besides this, a more desirable result is to upper bound  $\mathcal{H}_n^S(p)$  with some function of  $H_m^S(p)$ . Such a result will enable us to draw a sample of size  $m \leq n$ , obtain an estimate of  $H_m^S(p)$  from  $\mathcal{D}_m$  (by the entropy-dimension equivalence), and use it to bound the value of  $\mathcal{H}_n^S(p)$  for a much larger sample size  $n$ .

With such an estimate, we can perform numerous tasks such as *predicting* the performance of PML when more observations are available, or the space needed for storing the profile of a longer sample sequence. These applications are closely related to the recent works on *learnability estimation* by Kong and Valiant [2018], Kong et al. [2019], namely, one wish to know how many (additional) observations are required for a learning algorithm to achieve a certain level of performance.

The next theorem provides a simple and tight upper bound on  $\mathcal{H}_n^S(p)$  in terms of  $H_m^S(p)$ .

**Theorem 13.** For any  $n \geq m \gg 1$  and  $p \in \Delta$ ,

$$\mathcal{H}_n^S(p) \leq \sqrt{\frac{n \log n}{m \log m}} \cdot H_m^S(p).$$

**Estimation** Before continuing to the proof, we present some direct implications.

1. If for  $m = \Omega(n^{0.01})$ , we have  $H_m^S(p) \ll \sqrt{m}$ , then  $H_n^S(p) \ll \sqrt{n}$ .
2. For any two integers  $m \leq n$  and distribution  $p$ ,

$$\frac{H_m^S(p)}{\sqrt{m \log m}} \geq \frac{H_n^S(p)}{\sqrt{n \log n}}.$$

In other words, the sequence  $A_m := H_m^S(p)/\sqrt{m \log m}$ ,  $m \leq n$ , is monotonically decreasing and converges to  $A_n$ . As we increase the value of  $m$ ,  $(\sqrt{n \log n} \cdot A_m)$ , which can be viewed as our estimate of  $H_n^S(p)$ , is getting more and more accurate. For the purpose of adaptive estimation, if  $n = 2^t$ , we can choose  $m = 2^0, 2^1, \dots, 2^t$ .

*Proof.* Below we prove both the lower and upper bounds. For clarity, denote by  $p(m, j)$  the value of  $p_{I_j}$  corresponding to  $H_m^S(p)$ , and  $p(n, j)$  the value of  $p_{I_j}$  corresponding to  $H_n^S(p)$ . Furthermore, denote  $r := \sqrt{(n/m)((\log m)/\log n)}$ , which is treated as an integer. Then, by the definition of  $H^S$ ,

$$\begin{aligned} rH_m^S(p) &= r \sum_{j \geq 1} \min \{p(m, j), j \cdot \log m\} \\ &= \sum_{j \geq 1} \min \left\{ r \cdot \sum_{i=rj-r+1}^{rj} p(n, i), rj \cdot \log m \right\} \\ &\geq \sum_{j \geq 1} \sum_{t=0}^{r-1} \min \left\{ \sum_{i=rj-r+1}^{rj} p(n, i), (rj-t) \cdot \log m \right\} \\ &\geq \sum_{j \geq 1} \sum_{t=0}^{r-1} \min \{p(n, rj-t), (rj-t) \cdot \log m\} \\ &= \sum_{i \geq 1} \min \{p(n, i), i \cdot \log m\} \\ &\geq \frac{\log m}{\log n} \cdot H_n^S(p). \end{aligned}$$

The lower-bound part basically follows by reversing the above inequalities.

$$\begin{aligned}
H_n^S(p) &= \sum_{i \geq 1} \min \{p(n, i), i \cdot \log n\} \\
&= \sum_{j \geq 1} \sum_{t=0}^{r-1} \min \{p(n, rj - t), (rj - t) \cdot \log n\} \\
&\geq \sum_{j \geq 1} \sum_{t=0}^{r-1} \min \{p(n, rj - t), (rj - r + 1) \cdot \log n\} \\
&\geq \sum_{j \geq 1} \min \left\{ \sum_{t=0}^{r-1} p(n, rj - t), (rj - r + 1) \cdot \log n \right\} \\
&= \sum_{j \geq 1} \min \{p(m, j), (rj - r + 1) \cdot \log m\} \\
&\geq H_m^S(p).
\end{aligned}$$

This completes the proof of the theorem.  $\square$

### A.5 Extension: Lipschitzness of Profile Entropy

Note that we can view  $\mathcal{H}_n^S(p)$  as a distribution property. In this section, we establish the Lipschitzness of  $\mathcal{H}_n^S(p)$  under a weighted Hamming distance and the  $\ell_1$  distance between distributions. Precisely, given two distributions  $p, q \in \Delta$ , the vanilla *Hamming distance* is denoted by

$$h(p, q) := \sum_x \mathbb{1}_{p_x \neq q_x}.$$

This may not be suitable for the purpose of statistical inference since the two distributions could differ at many symbols, while these symbols account for only a negligible total probability and has little effects on most induced statistics. To address this, we propose a *weighted Hamming distance*

$$h_{\mathcal{W}}(p, q) := \sum_{x \in \mathcal{X}} \max\{p_x, q_x\} \cdot \mathbb{1}_{p_x \neq q_x}.$$

The next result measures the Lipschitzness of  $H_n^S$  under  $h_{\mathcal{W}}$ .

**Theorem 14.** *For any integer  $n$ , and distributions  $p$  and  $q$ , if  $h_{\mathcal{W}}(p, q) \leq \varepsilon$  for some  $\varepsilon \geq 1/n$ ,*

$$|\mathcal{H}_n^S(p) - H_n^S(q)| \leq \tilde{O}(\sqrt{\varepsilon n}).$$

*Proof.* Recall that the quantity of interest is

$$\mathcal{H}_n^S(p) := \sum_{j \geq 1} \min \{p_{I_j}, j \cdot \log n\}.$$

Given the bound of  $h_{\mathcal{W}}(p, q) \leq \varepsilon$ , we denote by  $\mathcal{Y}$  the collection of symbols  $x$  at which  $p_x \neq q_x$ . By definition, we have both  $\sum_{x \in \mathcal{Y}} p_x \leq \varepsilon$  and  $\sum_{x \in \mathcal{Y}} q_x \leq \varepsilon$ . Below, we show that these symbols modify the value of  $\mathcal{H}_n^S(p)$  by at most  $\tilde{O}(\sqrt{\varepsilon n})$ . By symmetry, the same claim also holds for the distribution  $q$ . Combining the two claims yields the desired result.

First, we consider  $x \in \mathcal{Y}$  satisfying  $p_x = 0$  or  $p_x \in I_1 = (0, (\log n)/n]$ . Such a symbol either does not contribute the value of  $\mathcal{H}_n^S(p)$ , or affects only the value of the first term  $\min \{p_{I_1}, \log n\}$ , which is at most  $\log n$ . Hence the claim holds for this case.

Next, consider symbols  $x \in \mathcal{Y}$  satisfying  $p_x \in I_j = ((j-1)^2 \frac{\log n}{n}, j^2 \frac{\log n}{n}]$  for some  $j \geq 2$  and denote the collection of them by  $\mathcal{Z} \subseteq \mathcal{Y}$ . By the above assumption, we have  $\sum_{x \in \mathcal{Z}} p_x \leq \varepsilon$ . To maximize their impact on  $\mathcal{H}_n^S(p)$  under this constraint, we should set their values to be

$$p_j := (j-1)^2 \frac{\log n}{n}, \quad j = 2, \dots, J,$$

for some  $J$  to be determined, where each  $p_j$  repeats exactly  $j \log n$  times. Then, the symbols in  $\mathcal{Z}$  contributes at most  $\sum_{j=2}^J j \log n = (\log n)(J-1)(J+2)/2$  to  $\mathcal{H}_n^S(p)$ , and the above constraint on the total probability mass bounds transforms to

$$\varepsilon \geq \sum_{x \in \mathcal{Z}} p_x \geq \sum_{j=2}^J (j \log n) \cdot (j-1)^2 \frac{\log n}{n} \geq \frac{(\log n)^2}{12n} J(J-1)(-2+3J).$$

Therefore in this case, the contribution is again  $\tilde{\mathcal{O}}(\sqrt{\varepsilon n})$ , which completes the proof.  $\square$

Replacing  $\max\{p_x, q_x\}$  with  $|p_x - q_x|$  induces a common similarity measure, the  $\ell_1$  distance. The next theorem is an analog to Theorem 14 under this classical distance.

**Theorem 15.** *For any integer  $n$ , and distributions  $p$  and  $q$ , if  $\ell_1(p, q) \leq \varepsilon$  for some  $\varepsilon \geq 0$ ,*

$$|\mathcal{H}_n^S(p) - cH_n^S(q)| \leq \mathcal{O}((\varepsilon n)^{2/3}),$$

where  $c$  is a constant in  $[1/3, 3]$ . Note that the inequality is significant iff  $\varepsilon \leq \tilde{\Theta}(1/n^{1/4})$ , since the value of  $\mathcal{H}_n^S(p)$  is at most  $\mathcal{O}(\sqrt{n \log n})$  for all  $p$ .

By symmetry, it suffices to prove that under the conditions in Theorem 15,

$$H_n^S(p) \leq 3H_n^S(q) + \mathcal{O}((\varepsilon n)^{2/3}).$$

*Proof.* Consider the optimization problem of modifying  $p$  by at most  $\varepsilon$  and maximizing the increase in  $H_n^S(p)$ . For each  $j$  and each probability  $p_x \in j$ , denote by  $p'_x$  the modified value. Depending on the location of  $p'_x$ , there are three types of possible modifications, as illustrated below.

- For the first type, we still have  $p'_x \in I_j$ . This does not change the value of  $p_{I_j}$  and hence does not increase  $H_n^S(p)$ .
- For the second type, we have  $p'_x \in I_{j-1}$  or  $p'_x \in I_{j+1}$ . If  $p_{I_j} \leq j \cdot \log n$ , this will decrease the value of  $\min\{p_{I_j}, j \cdot \log n\}$  by 1 and increase the value of  $\min\{p_{I_{j-1}}, (j-1) \cdot \log n\}$  or  $\min\{p_{I_{j+1}}, (j+1) \cdot \log n\}$  by at most one. Hence in this case, the value of  $H_n^S(p)$  can only decrease. If  $p_{I_j} > j \cdot \log n$ , then  $\min\{p_{I_j}, j \cdot \log n\} = j \cdot \log n$ . For a particular  $j$ , all such modifications can increase the value of  $H_n^S(p)$  by at most  $(j-1) \log n + (j+1) \log n = 2j \log n$ , which is twice the value of  $\min\{p_{I_j}, j \cdot \log n\}$ . Hence, all such modifications, when combined, increase the value of  $H_n^S(p)$  by at most  $2H_n^S(p)$ .
- For the third type, we have  $p'_x \in I_i$  and  $|i-j| \geq 2$ . If  $i < j$ , we require a probability mass of at least  $((j-1)^2 \log n - i^2 \log n)/n \geq (i \log n)/n$ , where  $j \geq 3$ . If  $i > j$ , we require a probability mass of at least  $((i-1)^2 \log n - j^2 \log n)/n \geq (i \log n)/n$ . The number of such modifications that could lead to an increase in the value of  $H_n^S(p)$  is at most  $i \log n$ . For each  $i$ , let  $c_i$  denote the number of such modifications that will lead to an increase of  $H_n^S(p)$ . Then, the total increase is  $\sum_i c_i$ , each  $c_i$  is at most  $i \log n$ , and the total required probability mass required is at least  $\sum_i c_i \cdot (i \log n)/n \leq \varepsilon$ .

Let  $\{c_i\}$  be the optimal solution that maximizes  $\sum_i c_i$ . Assume that there are two indices  $i < j$  satisfying  $c_i < i \log n$  and  $c_j > 0$ . Then, if we replace  $c_i$  and  $c_j$  by  $c_i + 1$  and  $c_j - 1$ , respectively,  $\sum_i c_i$  will not change and  $\sum_i c_i \cdot (i \log n)/n$  will decrease. Hence, we can assume that there exists  $i'$  satisfying  $c_i = i \log n, \forall i < i'$  and  $c_i = 0, \forall i > i'$ . In addition, assuming  $\varepsilon n \geq \log n$  implies that  $i' \geq 2$ . Hence, we have  $\sum_i c_i \leq (\log n)i'(i'+1)/2$  and

$$\sum_i c_i \leq 3.5 \cdot \left( \frac{n\varepsilon}{\sqrt{\log n}} \right)^{2/3}. \quad \square$$

## B Competitive-Optimal Property Inference

### B.1 Theorem 3: Sufficiency of Profiles

Numerous practical applications call for inferring *property values* of an unknown distribution from its samples, such as entropy for graphical modeling [Koller and Friedman, 2009], Rényi entropy



for sequential decoding [Arikan, 1996], and support size for species richness estimation [Magurran, 2013]. Therefore, *property inference* has attracted considerable attention over the past few decades.

**Property inference** Formally, a *distribution property* over some collection  $P \subseteq \Delta$  is a functional  $f : P \rightarrow \mathbb{R}$  that associates with each distribution a real value. Given a sample  $X^n$  from an unknown distribution  $p \in P$ , the problem of interest is to infer the value of  $f(p)$ . For this purpose, we employ another functional  $\hat{f} : \mathcal{X}^* \rightarrow \mathbb{R}$ , an *estimator* mapping every sample to a real value. We measure the statistical efficiency of  $\hat{f}$  in approximating  $f$  over  $P$  by its *absolute error*  $|\hat{f}(X^n) - f(p)|$ .

Given  $X^n \sim p \in P$ , the *minimal absolute error rate*, or simply *error*, that  $\hat{f}$  achieves with probability at least  $9/10$  is  $r_n(p, \hat{f}) := \min\{r : \Pr(|\hat{f}(X^n) - f(p)| \leq r) \geq 9/10\}$ , where the dependence on  $f$  is *implicit*. While  $p$  is often unknown, the *worst-case error* of an estimator  $\hat{f}$  over all distributions in  $P$  is  $r_n(P, \hat{f}) := \max_{p \in P} r_n(p, \hat{f})$ , and the lowest worst-case error for  $P$ , achieved by the optimal estimator, is the *minimax error*  $r_n(P) := \min_{\hat{f}} r_n(P, \hat{f})$ .

**Symmetric properties** An important class of properties is the collection of symmetric ones, which encompasses numerous well-known distribution characteristics, such as Shannon entropy, Rényi entropy, support size, and  $\ell_1$  distance to the uniform distribution. Symmetry connects the estimation of such property to the sample profile, a sufficient statistic for the task in hand. The general principle of maximum likelihood then provides an intuitive estimator, *profile maximum likelihood (PML)* [Orlitsky et al., 2004], that maximizes the probability of observing the profile.

An estimator is *profile-based* if its values depends on only the profile. The theorem below shows that profile-based estimators are sufficient for inferring symmetric properties.

**Theorem 3** (Sufficiency of profiles). *For any symmetric property  $f$  and set  $P \subseteq \Delta$ , and estimator  $\hat{f}$ , we can construct an explicit estimator  $\hat{F}$  over length- $n$  profiles satisfying*

$$r_n(p, \hat{f}) = r_n(P, \hat{F} \circ \varphi),$$

where both estimators can have independent randomness.

*Proof.* First we show that given estimator  $\hat{f}$ , there is an estimator  $\hat{f}_s$  which is symmetric, i.e., invariant with respect to domain-symbol permutations, and achieves the same guarantee. To see this, consider a random permutation  $\tilde{\sigma}$  chosen uniformly randomly from the collection of permutations over the underlying alphabet. Let  $\hat{f}_s := \hat{f} \circ \tilde{\sigma}$ . Then for any  $p \in \mathcal{P}$ ,

$$\begin{aligned} \Pr_{X^n \sim p} \left( \left| \hat{f}_s(X^n) - f(p) \right| > \varepsilon \right) &\stackrel{(a)}{=} \Pr_{X^n \sim p} \left( \left| \hat{f} \circ \tilde{\sigma}(X^n) - f(p) \right| > \varepsilon \right) \\ &\stackrel{(b)}{=} \sum_{\sigma} \Pr_{X^n \sim p} \left( \left| \hat{f} \circ \sigma(X^n) - f(p) \right| > \varepsilon \mid \tilde{\sigma} = \sigma \right) \cdot \Pr(\tilde{\sigma} = \sigma) \\ &\stackrel{(c)}{=} \sum_{\sigma} \Pr_{X^n \sim p} \left( \left| \hat{f} \circ \sigma(X^n) - f(p) \right| > \varepsilon \right) \cdot \Pr(\tilde{\sigma} = \sigma) \\ &\stackrel{(d)}{=} \sum_{\sigma} \Pr_{X^n \sim \sigma(p)} \left( \left| \hat{f}(X^n) - f(\sigma(p)) \right| > \varepsilon \right) \cdot \Pr(\tilde{\sigma} = \sigma) \\ &\stackrel{(e)}{<} \sum_{\sigma} \delta \cdot \Pr(\tilde{\sigma} = \sigma) \\ &\stackrel{(f)}{=} \delta, \end{aligned}$$

where (a) follows by the definition of  $\hat{f}_s$ ; (b) follows by the law of total probability; (c) follows by the independence between  $\tilde{\sigma}$  and  $X^n$ ; (d) follows by the symmetry of  $f$  and the equivalence of applying  $\sigma$  to  $X^n$  and to  $p$ ; (e) follows by the fact that  $\sigma(p) \in \mathcal{P}$  and the guarantee satisfied by the estimator  $\hat{f}$ ; and (f) follows by the law of total probability.

Before we proceed further, we introduce the following definitions. For any sequence  $x^n$ , the *sketch* of a symbol  $x$  in  $x^n$  is the set of indices  $i \in [n]$  for which  $x_i = x$ . The *type* of a sequence  $x^n$  is the set  $\tau(x^n)$  of sketches of symbols appearing in  $x^n$ .

Since  $\hat{f}_s$  is symmetric, there exists a mapping  $\hat{f}_\tau$  over types satisfying  $\hat{f}_s = \hat{f}_\tau \circ \tau$ . Due to the i.i.d. assumption on the sample generation process, given the profile of a sample sequence, all the different types corresponding to this profile are equally likely. Let  $\Lambda$  be a mapping that recovers this relation, i.e.,  $\Lambda$  maps each profile uniformly randomly to a type having this profile.

Then, for any  $p \in \mathcal{P}$  and  $X^n \sim p$ ,

$$\hat{f}_s(X^n) = \hat{f}_\tau \circ \tau(X^n) = \hat{f}_\tau \circ \Lambda \circ \varphi(X^n).$$

Consequently, the mapping  $\hat{F} := \hat{f}_\tau \circ \Lambda$  is a profile-based estimator that satisfies

$$\Pr_{X^n \sim p} \left( \left| \hat{F}(\varphi(X^n)) - f(p) \right| > \varepsilon \right) = \Pr_{X^n \sim p} \left( \left| \hat{f}_s(X^n) - f(p) \right| > \varepsilon \right) < \delta, \forall p \in \mathcal{P}. \quad \square$$

## B.2 Theorem 4: Competitiveness of PML

Naturally and generally, we study symmetric property inference over a distribution collection  $\mathbb{P} \subseteq \Delta$  that is also *symmetric*, i.e., if  $p \in \mathbb{P}$ , then  $\mathbb{P}$  as well contains all the symbol-permuted versions of  $p$ . For every sample  $x^n \in \mathcal{X}^n$  and symmetric  $\mathbb{P}$ , the *PML estimator* over  $\mathbb{P}$  maps  $x^n$  to a distribution

$$\mathcal{P}_\varphi(x^n) := \arg \max_{p \in \mathbb{P}} \Pr_{X^n \sim p} (\varphi(X^n) = \varphi(x^n)).$$

Given a sample  $X^n \sim p \in \mathbb{P}$  and a symmetric property  $p$ , the PML plug-in estimator uses  $f \circ \mathcal{P}(X^n)$  to estimate  $f(p)$ . Recent researches [Acharya et al., 2017, Hao and Orlitsky, 2019a] show that for an extensive family of symmetric properties, including the previously mentioned four, the PML plug-in estimator *universally* achieves minimax error in the large-alphabet regime, up to constant factors.

The next result shows that the PML estimator is adaptive to the simplicity of underlying distributions in inferring all symmetric properties, over any symmetric  $\mathbb{P}$ . Specifically, the theorem states that the  $n$ -sample PML plug-in essentially performs as well as the optimal  $n/\mathcal{H}_n(p)$ -sample estimator, which approaches the performance of the optimal  $n$ -sample estimator if  $p$  has a small  $\mathcal{H}_n(p)$ . Furthermore, for any property and estimator, there is a symmetric set  $\mathbb{P}'$  for which this  $1/\mathcal{H}_n(p)$  ratio is *optimal*.

**Theorem 4** (Competitiveness of PML). *For any symmetric property  $f$  and set  $\mathbb{P} \subseteq \Delta$ , and every distribution  $p \in \mathbb{P}$ , the PML plug-in estimator satisfies*

$$r_n(p, f \circ \mathcal{P}_\varphi) \leq 2r_{n_p}(\mathbb{P}),$$

where  $n_p := n/\mathcal{H}_n(p)$ . *On the other hand, for any estimator  $\hat{f}$  and symmetric property  $f$ , there exists a symmetric set  $\mathbb{P}' \subseteq \Delta$  such that for some  $p \in \mathbb{P}'$ ,*

$$r_n(p, \hat{f}) \geq 2r_{n_p}(\mathbb{P}').$$

## B.3 Prior Work and Discussions

**Results** Recent years have shown interests in determining the limits of inferring symmetric distribution properties. Building upon worst-case analysis, the major contribution of these works is showing that for several specific properties, one can design more involved estimators whose worst-case performance is better than the empirical-distribution plug-in estimators (*empirical estimators*), over  $\Delta_{\mathcal{X}}$  for some *finite* alphabet  $\mathcal{X}$ . Note that  $\Delta_{\mathcal{X}}$  is a special symmetric distribution collection.

For example, the empirical estimator for Shannon entropy has a worst-case error rate of  $\Theta(|\mathcal{X}|/n)$ , whereas the minimax error rate is  $\Theta(|\mathcal{X}|/(n \log n))$  [Valiant and Valiant, 2011, 2013, Jiao et al., 2015, Wu and Yang, 2016, Acharya et al., 2017, Hao and Orlitsky, 2019a,c, 2020]. Similar results also hold for support size and  $\ell_1$  distance to the uniform distribution over  $\mathcal{X}$  (See [Valiant and Valiant, 2011, 2013, Acharya et al., 2017, Jiao et al., 2018, Wu et al., 2019, Hao and Orlitsky, 2019a,c, 2020]). One observation is that all these properties are in the form of  $\sum_x f_r(p_x)$ , where  $f_r$  is a relative smooth real function (for support size, one needs a lower bound like  $1/|\mathcal{X}|$  on the positive probabilities, which effectively smoothes the function).

It is apparent that most symmetric properties are not in the  $\sum_x f_r(p_x)$  form. A simple example is Rényi entropy, for which the learning error rates exhibit a significantly different behavior. Specifically, for a power parameter  $\alpha > 1$ ,  $\alpha \in \mathbb{N}$ , the minimax error of inferring Rényi entropy varies according to  $|\mathcal{X}|$  and  $n$  as follows [Acharya et al., 2016].

If  $n \lesssim |\mathcal{X}|^{1-1/\alpha}$  (sample-sparse regime), then  $r_n(\Delta_{\mathcal{X}}) \gtrsim \max_p f(p)$  (consistent estimation is impossible); if  $n \gtrsim |\mathcal{X}|^{1+1/\alpha}$  (large-sample regime), then  $r_n(\Delta_{\mathcal{X}}) \simeq (|\mathcal{X}|^{1-1/\alpha}/n)^{1/2}$ , which is *achieved* by the empirical estimator (trivial regime); if  $|\mathcal{X}|^{1-1/\alpha} \lesssim n \lesssim |\mathcal{X}|^{1+1/\alpha}$ , then the empirical estimator has an order  $\max\{|\mathcal{X}|/n, 1\}$  worst-case error, whereas the minimax error is  $(|\mathcal{X}|^{1-1/\alpha}/n)^{1/2}$  (potentially much lower than that of empirical).

The recent work of [Hao and Orlicsky \[2019a\]](#) significantly extends our understanding of symmetric property estimation by showing that the PML estimator is sample optimal for all  $\sum_x f_r(p_x)$  properties that are approximately *Lipschitz*, and is as good as the best known estimators for Rényi entropy of power  $\alpha > 3/4$ . The paper also presents results on other tasks such as testing.

Given the special structures, even the combination of all the properties mentioned above corresponds to only an extremely small subclass of symmetric properties. The general landscape for how the worst-case error rate behaves when we consider either the empirical or the minimax estimator is far from understood, even for just  $\Delta_{\mathcal{X}}$ . In fact, even for Rényi entropy, a simple and widely studied property, the minimax rates are not fully characterized – the lower and upper bounds in [Acharya et al. \[2016\]](#) for non-integer powers do not match in all parameter regimes. Ideally, there should be a set of formulas such that once the explicit form of  $f$  is available, the respective error rates can be computed, and more importantly, an explicit algorithm can be derived.

Our result pushes forward the general understanding of symmetric property estimation. It leverages the method of PML to derive competitive learning guarantees for all symmetric properties and distribution collections. The theorem even adapts itself to individual distributions, leading to numerous nontrivial estimation results without introducing sophisticated analysis or additional algorithms.

**Methods** As the task involves two components, the property and distribution (probability multiset), the design of statistical methods also advances in two veins.

The first vein concerns constructing a universal plug-in estimator for all *symmetric properties*. A symmetric property is invariant under symbol permutations, hence it suffices to obtain an accurate estimate of the probability multiset.

One method is PML, the approach that our theorem adopts. Recently, following the papers by [Das \[2012\]](#), [Acharya et al. \[2017\]](#), the work of [Hao and Orlicsky \[2019a\]](#) shows that for any symmetric property that is in the form of  $\sum_x f_r(p_x)$  and appropriately Lipschitz, both the profile maximum likelihood [[Orlicsky et al., 2004](#)] and its near-linear-time computable variant in [Charikar et al. \[2019b\]](#) achieve the optimal sample complexity up to small constant factors.

Another method is moment matching via linear programming (LP). In typical works using LP, such as [Valiant and Valiant \[2011, 2013, 2016\]](#), [Han et al. \[2018\]](#), one first estimates the (lower-order) moments of the underlying distributions (e.g.,  $\sum_x p_x^i$  for  $i \leq \log n$ ), which are also symmetric properties, and then finds a distribution through an LP method (up to domain-symbol permutations), whose lower order moments match with the estimates. These methods are known to achieve the minimax error rates over  $\Delta_{\mathcal{X}}$  for only a few specific properties, such as entropy, support size (also assume a  $1/|\mathcal{X}|$  lower bound on the positive probabilities), and  $\ell_1$ -distance to the uniform distribution.

The second vein of methods addresses the bias of empirical estimators and (often partially) replaces the given property by a bias-corrected polynomial, for which we can efficiently construct a near-unbiased estimator. There are mainly three different types of constructions for the bias-corrected polynomial: using classical minimax approximation [[Jiao et al., 2015, 2018](#), [Wu and Yang, 2016](#), [Wu et al., 2019](#), [Hao and Orlicsky, 2019c](#)], applying smoothing techniques to the coefficients of the unbiased estimator [[Orlicsky et al., 2016](#), [Hao et al., 2018](#), [Hao and Li, 2020](#)], and computing the derivative of the (property’s) Bernstein polynomial and employing the integral of its minimax approximation [[Hao and Orlicsky, 2020](#)].

Early works in this direction address specific properties, such as entropy [[Jiao et al., 2015](#), [Wu and Yang, 2016](#)], support size [[Wu et al., 2019](#)], support coverage [[Orlicsky et al., 2016](#)], and  $\ell_1$ -distance to the uniform distribution [[Jiao et al., 2018](#)], and determine their respective minimax error rates. Recent works consider broader families of properties [[Hao et al., 2018](#), [Hao and Orlicsky, 2019c, 2020](#), [Hao and Li, 2020](#)], in particular those in the  $\sum_x f_r(p_x)$  form and appropriately Lipschitz. Besides these results, some state-of-the-art Rényi entropy estimators [[Acharya et al., 2016](#)] also use polynomial approximation. Excluding properties in these special forms, it is unknown whether these techniques/methods work for the large amount of symmetric properties in general, even just over  $\Delta_{\mathcal{X}}$ .

**Outline** The rest of Appendix B presents the proof of our result on PML. For clarity, we divide the full proof into three parts: a) the sufficiency of profiles for estimating symmetric properties (already established above); b) the standard “median trick” often used to boost the confidence of learning algorithms; c) the PML method and its competitiveness to the min-max estimators. As one may expect, the proof utilizes several previously established results.

#### B.4 Proof of Theorem 4

**Proof outline** We begin with a proof sketch on the high level. While our theorem states only a constant-error-probability result for the vanilla PML, the guarantee holds for approximations of PML and any general error probability bound  $\delta$ , and this outline corresponds to the general setting.

- 1 For simplicity, let  $k$  denote the (expected or high-probability) dimension of a length- $n$  profile from an unknown  $p \in \Delta$ , and refer to the actual random quantity  $\mathcal{D}_n \sim p$  as “dimension”.
- 2 Let’s say  $p \in \mathcal{P}$  (which is symmetric), and we have an  $m$ -sample estimator over  $\mathcal{P}$  with an  $(\varepsilon, \delta)$  guarantee, i.e., for every distribution in  $\mathcal{P}$ , the estimator learns its property value up to an  $\varepsilon$  error, with probability at least  $1 - \delta$ . In addition, we assume that  $m \ll n$  with the ratio  $r := n/m$  to be determined.
- 3 Now, assume that  $r$  has been properly chosen, and we could utilize at most  $r$  copies of the  $m$ -sample estimator to construct an  $n$ -sample  $(\varepsilon, \delta \cdot \exp(-2k))$  estimator (the existence of  $r$  follows by the standard “median trick”). Furthermore, by the sufficiency of profiles (Theorem 3), there is a profile-based estimator that achieves the same guaranty.
- 4 Divide all length- $n$  profiles into two groups: one group with dimension at most of order  $k$  (hiding logarithmic factors), the other with dimension much larger than  $k$ .
- 5 By the concentration of sample profile dimensions (e.g., Theorem 9), the profile of an arbitrary sample from  $p$  belongs to the first group with high probability (say at least  $1 - 1/n$ ), we can safely ignore the second group.
- 6.1 Pick a profile from “the first group”, if its probability is  $\gg \delta \cdot \exp(-k)$ , the approximate PML (APML) will have a probability of  $\gg \delta \cdot \exp(-2k)$ . Here, the definition of APML is based on profile probabilities – for every length- $n$  sample, its profile probability under the true distribution and the APML estimate should differ by a factor of at most  $\exp(k)$  (more generally, a fixed factor of at least 1, which covers the vanilla PML). This definition is analogous to those in Acharya et al. [2017] and Charikar et al. [2019a,b].
- 6.2 So, the *profile-based estimator* must work properly on both distributions, the original and the APML. Triangle inequality then relates the property values of these distributions (by eliminating the estimator’s value) and yields a  $2\varepsilon$  estimation guarantee for the APML.
- 7.1 On the other hand, if the profile we picked has a probability at most  $\delta \cdot \exp(-k)$ , then the APML may fail, i.e., not produce a reasonable estimate.
- 7.2 However, there are at most (ignore logarithmic factors in the exponent)  $\exp(k)$  such profiles, hence by the union bound, the total probability of failing is at most  $\delta + 1/n$ .
- 8 Finally, we tune parameter  $r$ , which becomes something like  $k$ , up to logarithmic factors. Utilizing our entropy-dimension equivalence (Theorem 1) completes the proof.

**Median Trick** The following argument is standard method for boosting the confidence of learning algorithms, commonly known as the *median trick*.

**Lemma 7** (Median trick). *Let  $\alpha, \beta \in (0, 1)$  be real parameters satisfying  $1/10 \geq \alpha > \beta$ . For an accuracy  $\varepsilon > 0$  and a distribution set  $\mathcal{P} \subseteq \Delta$ , if there exists an estimator  $\hat{f}_A$  such that*

$$\Pr_{X^n \sim p} \left( \left| \hat{f}_A(X^n) - f(p) \right| > \varepsilon \right) < \alpha, \quad \forall p \in \mathcal{P},$$

*we can construct another estimator  $\hat{f}_B$  that takes a sample of size  $m := \left\lceil \frac{4n}{\log \frac{1}{2\alpha}} \log \frac{1}{\beta} \right\rceil$  and achieves*

$$\Pr_{Y^m \sim p} \left( \left| \hat{f}_B(Y^m) - f(p) \right| > \varepsilon \right) < \beta, \quad \forall p \in \mathcal{P}.$$

*Proof.* Given  $t \in \mathbb{N}$  i.i.d. copies of  $\hat{f}_A(X^n)$ , the probability that less than half of them satisfy the inequality in the parentheses is at least

$$\Pr \left( \sum_{i=1}^t \mathbb{1}_{A_i} < \frac{t}{2} \text{ for } A_i\text{'s satisfying } \Pr(A_i) < \alpha \right) \geq \Pr \left( \text{bin}(t, \alpha) < \frac{t}{2} \right).$$

By the law of total probability, the right-hand side equals to

$$\begin{aligned} 1 - \Pr \left( \text{bin}(t, \alpha) \geq \frac{t}{2} \right) &\geq 1 - \exp \left( \left( \left( \frac{1}{2\alpha} - 1 \right) - \frac{1}{2\alpha} \log \frac{1}{2\alpha} \right) \cdot \alpha t \right) \\ &\geq 1 - \exp \left( -\frac{t}{4} \log \frac{1}{2\alpha} \right), \end{aligned}$$

where the first step follows by the Chernoff bound of binomial random variables, and the second step follows by  $\alpha \leq 1/10$  and the inequality  $c - 1 - \frac{c}{2} \log c > 0, \forall c \geq 5$ .

Set  $t := \left\lceil \frac{4}{\log \frac{1}{2\alpha}} \log \frac{1}{\beta} \right\rceil$ , the right-hand side is at least  $1 - \beta$ .

Therefore, given a sample of size  $m = t \cdot n$ , we can partition it into  $t$  sub-samples of equal size, apply the estimator  $\hat{f}_A$  to each subsample, and define the median of the corresponding estimates as  $\hat{f}_B$ .

By the previous reasoning, this estimator satisfies

$$\Pr_{Y^m \sim p} \left( \left| \hat{f}_B(Y^m) - f(p) \right| > \varepsilon \right) < \beta, \forall p \in \mathcal{P}. \quad \square$$

*Proof of the theorem.* For any tolerance  $\delta \in (0, 1)$  and distribution  $p \in \Delta$ , define the  $(\delta, n)$ -typical cardinality of profiles with respect to  $p$  as the smallest cardinality  $C_{\delta, n}(p)$  of a set of length- $n$  profiles such that the probability of observing a sample from  $p$  with a profile in this set is at least  $1 - \delta$ . The following lemma provides a tight characterization of  $C_{\delta, n}(p)$  in terms of the dimension of  $\Phi^n \sim p$ .

**Lemma 8.** For any  $p \in \Delta$  and  $\Phi^n \sim p$ , with probability at least  $1 - 6/\sqrt{n}$ ,

$$C_{\frac{6}{\sqrt{n}}, n}(p) \leq n^{8(\mathcal{D}_n + 20 \log n)}.$$

The proof of the lemma follows by recursively applying Theorem 9. Specifically, let  $d := 2E_n(p) + 3 \log n$ , which is at least  $\mathcal{D}_n \sim p$ , with probability at least  $1 - 6/\sqrt{n}$ . Then,

$$C_{\frac{6}{\sqrt{n}}, n}(p) \leq \binom{n}{d} \binom{n+d-1}{d-1} \leq n^{2d-1} \leq n^{2(2E_n(p)+3 \log n)} \leq n^{8\mathcal{D}(\Phi^n)+20 \log n},$$

where the last inequality holds with with probability at least  $1 - 6/\sqrt{n}$ .

Now, let  $f$  be a symmetric property over  $\mathcal{P}$ . For simplicity, we will establish the theorem for the vanilla PML, since as our *proof outline* shows, the proof for any approximate PML (APML) is essentially the same. In addition, for a sequence  $x^n$  with profile  $\phi := \varphi(x^n)$ , we write  $\mathcal{P}_\phi$  for the PML estimate  $\mathcal{P}_\varphi(x^n)$ . According to Theorem 3, for any parameters  $\varepsilon > 0$  and  $\delta \in (0, 1)$ , if there exists an estimator  $\hat{f}$  such that

$$\Pr_{X^n \sim p} \left( \left| \hat{f}(X^n) - f(p) \right| > \varepsilon \right) < \delta, \forall p \in \mathcal{P},$$

there is an estimator  $\hat{f}_\varphi$  over profiles satisfying

$$\Pr_{X^n \sim p} \left( \left| \hat{f}_\varphi(\varphi(X^n)) - f(p) \right| > \varepsilon \right) < \delta, \forall p \in \mathcal{P}.$$

For an arbitrary length- $n$  profile  $\phi$  that satisfies  $\Pr_{\Phi^n \sim p}(\Phi^n = \phi) \geq 2\delta$ , these error bounds yield  $\Pr(|\hat{f}_\varphi(\phi) - f(p)| > \varepsilon) < \frac{1}{2}$ , and since  $\Pr_{\Phi^n \sim \mathcal{P}_\phi}(\Phi^n = \phi) \geq \Pr_{\Phi^n \sim p}(\Phi^n = \phi) \geq 2\delta$  by the definition of PML (as we take the distribution that maximizes the probability),

$$\Pr \left( \left| \hat{f}_\varphi(\phi) - f(\mathcal{P}_\phi) \right| > \varepsilon \right) < \frac{1}{2}.$$

By the union bound and triangle inequality,

$$\Pr(|f(p) - f(\mathcal{P}_\phi)| > 2\varepsilon) < 1 \iff |f(p) - f(\mathcal{P}_\phi)| \leq 2\varepsilon \text{ surely.}$$

Furthermore, by Lemma 8, with probability at least  $1 - 6/\sqrt{n}$ , the total probability of length- $n$  profiles  $\phi$  satisfying  $\Pr_{\Phi^n \sim p}(\Phi^n = \phi) < 2\delta$  is at most

$$2\delta \cdot C_{\frac{\varepsilon}{\sqrt{n}}, n}(p) + \frac{6}{\sqrt{n}} \leq 2\delta \cdot n^{8\mathcal{D}_n + 20 \log n} + \frac{6}{\sqrt{n}},$$

which basically upper bounds the probability that  $|f(p) - f(\mathcal{P}_{\Phi^n})| > 2\varepsilon$ . Next we will assume that there exists an estimator  $\hat{f}$  satisfying  $\Pr_{X^m \sim p}(|\hat{f}(X^m) - f(p)| > \varepsilon) < \delta, \forall p \in \mathcal{P}$ . By Lemma 7, if  $\delta \leq 1/10$ , we can construct another estimator  $\hat{f}'$  that takes a sample of size  $n = \frac{4m}{\log \frac{1}{2\delta}} \log \frac{1}{\delta'}$  ( $n$  is assumed to be an integer here) and achieves a higher-confidence guarantee

$$\Pr_{X^n \sim p}(|\hat{f}'(X^n) - f(p)| > \varepsilon) < \delta', \forall p \in \mathcal{P}.$$

Then by the above reasoning, with probability at least  $1 - 6/\sqrt{n}$ ,

$$\begin{aligned} \Pr_{\Phi^n \sim p}(|f(p) - f(\mathcal{P}_{\Phi^n})| > 2\varepsilon) &\leq 2\delta' \cdot n^{8\mathcal{D}_n + 20 \log n} + \frac{6}{\sqrt{n}} \\ &= 2 \exp\left(-\frac{n}{4m} \log \frac{1}{2\delta} + (8\mathcal{D}_n + 20 \log n) \log n\right) + \frac{6}{\sqrt{n}}. \end{aligned}$$

For the first term on the right hand side to vanish as quickly as  $1/\sqrt{n}$ , it suffices to have

$$\frac{n}{4m} \log \frac{1}{2\delta} \geq 20 \cdot \mathcal{D}_n \log n \text{ and } \frac{n}{4m} \log \frac{1}{2\delta} \geq 40 \cdot \log^2 n.$$

Simplifying the expressions and applying the union bound yield that  $|f(p) - f(\mathcal{P}_{\Phi^n})| \leq 2\varepsilon$  with probability at least  $1 - 1/\sqrt{n}$ , given both

$$\frac{n}{\mathcal{D}_n} \gtrsim \frac{m}{\log \frac{1}{\delta}} \text{ and } n \geq 8m. \quad \square$$

## B.5 Experiments

Prior works such as Hao and Orlytsky [2019a], Pavlichin et al. [2019] have experimentally demonstrated the efficiency of PML on estimating several classical properties, including the Shannon and Rényi entropy, support size, and  $\ell_1$  distance to the uniform distribution. Our result further extends and establishes the efficiency of PML for numerous symmetric properties that are under-explored. Given the broadness of this property class, the potential applications are countless.

Consider a variant of Shannon entropy,  $f(p) := \sum_x p_x \log^2 p_x$ , that mildly puts more emphasis on small probabilities. As the property is relatively new and non-Lipschitz, prior works and approaches do not easily yield a satisfiable learning guarantee. Our result hence comes into play, because  $f$  is symmetric, which suffices for Theorem 4 to take effect. Below, we will estimate this property by an  $n$ -sample PML plug-in, and compare its performance to two estimators: the  $n$ -sample empirical estimator that evaluates the entropy of the empirical distribution, serving as a baseline, and the  $10n$ -sample empirical estimator whose sample size is larger than others by *an order of magnitude*.

We considered six natural distributions: uniform, Zipf(1/2), Zipf(2), Dirichlet(1)-drawn-, Dirichlet(2)-drawn-, and geometric, all having support size  $k = 5,000$ . The plots are presented in Figure 1, with both vertical and horizontal axes showing in *log-scale* (base 10). The sample size  $n$  ranges from  $10^3$  to  $10^5$ , and every data point represents the average absolute error over 20 independent simulations.

Specifically, the geometric distribution has a success probability of  $(k-1)/k$ ; the Zipf(1/2) and Zipf(2) distributions have probability  $p_i \propto i^{-1/2}$  and  $p_i \propto i^{-2}$  for  $i \geq 1$ , both being truncated at  $k$  and re-normalized; drawing a distribution from the Dirichlet(1) prior is equivalent to drawing one uniformly from the  $k$ -dimensional standard simplex.



As the experiments demonstrate, the PML plug-in estimator significantly improves over the empirical estimator (note that the axes are in log-scale) and is as good as an estimator having access to samples larger by order of magnitudes. There are multiple PML implementations and we have used the one by Hao and Orłitsky [2019a] (Section 4 of that paper presents a list of PML computation algorithms). Code is included in the supplementary material. For instructions on how to use the code, please refer to the inline comments and Section 4.1 in the supplementary material of Hao and Orłitsky [2019a].

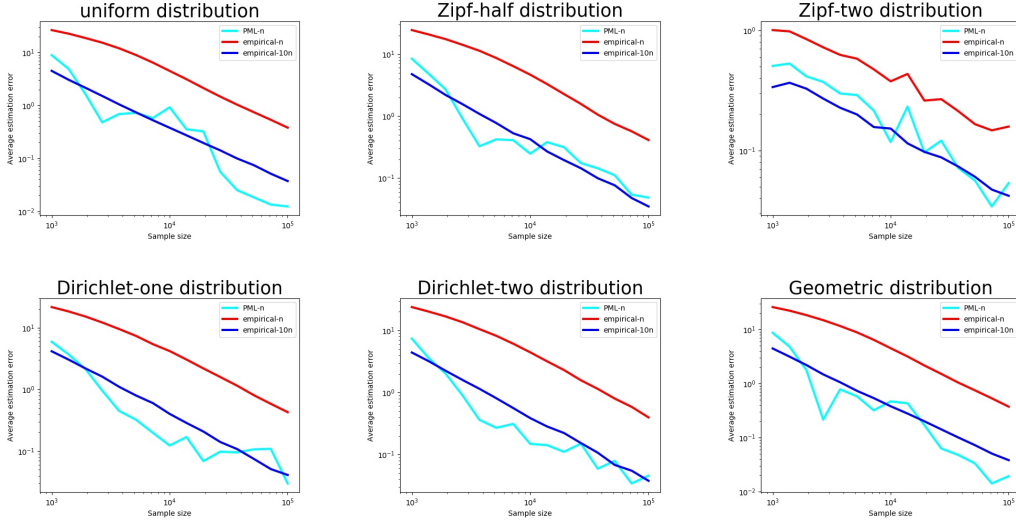

Figure 1: Inferring property  $f$  via the PML plug-in. For clarity, both the horizontal axis (sample size) and the vertical axis (average absolute error) are in the log-10 scale.

## C Competitive Estimation of Distributions and Their Entropy

### C.1 Theorem 2: Competitive Distribution Estimation

Estimating distributions from their samples is a statistical-inference cornerstone, and has numerous applications, ranging from biological studies [Armañanzas et al., 2008] to language modeling [Chen and Goodman, 1999]. A learning algorithm  $\hat{p}$  in this setting is called a *distribution estimator*, which associates with every sequence  $x^n$  a distribution  $\hat{p}(x^n) \in \Delta$ . Given a sample  $X^n \sim p$ , we measure the performance of  $\hat{p}$  in estimating distribution  $p$  by the Kullback-Leibler (KL) divergence  $D(p \parallel \hat{p}(X^n))$ .

Let  $r_n(p, \hat{p}) := \min\{r : \Pr(D(p \parallel \hat{p}(X^n)) \leq r) \geq 9/10\}$  be the *minimal KL error*  $\hat{p}$  could achieve with probability at least 9/10. Then, the *worst-case error* of estimator  $\hat{p}$  over  $P \subseteq \Delta$  is  $r_n(P, \hat{p}) := \max_{p \in P} r_n(p, \hat{p})$ , and the lowest worst-case error for  $P$ , achieved by the optimal estimator, is the *minimax error*  $r_n(P) := \min_{\hat{p}'} r_n(P, \hat{p}')$ . The most widely studied distribution set  $P$  is simply  $\Delta_{\mathcal{X}}$ . With  $\mathcal{X}$  being finite, it has become a classical result that  $r_n(\Delta_{\mathcal{X}}) = \Theta(|\mathcal{X}|/n)$ , which is achievable, up to constant factors, by an add-constant estimator [Braess and Sauer, 2004, Kamath et al., 2015].

**Beyond minimax** Despite being minimax optimal, the  $|\mathcal{X}|/n$ -result and the algorithm, are not satisfiable from a practical point of view. The reason is that the formulation puts much of its emphasis on the worst-case performance, and ignores the intrinsic simplicity of  $p$  in a pessimistic fashion. Hence, the desire to design more efficient estimators for practical distributions, like power-law, or Poisson, has led to algorithms that possess adaptive estimation guarantees.

Concretely, the minimax formulation has two modifiable components – the collection  $P$  and the error function  $D$ . A common approach to specifying  $P$  is adding structural assumptions, such as monotonicity,  $m$ -modality, and log-concavity, which, in many cases, makes algorithm refinement possible by leveraging structural simplicity. An orthogonal approach to encouraging adaptability without imposing structures is to replace absolute error by relative error, which we illustrate below.

**Competitive estimation** Without strong prior knowledge on the underlying distribution, a reasonable estimator should *naturally* assign the same probability to symbols appearing an equal number of times. *Competitive estimation* calls for finding a universally near-optimal estimator that learns *every* distribution as well as the best natural estimator that knows the true distribution.

Denote by  $\mathcal{N}$  the collection of all natural estimators. For any distribution  $p \in \Delta$  and sample  $X^n \sim p$ , a given estimator  $\hat{p}$  incurs, with respect to the best natural estimator knowing  $p$ , an instance-by-instance *relative KL error* of

$$D_{\text{nat}}(p \parallel \hat{p}(X^n)) := D(p \parallel \hat{p}(X^n)) - \min_{\hat{q} \in \mathcal{N}} D(p \parallel \hat{q}(X^n)).$$

Analogous to the minimax formulation, we denote by  $r_n^{\text{nat}}(p, \hat{p}) := \min\{r : \Pr(D_{\text{nat}}(p \parallel \hat{p}(X^n)) \leq r) \geq 9/10\}$  the *minimal relative error*  $\hat{p}$  achieves with probability at least 9/10, by  $r_n^{\text{nat}}(P, \hat{p})$  the *worst-case relative error* of  $\hat{p}$  over  $P \subseteq \Delta$ , and by  $r_n^{\text{nat}}(P)$  the *minimax relative error*.

**Old and new results** Initiating the competitive formulation, [Orlitsky and Suresh \[2015\]](#) show that a simple variant of the well-known Good-Turing estimator achieves  $r_n^{\text{nat}}(\Delta) \lesssim 1/n^{1/3}$ , and a more involved estimator in [Acharya et al. \[2013\]](#) attains the optimal  $r_n^{\text{nat}}(\Delta) \simeq 1/\sqrt{n}$ . For a fully adaptive guarantee, [Hao and Orlitsky \[2019b\]](#) further refine the bound and design an estimator  $\hat{p}^*$  achieving  $r_n^{\text{nat}}(p, \hat{p}^*) \lesssim \mathbb{E}_{\mathcal{D}_n \sim p}[\mathcal{D}_n/n] \lesssim r_n^{\text{nat}}(\Delta)$ , for every  $p \in \Delta$ , but provide no lower bounds.

In this work, we completely characterize  $r_n^{\text{nat}}(p, \cdot)$  with essentially matching lower and upper bounds. Surprisingly, we show that for nearly every sample size  $n$ , the quantity behaves like  $\mathcal{H}_n(p)/n$ .

**Theorem 2** (Optimal competitive error). *There is a near-linear-time computable estimator  $\hat{p}^*$ , such that for any distribution  $p$  and  $n$ ,*

$$r_n^{\text{nat}}(p, \hat{p}^*) \lesssim \frac{\mathcal{H}_n(p)}{n}.$$

where  $\hat{p}^*$  is the near linear-time computable estimator in [Hao and Orlitsky \[2019b\]](#) mentioned above. On the other hand, for any  $H \in [0, \sqrt{n})$ ,

$$\min_{\hat{p}} \max_{p: \mathcal{H}_n(p) \lesssim H} r_n^{\text{nat}}(p, \hat{p}) \gtrsim \frac{H}{n}.$$

## C.2 Proof of Theorem 2

*Proof.* The upper bound follows by the main result of [Hao and Orlitsky \[2019b\]](#) and [Theorem 1](#) asserting the entropy-dimension equivalence. To establish the lower bound, denote  $s := (H/\log n)^{1/2}$ ,  $I := \{s, s+1, \dots, 2s\}$ , and  $P := \cup_{i \in I} P_i := \cup_{i \in I} U_i/n$  where

$$U := \bigcup_{i \in I} U_i := \bigcup_{i \in I} \{i^2 \log^2 n, i^2 \log^2 n + 1, \dots, i^2 \log^2 n + i \log n\},$$

where  $H \lesssim \sqrt{n/\log n}$  for the total to be at most  $n$ . Let  $A \cdot \{B\}$  denote the length- $A$  constant sequence of value  $B$ . Let  $C$  be the set of distributions in the form of

$$p := L \cdot \left\{ \frac{1}{n^2} \right\} \bigcup \left( \bigcup_i (i \log n) \cdot \{q_i \text{ or } q'_i : nq_i = i^2 \log^2 n, nq'_i = i^2 \log^2 n + i \log n\} \right).$$

where the probability values are sorted according to the ordering they appear above,  $L$  is a proper variable that makes the probabilities sum to 1, and the range of support of distribution  $p$  is irrelevant for our purpose and hence unspecified. Equip a uniform prior over  $C$  (equivalently, construct a random distribution). We have several claims in order:

- For any  $i \in I$  and  $\mu \in U_i$ , by the construction and independence,

$$\begin{aligned} \Pr(\varphi_\mu = 1 | q_i \text{ is chosen}) &\approx (i \log n) \cdot \left( \Pr(\text{Poi}(nq_i) = \mu) \cdot (\Pr(\text{Poi}(nq_i) \neq \mu))^{i \log n - 1} \right) \\ &\approx (i \log n) \cdot \left( \frac{1}{\sqrt{nq_i}} \cdot \left( 1 - \frac{1}{\sqrt{nq_i}} \right)^{i \log n - 1} \right) \\ &\geq \Omega(1). \end{aligned}$$

Similarly, we have  $\Pr(\varphi_\mu = 1 | q'_i \text{ is chosen}) \geq \Omega(1)$ . Hence,

$$\Pr(\varphi_\mu = 1) \geq \Omega(1).$$



- For any  $i \in I$  and  $\mu \in U_i$ , by Bayes' rule,

$$\Pr(q_i \text{ is chosen} | \varphi_\mu = 1) = \frac{\Pr(\varphi_\mu = 1 | q_i \text{ is chosen}) \cdot 0.5}{\Pr(\varphi_\mu = 1)} \geq \Omega(1).$$

Similarly, we have  $\Pr(q'_i \text{ is chosen} | \varphi_\mu = 1) \geq \Omega(1)$ .

- For any  $i \in I$  and  $\mu \in U_i$ , the value of  $M_\mu$ , the total probability of symbols appearing  $\mu$  times, is  $q_i$  if  $\varphi_\mu = 1$  and  $q_i$  is chosen; and is  $q'_i$  if  $\varphi_\mu = 1$  and  $q'_i$  is chosen. Any estimator  $E_\mu$  will incur an expected absolute error of  $\Omega(i(\log n)/n)$  in estimating  $M_\mu$  given  $\varphi_\mu = 1$ .
- Note that for any  $\alpha \in [0, 1]$  and  $x, y > 0$ ,

$$\alpha(y - z)^2 + (1 - \alpha)(z - x)^2 \geq \alpha(1 - \alpha)(x - y)^2.$$

- Therefore, the expected squared Hellinger distance  $\mathbb{H}^2(\cdot, \cdot)$  of any estimator  $E_\mu$  in estimating  $(M_\mu)_{\mu \geq 0}$  satisfies, by the linearity of expectation,

$$\begin{aligned} \frac{1}{2} \sum_{\mu \geq 0} \mathbb{E} \left( \sqrt{E_\mu} - \sqrt{M_\mu} \right)^2 &\geq \frac{1}{2} \sum_{i \in I} \sum_{\mu \in U_i} \mathbb{E} \left[ \left( \sqrt{E_\mu} - \sqrt{M_\mu} \right)^2 | \varphi_\mu = 1 \right] \Pr(\varphi_\mu = 1) \\ &= \frac{1}{2} \sum_{i \in I} \sum_{\mu \in U_i} \mathbb{E} \left[ \left( \frac{E_\mu - M_\mu}{\sqrt{E_\mu} + \sqrt{M_\mu}} \right)^2 | \varphi_\mu = 1 \right] \Pr(\varphi_\mu = 1) \\ &\geq \sum_{i \in I} (i \log n) \cdot \Omega \left( \frac{(i \log n)/n}{\sqrt{i^2 (\log^2 n)/n}} \right)^2 \\ &\geq s \cdot \Omega \left( \frac{s \log n}{n} \right) \\ &= \Omega \left( \frac{H}{n} \right). \end{aligned}$$

- Consequently, by the inequality  $D(P \| Q) \geq 2\mathbb{H}^2(P, Q)$ ,

$$\mathbb{E} [D(E \| M)] \geq \mathbb{E} [2\mathbb{H}^2(E, M)] \geq \Omega \left( \frac{H}{n} \right).$$

- Finally, combining Theorem 1, 9 and 11 yields that, with high probability,

$$\mathcal{H}_n(p) \simeq \mathcal{D}_n \simeq E_n(p) \simeq \mathcal{H}_n^S(p) = \sum_{j \geq 1} \min \{ p_{I_j}, j \cdot \log n \},$$

which, by our definition, is at most  $\mathcal{O}(\log n + s(s \log n)) = \mathcal{O}(\log n + H)$ .  $\square$

### C.3 Extension: Competitive Entropy Estimation

Recall that a distribution estimator is *natural* if it assigns the same probability to symbols of equal multiplicity, and a property estimator is *plug-in* if it first finds an estimate of the distribution and then evaluates the property at this estimate. As an off-the-shelf method, the plug-in approach is widely used in estimating distribution properties.

As we mentioned in Appendix B.3, to estimate a symmetric property, an accurate estimate of the probability multiset of the underlying distribution suffices. Intuitively, it should be easier in terms of statistical efficiency to recover just the probability multiset than to learn the entire distribution. For example, over distribution collection  $\Delta_{\mathcal{X}}$ , the PML plug-in estimator is minimax optimal for learning entropy, while the empirical distribution, being minimax optimal for distribution estimation, is suboptimal as a plug-in entropy estimator.

However, the analysis and computation (though efficient) of such multiset-based estimation methods are often involved [Valiant and Valiant, 2011, 2013, 2016, Han et al., 2018, Charikar et al., 2019b,

Acharya et al., 2017, Hao and Orlicsky, 2019a]. For this reason, plug-in estimators that first estimate the true distribution are still popular in practice, and often, the distribution component is natural.

For example, several notable and widely used entropy estimators are *natural plug-in*, including the empirical estimator that simply uses the empirical distribution, James-Stein shrinkage [Hausser and Strimmer, 2009] that shrinks the distribution estimate towards uniform, and Dirichlet-smoothed [Schürmann and Grassberger, 1996] that imposes a Dirichlet prior over  $\Delta_{\mathcal{X}}$ .

The logic behind these estimators is simple – if two distributions (e.g., the true distribution and our estimate) are close, the same is expected for their entropy values. The next theorem shows that for *every* distribution and among all plug-in entropy estimators, the distribution estimator in Hao and Orlicsky [2019b] is as good as the one that performs best in estimating the actual distribution.

Denote by  $\mathcal{N}$  the collection of all natural estimators, and write  $|H(p) - H(q)|$  as  $\ell_H(p, q)$ .

**Theorem 13** (Competitive entropy estimation). *For any distribution  $p$ , sample  $X^n \sim p$ , and the respective best natural estimator  $\hat{p}_{X^n}^* := \arg \min_{\hat{p} \in \mathcal{N}} D(p \parallel \hat{p}_{X^n})$ , with probability at least  $1 - 1/n$ ,*

$$\ell_H(p, \hat{p}_{X^n}^*) - \ell_H(p, \hat{p}_{X^n}^N) \leq \tilde{O} \left( \sqrt{\frac{\mathcal{H}_n(p)}{n}} \right).$$

*Proof.* Given any natural estimator and a sample  $X^n \sim p$ , we denote by  $q$  the distribution estimate. The entropy of  $q$  differs from the true entropy by

$$\begin{aligned} H(q) - H(p) &= - \sum_x q_x \log q_x + \sum_x p_x \log p_x \\ &= \sum_x p_x \log p_x - \sum_x p_x \log q_x + \sum_x p_x \log q_x - \sum_x q_x \log q_x \\ &= \sum_x p_x \log \frac{p_x}{q_x} + \sum_x (p_x - q_x) \log q_x \\ &= D(p \parallel q) + \sum_x (p_x - q_x) \log q_x. \end{aligned}$$

Denote by  $P_\mu(X^n)$  and  $Q_\mu(X^n)$  the total probability that distributions  $p$  and  $q$  assign to symbols with multiplicity  $\mu$ . Since  $q$  is induced by a natural estimator, we also write  $q_\mu(X^n)$  for the probability that  $q$  assigns to *each* symbol with multiplicity  $\mu$  in  $X^n$ . Recall that prevalence  $\varphi_\mu(X^n)$  denotes the number of symbols with multiplicity  $\mu$  in  $X^n$ . Therefore,  $Q_\mu(X^n) = \varphi_\mu(X^n) \cdot q_\mu(X^n)$ .

Henceforth, whenever it is clear from the context, we suppress  $X^n$  in related expressions. Then, the second term on the right-hand side satisfies

$$\begin{aligned} \sum_x (p_x - q_x) \log q_x &= \sum_x \left( \sum_\mu \mathbb{1}_{\mu_x=\mu} \cdot p_x - \sum_\mu \mathbb{1}_{\mu_x=\mu} \cdot q_\mu \right) \log \left( \sum_\mu \mathbb{1}_{N_x=\mu} \cdot q_\mu \right) \\ &= \sum_x \sum_\mu \mathbb{1}_{\mu_x=\mu} \cdot (p_x - q_\mu) \log q_\mu \\ &= \sum_\mu \left( \sum_x \mathbb{1}_{\mu_x=\mu} \cdot p_x - \sum_x \mathbb{1}_{\mu_x=\mu} \cdot q_\mu \right) \log q_\mu \\ &= \sum_\mu (P_\mu - Q_\mu) \log q_\mu. \end{aligned}$$

Let  $q_{\min}$  be the smallest nonzero probability of  $q$ . By the triangle inequality and Pinsker's inequality,

$$\begin{aligned} \left| \sum_\mu (P_\mu - Q_\mu) \log q_\mu \right| &\leq \sum_\mu |(P_\mu - Q_\mu) \log q_\mu| \\ &\leq |\log q_{\min}| \sum_\mu |P_\mu - Q_\mu| \\ &\leq |\log q_{\min}| \sqrt{2D(P \parallel Q)}. \end{aligned}$$

For simplicity, suppress the subscript  $X^n$  from all estimators, e.g., write  $\hat{p}^\mathcal{N} := \hat{p}_{X^n}^\mathcal{N}$ . Now we show that if a symbol  $x$  has multiplicity  $\mu$ , the estimator  $\hat{p}^\mathcal{N}$  will assign a probability mass of  $P_\mu/\varphi_\mu$ . In other words,  $\hat{P}_\mu^\mathcal{N} = P_\mu$  since  $p^\mathcal{N} \in \mathcal{N}$ . Indeed, the corresponding KL-divergence values differ by

$$\begin{aligned} \sum_x p_x \log \frac{p_x}{q_x} - \sum_x \sum_\mu \mathbb{1}_{\mu_x=\mu} \cdot p_x \log \frac{p_x}{P_\mu/\varphi_\mu} &= \sum_x p_x \log \frac{1}{q_x} - \sum_x \sum_\mu \mathbb{1}_{\mu_x=\mu} \cdot p_x \log \frac{\varphi_\mu}{P_\mu} \\ &= \sum_x \sum_\mu \mathbb{1}_{\mu_x=\mu} \cdot p_x \log \frac{P_\mu}{\varphi_\mu q_\mu} \\ &= \sum_\mu P_\mu \log \frac{P_\mu}{Q_\mu} = D(P\|Q) \geq 0. \end{aligned}$$

Then, the above equalities yield that,

$$H(\hat{p}^\mathcal{N}) - H(p) = D(p\|\hat{p}^\mathcal{N}) + \sum_\mu (P_\mu - \hat{P}_\mu^\mathcal{N}) \log p_\mu^\mathcal{N} = D(p\|\hat{p}^\mathcal{N}).$$

Next consider the other estimator  $\hat{p}^*$ , which is also natural. Let  $\mathcal{D}_n = \mathcal{D}_n$  be the profile dimension of  $X^n$ . By the results in [Hao and Orlitsky \[2019b\]](#), estimator  $\hat{p}^*$  achieves a  $\mathcal{D}_n/n$  excess loss, i.e.,

$$D(p\|\hat{p}_{X^n}^*) - \min_{\hat{p} \in \mathcal{N}} D(p\|\hat{p}_{X^n}) = D(P\|\hat{P}^*) \leq \tilde{\mathcal{O}}\left(\frac{\mathcal{D}_n}{n}\right),$$

for every  $p$  and  $X^n \sim p$ , with probability at least  $1 - \mathcal{O}(1/n)$ . In addition, by its construction, the minimum probability of  $\hat{p}_{X^n}^*$  is at least  $1/n^4$ . Therefore, with probability at least  $1 - \mathcal{O}(1/n)$ ,

$$\left| \sum_x (p_x - \hat{p}_x^*) \log \hat{p}_x^* \right| = \left| \sum_\mu (P_\mu - \hat{P}_\mu^*) \log \hat{p}_\mu^* \right| \leq |\log \hat{p}_{\min}^*| \cdot \sqrt{2D(P\|\hat{P}^*)} \leq \tilde{\mathcal{O}}\left(\sqrt{\frac{\mathcal{D}_n}{n}}\right).$$

Finally, the triangle inequality combines the above results and yields

$$\begin{aligned} \ell_H(p, \hat{p}^*) - \ell_H(p, \hat{p}^\mathcal{N}) &= |H(p) - H(\hat{p}^*)| - |H(p) - H(\hat{p}^\mathcal{N})| \\ &= \left| D(p\|\hat{p}^*) + \sum_x (p_x - \hat{p}_x^*) \log \hat{p}_x^* \right| - \left| \min_{\hat{p} \in \mathcal{N}} D(p\|\hat{p}) \right| \\ &\leq \left| D(p\|\hat{p}^*) - \min_{\hat{p} \in \mathcal{N}} D(p\|\hat{p}) \right| + \left| \sum_x (p_x - \hat{p}_x^*) \log \hat{p}_x^* \right| \\ &= D(P\|\hat{P}^*) + \tilde{\mathcal{O}}\left(\sqrt{\frac{\mathcal{D}_n}{n}}\right) \\ &\leq \tilde{\mathcal{O}}\left(\sqrt{\frac{\mathcal{D}_n}{n}}\right). \end{aligned}$$

This together with [Theorem 1](#) completes the proof.  $\square$

## C.4 Experiments

The experiments in [Hao and Orlitsky \[2019b\]](#) have demonstrated the efficiency of  $\hat{p}^*$ , showing that the estimator frequently and uniformly outperforms an improved version of the well-known Good-Turing estimation scheme [\[Orlitsky and Suresh, 2015\]](#), for numerous distributions and parameter settings. Our results confirmed the optimality of estimator  $p^*$  from a theoretical point of view, and moves forward considerably our understanding of how well one can approach the performance of a genie having the full knowledge of the true distribution, but restricted to be natural as all human beings.

In the following, we do not repeat the experiments in [Orlitsky and Suresh \[2015\]](#) (see [Section 2](#) of its supplementary), and instead, investigate a novel and highly related task – employing  $\hat{p}^*$  as a plug-in estimator for Shannon entropy. By [Theorem 13](#) and its proof, we already see that the resulting plug-in estimator  $H \circ \hat{p}^*$  is as good as any plug-in estimator with a natural distribution component, and how

well it performs, to a certain extent, depends on how well it approximates the true distribution under the KL divergence. But is this plug-in estimator still competitive when compared to estimators having observed samples of much larger sizes, or to the state-of-the-art estimators that are designed just for entropy estimation? The following experiments answered this question in the affirmative.

Below we demonstrate the efficiency of  $\hat{p}^*$  when used as a plug-in entropy estimator. We will compare its performance with a size- $n$  sample to three estimators: the  $n$ -sample *empirical* estimator that evaluates the entropy of the empirical distribution, the  $n \log n$ -sample empirical estimator that has access to much more information, and a state-of-the-art entropy estimator in Wu and Yang [2016] based on minimax polynomial approximations (which we refer to as WY). Shown by the experiments in Wu and Yang [2016], under numerous settings, the WY estimator frequently outperformed several classical estimators and other minimax estimators such as Valiant and Valiant [2011, 2013], Jiao et al. [2015]. Hence, we maintain simplicity and do not compare our approach to the latter ones.

We considered six natural distributions: uniform, two-steps-, Zipf(1/2), binomial, geometric, and Dirichlet(1)-drawn-, all having support size  $k = 5,000$ . The plots are presented in Figure 2, with both vertical and horizontal axes showing in *log-scale* (base 10). The sample size  $n$  ranges from  $10^3$  to  $10^5$ , and every data point represents the average absolute error over 20 independent simulations. We refer to the plug-in estimator using  $\hat{p}^*$  as *HO*.

Specifically, 10% probability values of the two-steps distribution  $\propto 9/k$ , and the rest  $\propto 1/k$ ; the binomial and geometric distributions have success probabilities of  $10/k$  and  $(k - 1)/k$ , respectively; the Zipf(1/2) distribution has probability  $p_i \propto i^{-1/2}$  for  $i \geq 1$ , and is truncated at  $k$  and re-normalized.

We see that the performance of the WY estimator and our plug-in approach are essentially the same. In particular, for Dirichlet(1)-drawn-, WY is better, but for binomial, WY is worse; for all other cases, the two error curves basically follow the same trend and lie in the same region. This is somewhat surprising since intuitively,  $\hat{p}^*$  is a distribution estimator and its design has no consideration about entropy estimation, while WY is geared towards this task. On the other hand, the performance of the induced plug-in estimator should be both efficient and competitive, as guaranteed by Theorem 13.

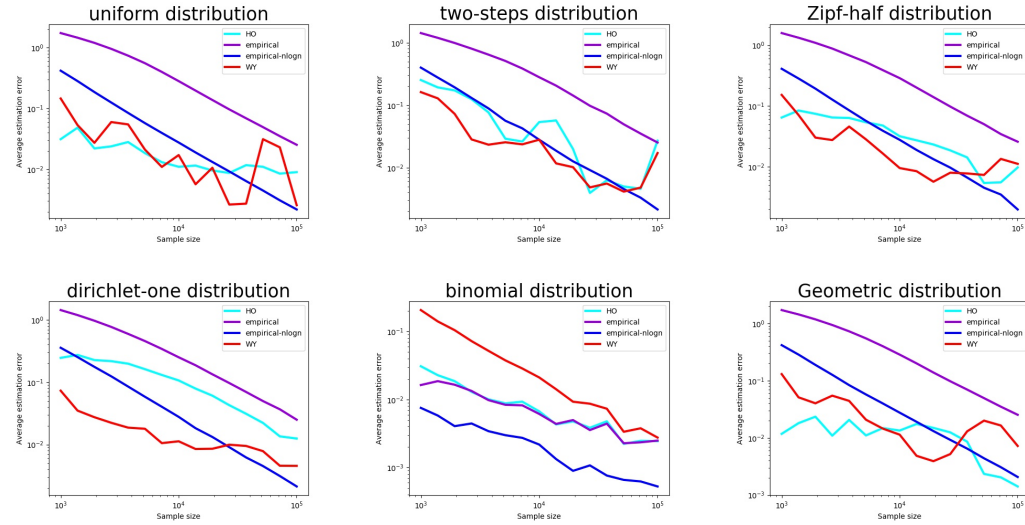

Figure 2: Competitive entropy estimation. For clarity, both the horizontal axis (sample size) and the vertical axis (average absolute error) are in the log-10 scale.

## D Optimal Characterization for Structured Families

Following the previous discussions, we will derive nearly tight bounds on  $\mathcal{H}_n(p)$  for three important structured families – log-concave, power-law, and histogram. These bounds clearly demonstrate the power of profile entropy in characterizing natural shape constraints.

For the subsections below, we adopt the convention of specifying structured distributions over  $\mathcal{X} = \mathbb{Z}$ .

### D.1 Theorem 6: Log-Concave Family

The log-concave family encompasses a broad range of discrete distributions, such as Poisson, hyper-Poisson, Poisson binomial, binomial, negative binomial, and geometric, and hyper-geometric, with broad applications to statistics [Saumard and Wellner, 2014], computer science [Lovász and Vempala, 2007], economics [An, 1997], and geometry [Stanley, 1989].

Formally, a distribution  $p \in \Delta_{\mathbb{Z}}$  is *log-concave* if  $p$  has a contiguous support and  $p_x^2 \geq p_{x-1} \cdot p_{x+1}$  for all  $x \in \mathbb{Z}$ . The next result bounds the profile entropy of this family, and is *tight* up to logarithmic factors. For simplicity, henceforth we write  $a \wedge b$  for  $\min\{a, b\}$  (and  $\vee$  for max), and slightly abuse the notation and write  $a \simeq b$  for  $a+1 = \tilde{\Theta}(b+1)$ , which does not change the nature of the results.

**Theorem 6.** *Let  $\mathcal{L}_\sigma \subseteq \Delta_{\mathbb{Z}}$  denote the collection of log-concave distributions with variance  $\sigma^2$ . Then,*

$$\max_{p \in \mathcal{L}_\sigma} \mathcal{H}_n(p) \simeq \sigma \wedge \frac{n}{\sigma}.$$

*In particular, if we discretize a Gaussian variable  $X \sim \mathcal{N}(\mu, \sigma^2)$  by rounding it to the nearest integer, the distribution of the resulting variable achieves the maximum, up to logarithmic factors. Moreover, such a discretization procedure preserves log-concavity for any continuous distribution over  $\mathbb{R}$ .*

A similar bound holds for  $t$ -mixtures of log-concave distributions. More concretely,

**Theorem 14.** *For any  $t$ -mixture  $p \in \Delta_{\mathbb{Z}}$  of log-concave distributions with variances  $\sigma_i^2, 1 \leq i \leq t$ ,*

$$\mathcal{H}_n(p) \lesssim \left( \sum_i \sigma_i \right) \wedge \max_i \left\{ \frac{n}{\sigma_i} \right\},$$

*where the right-hand side is assumed to be at least  $t$  since otherwise  $\mathcal{H}_n(p) \lesssim t$ , and in practice,  $t$  is often a small quantity, e.g. a constant.*

### D.2 Proof of Theorem 6 and 14

We start by showing the  $\mathcal{H}_n(p) \gtrsim \sigma \wedge n/\sigma$  lower bound. A requirement is that  $p$  must be a discrete log-concave distribution. We show that one can take  $p$  as a discretized Gaussian  $\mathcal{N}(\mu, \sigma^2)$ . In addition, the discretization procedure works for any continuous distribution and preserves log-concavity and essentially also the variance. We will start by introducing the discretization procedure.

*Proof.* Log-concavity is a generic structure exhibited by numerous classical distributions, both those discrete (introduced above) and continuous ones, such as Gaussian, exponential, uniform, logistic, and Laplace distributions. Below, we present a discretization procedure that preserves distribution shapes such as monotonicity, modality, and log-concavity. Applying this procedure to a Gaussian distribution  $\mathcal{N}(\mu, \sigma^2)$  yields the lower bound in Theorem 6.

Let  $X$  be a continuous random variable with density function  $f(x)$ . For any  $x \in \mathbb{R}$ , denote by  $\lceil x \rceil$  the closest integer  $z$  such that  $x \in (z - 1/2, z + 1/2]$ . The distribution of  $\lceil X \rceil$  is over  $\mathbb{Z}$  and satisfies

$$p(z) := \int_{z-\frac{1}{2}}^{z+\frac{1}{2}} f(x) dx, \quad \forall z \in \mathbb{Z}.$$

We refer to the random variable  $\lceil X \rceil$  as the discretized version of  $X$ .

**Shape Preservation** By the definition of  $\lceil x \rceil$ , one can readily verify that the above procedure preserves several important shape characteristics of distributions, such as monotonicity, modality, and  $k$ -modality (possibly yields a smaller  $k$ ). The following theorem further covers log-concavity.

**Lemma 9.** For any continuous random variable  $X$  over  $\mathbb{R}$  with a log-concave density  $f$ , the distribution  $p \in \Delta_{\mathbb{Z}}$  associated with  $\lceil X \rceil$  is also log-concave.

To show this, we need the following basic lemma about concave functions.

**Lemma 10.** If  $f$  is a real concave distribution, for any real numbers  $x_1, x_2, y_1$ , and  $y_2$  satisfying  $x_1 \leq x_2, y_1 \leq y_2, x_1 < y_1$ , and  $x_2 < y_2$ ,

$$\frac{f(y_1) - f(x_1)}{y_1 - x_1} \geq \frac{f(y_2) - f(x_2)}{y_2 - x_2}.$$

By the above lemma, for any  $x, y \in \mathbb{R}$  such that  $|x - y| \leq 1$ , and any function  $f$  that is log-concave,

$$\log f(x+1) - \log f(x) \leq \log f(y) - \log f(y-1) \iff f(x+1)f(y-1) \leq f(x)f(y).$$

*Proof of Lemma 9.* By definition, distribution  $p$  is log-concave if  $p$  has a consecutive support and  $p(z)^2 \geq p(z+1)p(z-1), \forall z$ . The first condition holds for  $\lceil X \rceil$  since  $X$  has a continuous support on  $\mathbb{R}$ , and  $p(z)$  is positive as long as  $f(x) > 0$  for a non-empty sub-interval of  $(z - 1/2, z + 1/2]$ .

Below we show that  $p$  also satisfies the second condition. Specifically, for any  $z \in \mathbb{Z}$ ,

$$\begin{aligned} p(z-1)p(z+1) &= \left( \int_{z-\frac{3}{2}}^{z-\frac{1}{2}} f(x)dx \right) \left( \int_{z+\frac{1}{2}}^{z+\frac{3}{2}} f(x)dx \right) \\ &= \left( \int_{z-\frac{1}{2}}^{z+\frac{1}{2}} f(x-1)dx \right) \left( \int_{z-\frac{1}{2}}^{z+\frac{1}{2}} f(x+1)dx \right) \\ &= \int_{z-\frac{1}{2}}^{z+\frac{1}{2}} \int_{z-\frac{1}{2}}^{z+\frac{1}{2}} f(x-1)f(y+1)dxdy \\ &\leq \int_{z-\frac{1}{2}}^{z+\frac{1}{2}} \int_{z-\frac{1}{2}}^{z+\frac{1}{2}} f(x)f(y)dxdy \\ &= \left( \int_{z-\frac{1}{2}}^{z+\frac{1}{2}} f(x)dx \right)^2 \\ &= p(z)^2, \end{aligned}$$

where the inequality follows by Lemma 10 and its implication.  $\square$

**Moment preservation** Denote by  $p$  the distribution of  $\lceil X \rceil$  for  $X \sim f$ . Let  $\mu$  and  $\sigma^2$  be the mean and variance of density  $f$ , given that they exist. The theorem below shows that distribution  $p$  has, within small additive absolute constants, a mean of  $\mu$  and variance of  $\Theta(\sigma^2)$ .

**Lemma 11.** Under the aforementioned conditions, the mean of  $\lceil X \rceil$  satisfies

$$\mathbb{E} \lceil X \rceil = \mu \pm \frac{1}{2},$$

and the variance of  $\lceil X \rceil$  satisfies

$$(\sigma - 1)^2 \leq \mathbb{E}(\lceil X \rceil) - \mathbb{E} \lceil X \rceil)^2 \leq (\sigma + 1)^2.$$

*Proof of Lemma 11.* First consider the mean value of  $\lceil X \rceil$  for  $X \sim f$ . We have

$$\mathbb{E} \lceil X \rceil = \mathbb{E}[\lceil X \rceil - X] + \mathbb{E}[X] = \mu \pm \frac{1}{2}.$$

Consider the variance of  $\lceil X \rceil$  and apply inequality  $(a+b)^2 \leq a^2(1+1/t) + b^2(1+t), \forall t > 0$ .

$$\begin{aligned}
\mathbb{E}(\lceil X \rceil - \mathbb{E} \lceil X \rceil)^2 &= \int_{-\infty}^{\infty} (\lceil x \rceil - \mathbb{E} \lceil X \rceil)^2 \cdot f(x) dx \\
&= \int_{-\infty}^{\infty} (\lceil x \rceil - x + (x - \mathbb{E} X) + \mathbb{E} X - \mathbb{E} \lceil X \rceil)^2 \cdot f(x) dx \\
&\leq \int_{-\infty}^{\infty} \left( (\lceil x \rceil - x + \mathbb{E} X - \mathbb{E} \lceil X \rceil)^2 \left(1 + \frac{1}{t}\right) + (x - \mathbb{E} X)^2 (1+t) \right) f(x) dx \\
&\leq \int_{-\infty}^{\infty} \left( \left(1 + \frac{1}{t}\right) + (x - \mathbb{E} X)^2 (1+t) \right) f(x) dx \\
&= 1 + \frac{1}{t} + t\sigma^2 + \sigma^2 \\
&= (\sigma + 1)^2.
\end{aligned}$$

By a different inequality,  $(a+b)^2 \geq a^2(1-1/t) + b^2(1-t), \forall t > 0$ , we also have

$$\mathbb{E}(\lceil X \rceil - \mathbb{E} \lceil X \rceil)^2 \geq (\sigma - 1)^2. \quad \square$$

By the above lemma, for almost any  $\sigma \geq 1$ , we can construct a discrete log-concave distribution of variance  $\sigma^2$  if there is a continuous one with roughly the same variance.

Next, letting  $p_G$  denote the distribution of  $\lceil X \rceil$  for  $X \sim \mathcal{N}(\mu, \sigma^2)$ , we lower bound  $\mathcal{H}_n^S(p_G)$  (effectively, the profile entropy  $\mathcal{H}_n(p_G)$ ). By definition, this discretized Gaussian, which we write as  $\lceil \mathcal{N} \rceil(\mu, \sigma^2)$ , has a distribution in the form of

$$p_G(z) := \frac{1}{\sqrt{2\pi}\sigma} \int_{z-\frac{1}{2}}^{z+\frac{1}{2}} \exp\left(-\frac{(x-\mu)^2}{2\sigma^2}\right) dx, \quad \forall z \in \mathbb{Z}.$$

Through the subsequent analysis, we show that

**Lemma 12.** *Under the aforementioned conditions,*

$$H_n^S(p_G) \geq \Omega\left(\frac{1}{\log n}\right) \left(\sigma \wedge \frac{n}{\sigma}\right).$$

The lower bound in Theorem 6 follows by these inequalities.

*Proof.* At it is clear from the context, we write  $p$  instead of  $p_G$ . Recall that

$$H_n^S(p) = \sum_{j \geq 1} \min\{p_{I_j}, j \cdot \log n\},$$

where  $p_{I_j}$  denotes the number of probabilities belonging to  $I_j = ((j-1)^2, j^2] \cdot (\log n)/n$ . Computing the quantity for part of the distribution can only reduce the value of  $H_n^S(p)$ . Hence, we will focus on symbols in the  $(\mu + 1, \infty) \cap \mathbb{Z}$  range, over which the probability mass function  $p(z)$  is monotone.

We will further assume that  $n/\log n \gg \sigma \gg \log n$ , since otherwise the right-hand side of the inequality reduces to  $\mathcal{O}(1)$ , and the result follows by  $H_n^S(p) \geq 1$  for all  $n$  and  $p$ . In addition, we focus on  $j \gg 1$  in the following argument, as the contribution to from  $j = \mathcal{O}(1)$  is relatively small.

Given these assumptions, we have

$$\begin{aligned}
p(z) \in I_j &\iff \frac{1}{\sqrt{2\pi}\sigma} \exp\left(-\frac{(z \pm 1/2 - \mu)^2}{2\sigma^2}\right) \in \left((j-1)^2 \frac{\log n}{n}, j^2 \frac{\log n}{n}\right] \\
&\iff z \pm 1/2 - \mu \in \sqrt{2\sigma} \left[\sqrt{c(\sigma, n) - 2 \log j}, \sqrt{c(\sigma, n) - 2 \log(j-1)}\right),
\end{aligned}$$

where  $c(\sigma, n) := \log(n/(\sqrt{2\pi}\sigma \log n))$  and the interval is well-defined iff

$$c(\sigma, n) \geq 2 \log j \iff \frac{n}{\sqrt{2\pi}\sigma \log n} \geq j^2 \iff \sqrt{\frac{n}{\sqrt{2\pi}\sigma \log n}} \geq j \iff \sqrt{\frac{n}{\sigma \log n}} \geq 2j.$$

For clarity, we divide our analysis into two cases:  $\sqrt{n} \geq \sigma \gg \log n$  and  $n/\log n \gg \sigma > \sqrt{n}$ .

For the first case and  $j \leq \sqrt{\sigma/\log n}/2 \leq \sqrt{n/(\sigma \log n)}/2$ , the length  $L_j$  of the above interval, which equals to  $p_{I_j}$  up to an additive slack of 2, satisfies

$$\begin{aligned} \frac{L_j}{\sqrt{2}\sigma} &= \sqrt{c(\sigma, n) - 2\log(j-1)} - \sqrt{c(\sigma, n) - 2\log j} \\ &= \frac{2\log(j/(j-1))}{(c(\sigma, n) - 2\log(j-1)) + (c(\sigma, n) - 2\log j)} \\ &= \frac{\log(j/(j-1))}{\log(n/(\sqrt{2\pi}j(j-1)\sigma \log n))} \\ &= \Omega\left(\frac{1}{\log n} \log\left(1 + \frac{1}{j-1}\right)\right) \\ &= \Omega\left(\frac{1}{j \log n}\right). \end{aligned}$$

Therefore, we have  $L_j = \Omega(\sigma/(j \log n))$ . Since  $\sigma \gg \log n$  ensures  $L_j \geq 3$  and  $j \leq \sqrt{\sigma/\log n}/2$  is equivalent to  $\sigma \geq 4j^2 \log n$ , the lower bound on  $L_j$  transforms into  $p_{I_j} \geq \Omega(j)$ . Hence in this case,  $H_n^S(p)$  admits the following bound

$$H_n^S(p) = \sum_{j \geq 1} \min\{p_{I_j}, j \cdot \log n\} \geq \sum_{j=\mathcal{O}(1)}^{\sqrt{\sigma/\log n}/2} \Omega(j) = \Omega\left(\frac{\sigma}{\log n}\right).$$

In the  $n/\log n \gg \sigma > \sqrt{n}$  case, we have  $\sqrt{\sigma/\log n} > \sqrt{n/(\sigma \log n)}$ . Repeating the previous reasoning for  $j \leq \sqrt{n/(\sigma \log n)}/2$ , we again obtain  $L_j = \Omega(\sigma/(j \log n))$  and  $p_{I_j} \geq \Omega(j)$ .

Therefore,

$$H_n^S(p) = \sum_{j \geq 1} \min\{p_{I_j}, j \cdot \log n\} \geq \sum_{j=\mathcal{O}(1)}^{\sqrt{n/(\sigma \log n)}/2} \Omega(j) = \Omega\left(\frac{n}{\sigma \log n}\right).$$

Finally, note that in the first case,  $\min\{\sigma, n/\sigma\} = \sigma$ , and in the second,  $\min\{\sigma, n/\sigma\} = n/\sigma$ .

Consolidating these results yields the desired lower bound

$$\mathcal{O}(\log n) \cdot H_n^S(p) \geq \sigma \wedge \frac{n}{\sigma}. \quad \square$$

Next we proceed to the upper bound.

For any sample  $X^n \sim p$ , the profile dimension  $\mathcal{D}(X^n)$  is at most the number of distinct symbols in the sample. It is well known that the tail probability of a log-concave distribution decays exponentially fast. Hence, the effective support size of  $p$  with respect to  $X^n$  is  $\tilde{\mathcal{O}}(\sigma + 1)$ , beyond which the tail probabilities can be as small as  $1/n^3$  (the asymptotic notation hides logarithmic factors of  $n$ ). Given this, even we sample from  $p$  for  $n$  times, the probability that we get only  $\tilde{\mathcal{O}}(\sigma + 1)$  distinct symbols is at least  $(1 - 1/n^3)^n \geq 1 - 1/n$ . Therefore, we have  $\mathcal{H}_n(p) \simeq \mathcal{D}(X^n) \lesssim \sigma + 1$ .

Now, we extend this argument to a  $t$ -mixture of log-concave distributions with variances  $\sigma_i^2, i \in [t]$ . For a length- $n$  sample from this a distribution, the number of sample points from each mixture component is at most  $n$ . Hence, with high probability, the number of distinct symbols in a length- $n$  sample is at most  $\sum \sigma_i + t$ , up to logarithmic factors of  $n$ .

For the other part of the upper bound, we can assume that  $\sigma \geq \sqrt{n}$  (otherwise we need to consider only the above case) and  $n$  is larger than some absolute constant. Then by a concentration inequality in [Diakonikolas et al. \[2016\]](#), the maximum probability  $p_{\max}$  of  $p$  belongs to  $[1/(8\sigma), 1/\sigma]$ . Hence, the last index  $J$  for which  $p_{I_J} \neq 0$  satisfies

$$(J-1)^2 \frac{\log n}{n} \leq \frac{1}{\sigma} \iff J \leq \sqrt{\frac{n}{\sigma \log n}} + 1.$$



Therefore, we have

$$\mathcal{H}_n^S(p) = \sum_{j \geq 1} \min \{p_{I_j}, j \cdot \log n\} \leq \log n + \sum_{j=1}^{\sqrt{n/(\sigma \log n)+1}} j \cdot \log n \leq \mathcal{O}(\log n) \left(1 + \frac{n}{\sigma}\right).$$

Our upper bound is uniformly better than the  $\min\{\sigma, (n^2/\sigma)^{1/3}\}$  bound in [Hao and Orlicsky \[2019b\]](#), which is derived for  $\mathcal{D}_n \sim p$ . More importantly, we actually provide a complete characterization of the profile entropy value that is optimal up to logarithmic factors.

Next, we extend the  $n/\sigma$  bound to the mixture model. Write the mixture distribution as  $p := \sum_i w_i \cdot p_i$ , with  $w_i$ 's being the mixing weights and  $p_i$ 's being log-concave distributions with variances  $\sigma_i^2$ , respectively for  $1 \leq i \leq t$ . It is clear that  $p_{\max}$  in this case is at most the maximum probability of some  $p_i$ , which at most  $\max_i 1/\sigma_i$ . The rest of the proof is the same as above.  $\square$

### D.3 Theorem 7: Power-Law Family

**Power-law** Power-law is a ubiquitous structure appearing in many situations of scientific interest, ranging from natural phenomena such as the initial mass function of stars [[Kroupa, 2001](#)], species and genera [[Humphries et al., 2010](#)], rainfall [[Machado and Rossow, 1993](#)], population dynamics [[Taylor, 1961](#)], and brain surface electric potential [[Miller et al., 2009](#)], to human-made circumstances such as the word frequencies in a text [[Baayen, 2002](#)], income rankings [[Drăgulescu and Yakovenko, 2001](#)], company sizes [[Axtell, 2001](#)], and internet topology [[Faloutsos et al., 1999](#)].

Formally, a discrete distribution  $p \in \Delta_{\mathbb{Z}}$  is a *power-law with power  $\alpha \geq 0$*  if  $p$  has a support of  $[k] := \{1, \dots, k\}$  for some  $k \in \mathbb{Z}^+ \cup \{\infty\}$  and  $p_x \propto x^{-\alpha}$  for all  $x \in [k]$ . Note that if  $\alpha \in [0, 1]$ , the distribution is well-defined for only finite  $k$ . The next result fully characterizes the profile entropy of power-laws over the entire ranges of  $\alpha, n$ , and  $k$ .

**Theorem 7.** *Let  $p \in \Delta_{[k]}$  be a power-law distribution with power  $\alpha$ . Then,*

$$\mathcal{H}_n(p) \simeq \begin{cases} k & \text{if } \alpha > \frac{k^{1+\alpha}}{n} \vee 1 \text{ or } 1 \geq \alpha > \frac{k^2}{n}, \\ n^{\frac{1}{\alpha+1}} & \text{if } \frac{k^{1+\alpha}}{n} \geq \alpha > 1, \\ \left(\frac{n}{k^{1-\alpha}}\right)^{\frac{1}{1+\alpha}} & \text{if } \frac{k^2}{n} \wedge 1 \geq \alpha > \frac{k^{1-\alpha}}{n}, \\ \frac{n}{k^{1-\alpha}} - \frac{n}{k} & \text{if } \frac{k^{1-\alpha}}{n} \wedge 1 \geq \alpha \text{ and } \alpha \geq 2 \log_k \left(7\sqrt{\frac{k}{n}} + 1\right), \\ k \wedge \sqrt{\frac{n}{k^{1-\alpha}}} & \text{if } \frac{k^{1-\alpha}}{n} \wedge 1 \geq \alpha \text{ and } 2 \log_k \left(7\sqrt{\frac{k}{n}} + 1\right) > \alpha. \end{cases}$$

*In particular, as  $\alpha \rightarrow 0$ , the bound degenerates to  $k \wedge \sqrt{\frac{n}{k}}$ , which is at most  $n^{\frac{1}{3}}$ .*

Since a power-law sample profile is completely specified by  $\alpha, k$ , and  $n$ , the above theorem directly applies to model parameter estimation. Specifically, we first compute  $\mathcal{D}_n \sim p$ , which is a simple function of the symbol counts. By [Theorem 1](#), we can then use it to approximate  $\mathcal{H}_n(p)$ . Finally, we utilize the characterization theorem and find the parameter relations (testing might be necessary).

The theorem fully characterizes the profile entropy of power-laws and is significantly better than the basic  $\{k, \sqrt{n \log n}\}$  bound for both  $k \gg \sqrt{n}$  and  $k \ll \sqrt{n}$ . We can see how different parameter interplay with each other and leverage these relations in applications such as parameter estimation. In comparison, a result in [Hao and Orlicsky \[2019b\]](#), when combined with our entropy-dimension equivalence theorem, yields only an  $n^{1/(1+\alpha)}$  upper bound (and no lower bounds nor the right dependence on  $k$ ), which is clearly suboptimal and provides no improvement over  $\sqrt{n \log n}$  for  $\alpha < 1$ .

### D.4 Proof of Theorem 7

*Proof.* For the ease of exposition, write the probability of symbol  $i$  assigned by distribution  $p$  as  $p_i := c_\alpha^{-1} \cdot i^{-\alpha}$ , where  $c_\alpha$  is a normalizing constant that implicitly depends on  $k$ . Note that

$$\frac{k^{1-\alpha}}{1-\alpha} + \frac{\alpha}{1-\alpha} \geq 1 + \int_1^k x^{-\alpha} dx \geq c_\alpha = \sum_{i=1}^k i^{-\alpha} \geq \int_1^{k+1} x^{-\alpha} dx = \frac{(k+1)^{1-\alpha}}{1-\alpha} - \frac{1}{1-\alpha}.$$

Basic calculus shows that, up to logarithmic factors, we can approximate the normalizing constant as

$$c_\alpha = \sum_{i=1}^k \frac{1}{i^\alpha} \simeq k^{1-\alpha} \vee 1,$$

Recall that the quantity of interest is essentially

$$H_n^S(p) = \sum_{j \geq 1} \min \{p_{I_j}, j \cdot \log n\}.$$

It will be convenient to denote  $c := c(\alpha, k, n) := (c_\alpha \log n)/n \simeq (k^{1-\alpha} \vee 1)/n$ . First, consider  $p_{I_j}$  for a sufficiently large  $j$  (i.e.,  $j \gg 1$ ) and note that

$$\begin{aligned} p_i \in I_j &\iff \frac{1}{c_\alpha i^\alpha} \in \left( (j-1)^2 \frac{\log n}{n}, j^2 \frac{\log n}{n} \right] \\ &\iff i \in I'_j := \left[ (j^2 c)^{-\frac{1}{\alpha}}, ((j-1)^2 c)^{-\frac{1}{\alpha}} \right). \end{aligned}$$

Observe that the length  $L_j$  of interval  $I'_j$ , which differs from the value of  $p_{I_j}$  by at most 2, is proportional to  $(j-1)^{-2/\alpha} - j^{-2/\alpha}$ , and hence is a decreasing function of  $j$ . Furthermore, each term  $\min\{p_{I_j}, j \cdot \log n\} \approx \min\{L_j, j \cdot \log n\}$  is basically the minimum between this decreasing function and  $j \log n$ , an increasing function of  $j$ . This naturally calls for determining the value of  $j$  at which the two functions are equal. Concretely,

$$((j-1)^2 c)^{-\frac{1}{\alpha}} - (j^2 c)^{-\frac{1}{\alpha}} = j \log n \implies j \simeq J := \left( \frac{1}{\alpha^\alpha c} \right)^{\frac{1}{2+2\alpha}},$$

where  $J$  implicitly depends on  $\alpha$  and  $n$ . In addition, since probability  $p_i$  vanishes if  $i \notin [1, k]$ , we need to consider only  $\sqrt{1/(ck^\alpha)} + 1 \leq j \leq \sqrt{1/c}$ .

We can decompose the summation  $H_n^S(p)$  into two parts. The first part consists of indices  $j \leq J$ ,

$$H_{n,1}^S(p) := \sum_{j=\sqrt{1/(ck^\alpha)}+1}^{J \wedge \sqrt{1/c}} \min \{p_{I_j}, j \cdot \log n\} \simeq \sum_{j=\sqrt{1/(ck^\alpha)}+1}^{J \wedge \sqrt{1/c}} j.$$

Correspondingly, the second part consists of indices  $j \geq J$ . For these indices  $j$ , we have  $L_j \leq j \cdot \log n$ . Recall that  $I'_j$  specifies the range of  $i$  satisfying  $p_i \in I_j$ . Then the second part satisfies

$$H_{n,2}^S(p) := \sum_{j=J \vee (\sqrt{1/(ck^\alpha)}+1)}^{\sqrt{1/c}} \min \{p_{I_j}, j \cdot \log n\} \simeq \sum_{j=J \vee (\sqrt{1/(ck^\alpha)}+1)}^{\sqrt{1/c}} L_j,$$

where the inequality follows by the fact that the intervals  $I'_j$  are consecutive. In addition, note that the left end point of  $I'_j$  equals  $(J^2 c)^{-\frac{1}{\alpha}} = (\alpha/c)^{\frac{1}{1+\alpha}}$ .

The rest of the proof follows by dividing the analysis into several cases according to whether  $\alpha > 1$  and the relative magnitude of  $J$ ,  $\sqrt{1/c}$ , and  $(\sqrt{1/(ck^\alpha)} + 1)$ .

For a concrete example, if  $\alpha > 1$ , then our approximation of  $c_\alpha$  becomes  $c_\alpha \simeq 1$ , hence  $c \simeq 1/n$ , and it is also clear that  $J = 1/(\alpha^\alpha c)^{\frac{1}{2\alpha+2}} \leq \sqrt{1/c}$ . Therefore,

$$H_{n,1}^S(p) \simeq \sum_{j=\sqrt{1/(ck^\alpha)}+1}^J j.$$

Now, consider the relation between  $J$  and  $\sqrt{1/(ck^\alpha)}$ . By the continuity of profile entropy, we can treat  $c$  as  $1/n$ . If  $\alpha \geq k^{1+\alpha}/n$ , then  $J \leq \sqrt{1/(ck^\alpha)}$  and our upper bound for  $H_{n,1}^S(p)$  vanishes. The quantity of interest hence becomes  $H_{n,1}^S(p)$ , which equals to

$$H_n^S(p) = H_{n,2}^S(p) \simeq \sum_{j=\sqrt{1/(ck^\alpha)}+1}^{\sqrt{1/c}} L_j = k.$$

On the other hand, if  $\alpha < k^{1+\alpha}/n$ , then  $J \geq \sqrt{1/(ck^\alpha)} + 1$  and  $H_{n,1}^S(p)$  satisfies

$$H_{n,1}^S(p) \simeq \sum_{j=\sqrt{1/(ck^\alpha)}+1}^J j \leq J^2 \simeq \left(\frac{n}{\alpha^\alpha}\right)^{\frac{1}{\alpha+1}}.$$

Our approximation of  $H_{n,2}^S(p)$  reduces to

$$H_{n,2}^S(p) \simeq \sum_{j=J}^{\sqrt{1/c}} L_j \approx (J^2 c)^{-\frac{1}{\alpha}} = \left(\frac{\alpha}{c}\right)^{\frac{1}{\alpha}} \simeq (\alpha n)^{\frac{1}{\alpha+1}} \simeq n^{\frac{1}{\alpha+1}}.$$

Consolidating these bounds and noting  $\alpha^{\frac{1}{\alpha+1}} \in (1, 2)$  yield that  $H_n^S(p) \simeq n^{\frac{1}{\alpha+1}}$ . The expressions for  $\alpha < 1$  can be derived in the similar manner.  $\square$

## D.5 Theorem 8: Histogram Family

**Histogram** While histogram is among the most widely studied representations, histogram distributions' importance also rises with the rapid growth of data sizes in modern scientific applications. For example, *subsampling*, a generic strategy to handle large datasets, naturally induces a histogram distribution over different categories of the data. This induced distribution often summarizes vital data statistics, leveraging which yields efficient and flexible inference procedures.

Formally, a discrete distribution  $p \in \Delta_{\mathbb{Z}}$  is a *t-histogram* if we can partition its support into at most  $t$  pieces such that  $p$  takes the same probability value over each piece. The theorem below provides near-optimal bounds on the profile entropy of the *t-histogram* distributions.

**Theorem 8.** *Denote by  $\mathcal{I}_t \subseteq \Delta_{\mathbb{Z}}$  the collection of *t-histogram* distributions. Then,*

$$\max_{p \in \mathcal{I}_t} \mathcal{H}_n(p) \simeq (nt^2)^{\frac{1}{3}} \wedge \sqrt{n}.$$

In practical settings, the value of  $t$  is often poly-logarithmic in  $n$ , and the bound reduces to  $\tilde{\mathcal{O}}(n^{1/3})$ . For the particular case of  $t = 1$ , distribution  $p$  is uniform over some unknown contiguous support. This result overlaps with Theorem 7 with  $\alpha = 0$ , yielding the following bound.

**Corollary 5.** *For any uniform distribution  $p$  with support size  $k$ , we have  $\mathcal{H}_n(p) \simeq k \wedge \sqrt{\frac{n}{k}}$ .*

Next we consider mixtures of histogram distributions.

**Theorem 9.** *Let  $T$  be the positive integer sequence  $\{t_i\}_{i=1}^s$ . Denote by  $S_T$  the sum  $\sum_i t_i$ , and by  $\mathcal{I}_T$  the *s-mixture* of *t-histograms* with parameters specified by  $T$ . Then,*

$$\max_{p \in \mathcal{I}_T} \mathcal{H}_n(p) \simeq (nS_T^2)^{\frac{1}{3}} \wedge \sqrt{n}.$$

*Proof.* The proof follows by Theorem 8, which holds for any  $t$ , and the fact that  $\mathcal{I}_T$  coincides with the collection of all  $S_T$ -*histogram* distributions.  $\square$

## D.6 Proof of Theorem 8

*Proof.* First we establish the lower bound. Recall that the quantity of interest is essentially

$$H_n^S(p) = \sum_{j \geq 1} \min \{p_{I_j}, j \cdot \log n\}.$$

Our construction depends on the value of  $t$  as follows. Let  $A \cdot \{B\}$  denote the length- $A$  constant sequence with value  $B$ . If  $t = 1$ , distribution  $p$  has the following form

$$p := \tilde{\Theta}(n^{1/3}) \cdot \{p_0 \in I_{n^{1/3}}\},$$

where  $p_0$  is a properly chosen probability in  $I_{n^{1/3}}$  so that  $p$  is well-defined, and the range of support of distribution  $p$  is irrelevant for our purpose and hence unspecified. If  $2 \leq t < n^{1/4}/(2\sqrt{\log n})$ , then for some parameter  $s \geq 0$  to be determined, the distribution  $p$  has the following form

$$p := L \cdot \left\{ \frac{1}{n^2} \right\} \cup \left( \bigcup_{j=s+1}^{s+t-1} \left( (j \log n) \cdot \left\{ j^2 \frac{\log n}{n} \right\} \right) \right),$$

where the probability values are sorted according to the ordering they appear above, and  $L$  is a properly chosen to make the probabilities sum to 1. For the distribution to be well-defined, we require

$$\sum_{j=s+1}^{s+t-1} (j \log n) \cdot \left( j^2 \frac{\log n}{n} \right) \leq 1 \iff t(s+t)^3 \leq \frac{n}{\log^2 n} \iff s \leq \left( \frac{n}{t \log^2 n} \right)^{1/3} - t.$$

Note that the last inequality is valid if  $t < n^{1/4}/(2\sqrt{\log n})$ . Let  $s$  be the maximum integer satisfying the above inequality. Then,  $H_n^S(p)$  admits the lower bound

$$H_n^S(p) \geq \sum_{j=s+1}^{s+t-1} (j \log n) \geq \frac{(2s+t)(t-1)}{2} \log n \geq \frac{1}{4} \left( \frac{n}{t \log^2 n} \right)^{1/3} t \log n = \Omega((nt^2 \log n)^{1/3}).$$

Finally, if  $t \geq n_0 := n^{1/4}/(2\sqrt{\log n})$ , distribution  $p$  has the following form

$$p := (t - n_0 + 1) \cdot \{p_0\} \cup \left( \bigcup_{j=1}^{n_0-1} \left( (j \log n) \cdot \left\{ j^2 \frac{\log n}{n} \right\} \right) \right),$$

where  $p_0$  is a properly chosen to make the probabilities sum to 1. According to the previous reasoning, distribution  $p$  is well-defined and quantity  $H_n^S(p)$  satisfies

$$H_n^S(p) \geq \sum_{j=1}^{n_0-1} (j \log n) \geq \frac{n_0(n_0-1)}{2} \log n \geq \Omega(\sqrt{n}).$$

Consolidating these results yields the desired lower bound.

Regarding the upper bound, the work of [Hao and Orlitsky \[2019b\]](#) studies the profile dimension for distributions  $p \in \mathcal{I}_t$  and shows that

$$\mathbb{E}[\mathcal{D}_n] \lesssim (nt^2)^{\frac{1}{3}} \wedge \sqrt{n}.$$

Consolidating this inequality with [Theorem 1](#) (dimension-entropy equivalence) and [Corollary 4](#) (dimension concentration) yields the desired upper bound.  $\square$

## E Extensions

### E.1 Multi-Dimensional Profiles

As we elaborate below, the notion of profile generalizes to the multi-sequence setting.

Let  $\mathcal{X}$  be a finite or countably infinite alphabet. For every vector  $\vec{n} := (n_1, \dots, n_d) \in \mathbb{N}^d$  and tuple  $x^{\vec{n}} := (x_1^{n_1}, \dots, x_d^{n_d})$  of sequences in  $\mathcal{X}^*$ , the *multiplicity*  $\mu_y(x^{\vec{n}})$  of a symbol  $y \in \mathcal{X}$  is the vector of its frequencies in the tuple of sequences. The *profile* of  $x^{\vec{n}}$  is the multiset  $\varphi(x^{\vec{n}})$  of multiplicities of the observed symbols [[Acharya et al., 2010](#), [Das, 2012](#), [Charikar et al., 2019b](#)], and its *dimension* is the number  $\mathcal{D}(x^{\vec{n}})$  of distinct elements in the multiset. Drawing independent samples from each distribution in  $\vec{p} := (p_1, \dots, p_d) \in \Delta^d$ , the *profile entropy* is the entropy of the joint-sample profile.

Many of the previous results potentially generalize to this multi-dimensional setting. For example, the  $\sqrt{2n}$  bound on  $\mathcal{D}(x^{\vec{n}})$  in the 1-dimensional case becomes

**Theorem 20.** *For any  $\mathcal{X}$ ,  $\vec{n}$ , and  $x^{\vec{n}} \in \mathcal{X}^{\vec{n}}$ , there exists  $r > 0$  such that*

$$\sum_i n_i \geq \frac{(r+1)(r+2)}{d+1} \binom{d+r+1}{d-1} \quad \text{and} \quad \binom{d+r}{d} - 1 \geq \mathcal{D}(x^{\vec{n}}).$$

Note that this recovers the  $\sqrt{2n}$  bound for  $d = 1$ .

*Proof.* For simplicity, we suppress  $x^{\vec{n}}$  in  $\mathcal{D}(x^{\vec{n}})$ . Let  $\Delta_d$  denote the standard  $d$ -dimensional simplex. As each multiplicity corresponds to a vector in  $\mathbb{N}^d$ , in the ideal case, the profile that has the maximum

dimension  $\mathcal{D}$  corresponds to the integer points in the scaled simplex  $(r \cdot \Delta_d)$ , for some properly chosen parameter  $r > 0$ . For a valid choice of  $r$ , we have

$$\sum_i n_i \geq \sum_{t=0}^{r+1} \binom{t+d-1}{d-1} \cdot t = \frac{(r+1)(r+2)}{d+1} \binom{d+r+1}{d-1}$$

and

$$\mathcal{D} \leq \sum_{t=1}^r \binom{t+d-1}{t} = \binom{d+r}{d} - 1.$$

Consolidating these two inequalities yields the desired result.  $\square$

## E.2 Discrete Multivariate Gaussian Mixtures

Let  $\Sigma$  be a  $d \times d$  symmetric matrix with eigenvalues  $\sigma_d^2 \geq \dots \geq \sigma_1^2 \geq 1$  and  $\mu$  be a  $d$ -dimensional integer vector. The *discrete  $d$ -dimensional Gaussian* induced by  $(\mu, \Sigma)$  is specified by its *probability mass function*

$$p(x) := \frac{1}{C} \exp\left(-\frac{1}{2}(x-\mu)^T \Sigma^{-1}(x-\mu)\right), \forall x \in \mathbb{Z}^d.$$

where  $C_\Sigma := C(n, d, \Sigma) > 0$  is a normalizing constant. In this section, we show that for  $d \geq 9$ ,

$$\mathcal{H}_n(p) \lesssim \frac{n}{C} \wedge C \left( \gamma_d \exp\left(6d \frac{\sigma_d^2}{\sigma_1^2}\right) \left(\frac{2 \log n}{d}\right)^{d/2} \right),$$

where  $\gamma_d$  is a constant that appears in Lemma 14 and depends only on  $d$ . The bound resembles that in Theorem 6 for log-concave distributions. For  $d = 1$  with  $\Sigma = \sigma^2$ , the normalizing factor is  $C_\Sigma = \sqrt{2\pi}\sigma$ , and the right-hand side reduces to  $\tilde{\mathcal{O}}(\sigma \wedge n/\sigma)$  in Theorem 6.

Let us denote the multiplicative factor in the parentheses by  $F_\Sigma := F(n, d, \Sigma)$ . Just like Theorem 6 generalizes to 14, the above result generalizes to also mixtures of discrete  $d$ -dimensional Gaussians.

**Theorem 21.** *For a  $t$ -mixture  $p \in \Delta_{\mathbb{Z}^d}$  of discrete  $d$ -dimensional Gaussians with covariance matrices  $\Sigma_i$ , where  $1 \leq i \leq t$ , its profile entropy satisfies*

$$\mathcal{H}_n(p) \lesssim \left( \sum_i C_i F_{\Sigma_i} \right) \wedge \max_i \left\{ \frac{n}{C_i} \right\},$$

where the right-hand side is assumed to be at least  $t$  since otherwise  $\mathcal{H}_n(p) \lesssim t$ , and in practice,  $t$  is often a small quantity, e.g. a constant.

*Proof.* Below we establish Theorem 21 for  $t = 1$ . The proof of the general case follows by the subsequent reasoning and the arguments in Appendix D.2.

**Lower bound on  $C$**  First, we bound  $C_\Sigma$  from below in terms of the eigenvalues and other parameters. By symmetry, we can decompose the covariance matrix  $\Sigma$  as

$$\Sigma = V \Lambda V^T,$$

where  $\Lambda$  is a diagonal matrix with  $\Lambda_{ii} = \sigma_i^2$ , and  $V$  is an orthonormal matrix whose  $i$ -th column is the eigenvector  $v_i$  associated with  $\sigma_i^2$ .

Next, partition the real space  $\mathbb{R}^d$  into unit cubes whose vertices belong to  $\mathbb{Z}^d$ . For any two vectors  $\tilde{a}, \tilde{b} \in \mathbb{R}^d$  that belong to the same unit cube, we will bound the ratio between  $p(\tilde{a})$  and  $p(\tilde{b})$ . Denote  $a := \tilde{a} - \mu$  and  $b := \tilde{b} - \mu$ , and express  $a$  and  $b$  as linear combinations of eigenvectors,

$$a := \sum_{i=1}^d x_i \cdot v_i \text{ and } b := \sum_{i=1}^d y_i \cdot v_i.$$

The log-ratio between the induced probabilities satisfies

$$\begin{aligned}
-2 \log \frac{p(\tilde{a})}{p(\tilde{b})} &= a^T \Sigma^{-1} a - b^T \Sigma^{-1} b \\
&= (a + b)^T \Sigma^{-1} (a - b) \\
&= \left( \sum_i (x_i + y_i) \cdot v_i^T \right) V \Lambda^{-1} V^T \left( \sum_i (x_i - y_i) \cdot v_i \right) \\
&= \left( \sum_i (x_i + y_i) \cdot e_i^T \right) \Lambda^{-1} \left( \sum_i (x_i - y_i) \cdot e_i \right) \\
&= \sum_i \sigma_i^{-2} (x_i^2 - y_i^2).
\end{aligned}$$

Since by construction,  $\tilde{a} - \tilde{b} = a - b$  and  $\tilde{a}, \tilde{b}$  belong to the same unit cube, hence  $\sum_i (x_i - y_i)^2 = \|a - b\|_2^2 = \sum_i (\tilde{a}_i - \tilde{b}_i)^2 \leq d$ . Consequently, we bound the absolute value of the ratio by

$$\begin{aligned}
2 \left| \log \frac{p(\tilde{a})}{p(\tilde{b})} \right| &= \left| \sum_i \sigma_i^{-2} (x_i^2 - y_i^2) \right| \\
&\leq \sum_i \sigma_i^{-2} |x_i^2 - (x_i - (x_i - y_i))^2| \\
&\leq 2 \sum_i \sigma_i^{-2} (x_i^2 + (x_i - y_i)^2) \\
&\leq 2\sigma_1^{-2} \left( \sum_i x_i^2 + d \right) \\
&= 2\sigma_1^{-2} \left( \|\tilde{a} - \mu\|_2^2 + d \right).
\end{aligned}$$

Now, consider the hyper-ellipse  $E$  associated with

$$(x - \mu)^T \Sigma^{-1} (x - \mu) \leq d.$$

For any  $x \in E$ , simple algebra shows that  $\|x - \mu\|_2^2 \leq d\sigma_d^2$ . Hence by the previous discussion, for any unit cube  $U$  with vertices in  $\mathbb{Z}^d$ , there exists a vertex  $v_U$  (of  $U$ ) such that for any  $x \in U \cap E$ ,

$$\left| \log \frac{p(x)}{p(v_U)} \right| \leq \sigma_1^{-2} \left( \|x - \mu\|_2^2 + d \right) \leq \sigma_1^{-2} (d\sigma_d^2 + d) \leq 2d \left( \frac{\sigma_d}{\sigma_1} \right)^2.$$

Note that  $x \in E$  is equivalent to  $p(x) \geq \exp(-d/2)/C$ . Then, the probability mass over  $E$  is at least

$$\int_{x \in E} p(x) dx \geq \int_{x \in E} \frac{\exp(-d/2)}{C} = \frac{\exp(-d/2)}{C} \cdot \text{Vol}(E) = \frac{\exp(-d/2)}{C} \cdot \frac{(\pi d)^{d/2}}{\Gamma(d/2 + 1)} \prod_{i=1}^d \sigma_i.$$

On the other hand, this probability mass is at most

$$\int_{x \in E} p(x) dx = \sum_U \int_x p(x) \cdot \mathbf{1}_{x \in E \cap U} dx \leq \sum_U p(v_U) \cdot \exp \left( 2d \left( \frac{\sigma_d}{\sigma_1} \right)^2 \right) \leq \exp \left( 3d \left( \frac{\sigma_d}{\sigma_1} \right)^2 \right).$$

Consolidating the lower and upper bounds and multiplying both sides by  $C$  yield

$$\begin{aligned}
C &\geq \exp\left(-3d\left(\frac{\sigma_d}{\sigma_1}\right)^2\right) \exp\left(-\frac{d}{2}\right) \cdot \frac{(\pi d)^{d/2}}{\Gamma(d/2+1)} \prod_{i=1}^d \sigma_i \\
\implies C &\geq \exp\left(-3d\left(\frac{\sigma_d}{\sigma_1}\right)^2\right) \cdot \frac{(\pi d/e)^{d/2}}{\sqrt{e\pi(d/2)}(d/(2e))^{d/2}} \prod_{i=1}^d \sigma_i \\
\implies C &\geq \exp\left(-3d\left(\frac{\sigma_d}{\sigma_1}\right)^2\right) \cdot \frac{(2\pi)^{d/2}}{\sqrt{e\pi(d/2)}} \prod_{i=1}^d \sigma_i \\
\implies C &\geq \exp\left(-3d\left(\frac{\sigma_d}{\sigma_1}\right)^2\right) \prod_{i=1}^d \sigma_i.
\end{aligned}$$

where the first step follows by the lemma below.

**Lemma 13.** *For any integer or semi-integer  $x \geq 1/2$ ,*

$$\sqrt{2\pi x} \left(\frac{x}{e}\right)^x \leq \Gamma(x+1) \leq \sqrt{e\pi x} \left(\frac{x}{e}\right)^x.$$

**Upper bound** We proceed to bound  $\mathcal{H}_n^S(p) = \sum_{j \geq 1} \min\{p_{I_j}, j \cdot \log n\}$ .

Below we assume that  $C < n/\log n$ , since otherwise  $p(x) \leq (\log n)/n, \forall x$ , yielding an  $\mathcal{O}(\log n)$  upper bound on  $\mathcal{H}_n^S(p)$ . Then, by definition, the last index  $j$  for which  $p_{I_j} > 0$  satisfies

$$(j-1)^2 \frac{\log n}{n} \leq \frac{1}{C} \implies j \leq 1 + \sqrt{\frac{1}{C} \frac{n}{\log n}} \leq 2\sqrt{\frac{1}{C} \frac{n}{\log n}}.$$

Denote by  $J$  the quantity on the right-hand side. Then,

$$\sum_{j \geq 1} \min\{p_{I_j}, j \cdot \log n\} \leq \sum_{j=1}^J j \log n \leq J^2 \log n \leq \frac{4n}{C}.$$

Furthermore, by a reasoning similar to the above, the collection of points  $x \in \mathbb{Z}^d$  satisfying  $p(x) \leq 1/(Cn) = p(\mu)/n \leq 1/n$  contributes at most  $\mathcal{O}(\log n)$  to  $\mathcal{H}_n^S(p)$ . Hence we need to analyze only points  $x$  satisfying  $p(x) > 1/(Cn)$ . Equivalently, those in

$$E^* := \left\{x \in \mathbb{Z}^d : (x - \mu)^T \Sigma^{-1} (x - \mu) \leq 2 \log n\right\}.$$

Clearly, these points contribute at most  $|E^*|$  to the sum. Noting that  $E^*$  is a discrete hyper-ellipse, we can bound its cardinality by the following lemma in [Bentkus and Götze \[1997\]](#).

**Lemma 14.** *Let  $\mu \in \mathbb{R}^d$  be a mean vector, and  $\Sigma \in \mathbb{R}^{d \times d}$  be a real covariance matrix with nonzero eigenvalues  $\sigma_1^2 \leq \dots \leq \sigma_d^2$ . For any  $d \geq 9$  and  $t \geq \sigma_d^2$ , the discrete ellipsoid*

$$E(t) := \left\{x \in \mathbb{Z}^d : (x - \mu)^T \Sigma^{-1} (x - \mu) \leq t\right\}$$

*admits the following inequality on its cardinality,*

$$|E(t)| \leq \left(1 + \frac{\gamma_d}{t} \frac{1}{\sigma_d^2} \left(\frac{\sigma_d}{\sigma_1}\right)^{2d+4}\right) \frac{(\pi t)^{d/2}}{\Gamma(d/2+1)} \prod_{i=1}^d \sigma_i,$$

where  $\gamma_d > 1$  is a constant that depends only on  $d$ .

Applying the above lemma to bound  $|E^*|$  (where  $t = 2 \log n$ ) and combining the result with our lower bound on  $C$  yield

$$\begin{aligned}
|E(2 \log n)| &\leq \left(1 + \frac{\gamma_d}{2 \log n} \frac{1}{\sigma_d^2} \left(\frac{\sigma_d}{\sigma_1}\right)^{2d+4}\right) \frac{(2\pi \log n)^{d/2}}{\Gamma(d/2 + 1)} \exp\left(3d \left(\frac{\sigma_d}{\sigma_1}\right)^2\right) C \\
&\leq \left(1 + \frac{\gamma_d}{2 \log n} \frac{1}{\sigma_d^2} \left(\frac{\sigma_d}{\sigma_1}\right)^{2d+4}\right) \frac{1}{\sqrt{\pi d}} \left(4e\pi \frac{\log n}{d}\right)^{d/2} e^{3d(\sigma_d/\sigma_1)^2} C \\
&\leq \left(1 + \frac{\gamma_d}{2 \log n} \left(\frac{\sigma_d}{\sigma_1}\right)^{3d}\right) \left(\frac{2 \log n}{d}\right)^{d/2} e^{5d(\sigma_d/\sigma_1)^2} C \\
&\leq \gamma_d \left(\frac{\sigma_d}{\sigma_1}\right)^{3d} \left(\frac{2 \log n}{d}\right)^{d/2} e^{5d(\sigma_d/\sigma_1)^2} C \\
&\leq \gamma_d \left(\frac{2 \log n}{d}\right)^{d/2} e^{6d(\sigma_d/\sigma_1)^2} C,
\end{aligned}$$

where the second step follows by Lemma 13.

To summarize, we have established the desired bound

$$\mathcal{H}_n^S(p) \leq \mathcal{O}(\log n) \left(1 + \min\left\{\frac{n}{C}, \gamma_d(\alpha_\Sigma \cdot \beta_{d,n})^d \cdot C\right\}\right). \quad \square$$

## References

- Jayadev Acharya, Hirakendu Das, Alon Orlitsky, Shengjun Pan, and Narayana P Santhanam. Classification using pattern probability estimators. In *2010 IEEE International Symposium on Information Theory*, pages 1493–1497. IEEE, 2010.
- Jayadev Acharya, Hirakendu Das, Ashkan Jafarpour, Alon Orlitsky, and Shengjun Pan. Competitive closeness testing. In *Proceedings of the 24th Annual Conference on Learning Theory*, pages 47–68, 2011.
- Jayadev Acharya, Hirakendu Das, Ashkan Jafarpour, Alon Orlitsky, Shengjun Pan, and Ananda Suresh. Competitive classification and closeness testing. In *Conference on Learning Theory*, pages 22–1, 2012.
- Jayadev Acharya, Ashkan Jafarpour, Alon Orlitsky, and Ananda Theertha Suresh. Optimal probability estimation with applications to prediction and classification. In *Conference on Learning Theory*, pages 764–796, 2013.
- Jayadev Acharya, Alon Orlitsky, Ananda Theertha Suresh, and Himanshu Tyagi. Estimating rényi entropy of discrete distributions. *IEEE Transactions on Information Theory*, 63(1):38–56, 2016.
- Jayadev Acharya, Hirakendu Das, Alon Orlitsky, and Ananda Theertha Suresh. A unified maximum likelihood approach for estimating symmetric properties of discrete distributions. In *International Conference on Machine Learning*, pages 11–21, 2017.
- Mark Yuying An. Log-concave probability distributions: Theory and statistical testing. *Duke University Dept of Economics Working Paper*, 95(3), 1997.
- Nima Anari, Moses Charikar, Kirankumar Shiragur, and Aaron Sidford. Instance based approximations to profile maximum likelihood. In *Advances in Neural Information Processing Systems*, 2020.
- Chris Anderson. *The long tail: Why the future of business is selling less of more*. Hachette Books, 2006.
- Erdal Arıkan. An inequality on guessing and its application to sequential decoding. *IEEE Transactions on Information Theory*, 42(1):99–105, 1996.



- Rubén Armañanzas, Iñaki Inza, Roberto Santana, Yvan Saeys, Jose Luis Flores, Jose Antonio Lozano, Yves Van de Peer, Rosa Blanco, Víctor Robles, Concha Bielza, et al. A review of estimation of distribution algorithms in bioinformatics. *BioData mining*, 1(1):6, 2008.
- Robert L Axtell. Zipf distribution of US firm sizes. *science*, 293(5536):1818–1820, 2001.
- R Harald Baayen. *Word frequency distributions*, volume 18. Springer Science & Business Media, 2002.
- Alexander Barvinok. Computing the permanent of (some) complex matrices. *Foundations of Computational Mathematics*, 16(2):329–342, 2016.
- Alexander I Barvinok. Two algorithmic results for the traveling salesman problem. *Mathematics of Operations Research*, 21(1):65–84, 1996.
- Vidmantas Bentkus and Friedrich Götze. On the lattice point problem for ellipsoids. *Acta Arithmetica*, 80(2):101–125, 1997.
- Dietrich Braess and Thomas Sauer. Bernstein polynomials and learning theory. *Journal of Approximation Theory*, 128(2):187–206, 2004.
- Moses Charikar, Kirankumar Shiragur, and Aaron Sidford. The Bethe approximation for structured matrices: an improved approximation for the profile maximum likelihood. In *NeurIPS 2019 Workshop on Information Theory and Machine Learning*, 2019a.
- Moses Charikar, Kirankumar Shiragur, and Aaron Sidford. Efficient profile maximum likelihood for universal symmetric property estimation. In *Proceedings of the 51st Annual ACM SIGACT Symposium on Theory of Computing*, pages 780–791, 2019b.
- Stanley F Chen and Joshua Goodman. An empirical study of smoothing techniques for language modeling. *Computer Speech & Language*, 13(4):359–394, 1999.
- Imre Csiszar and János Körner. *Information theory: coding theorems for discrete memoryless systems*. Cambridge University Press, 2011.
- Hirakendu Das. *Competitive tests and estimators for properties of distributions*. PhD thesis, UC San Diego, 2012.
- Ilias Diakonikolas, Daniel M Kane, and Alistair Stewart. Efficient robust proper learning of log-concave distributions. *arXiv preprint arXiv:1606.03077*, 2016.
- Adrian Drăgulescu and Victor M Yakovenko. Exponential and power-law probability distributions of wealth and income in the United Kingdom and the United States. *Physica A: Statistical Mechanics and its Applications*, 299(1-2):213–221, 2001.
- Michalis Faloutsos, Petros Faloutsos, and Christos Faloutsos. On power-law relationships of the internet topology. *ACM SIGCOMM computer communication review*, 29(4):251–262, 1999.
- Yanjun Han, Jiantao Jiao, and Tsachy Weissman. Local moment matching: A unified methodology for symmetric functional estimation and distribution estimation under Wasserstein distance. *arXiv preprint arXiv:1802.08405*, 2018.
- Yi Hao and Ping Li. Bessel smoothing and multi-distribution property estimation. In *Conference on Learning Theory*, pages 1817–1876, 2020.
- Yi Hao and Alon Orlitsky. The broad optimality of profile maximum likelihood. In *Advances in Neural Information Processing Systems*, pages 10989–11001, 2019a.
- Yi Hao and Alon Orlitsky. Doubly-competitive distribution estimation. In *International Conference on Machine Learning*, pages 2614–2623, 2019b.
- Yi Hao and Alon Orlitsky. Unified sample-optimal property estimation in near-linear time. In *Advances in Neural Information Processing Systems*, pages 11106–11116, 2019c.

- Yi Hao and Alon Orlitsky. Data amplification: Instance-optimal property estimation. In *International Conference on Machine Learning*, 2020.
- Yi Hao, Alon Orlitsky, Ananda Theertha Suresh, and Yihong Wu. Data amplification: A unified and competitive approach to property estimation. In *Advances in Neural Information Processing Systems*, pages 8834–8843, 2018.
- Godfrey H Hardy and Srinivasa Ramanujan. Asymptotic formulae in combinatory analysis. *Proceedings of the London Mathematical Society*, 2(1):75–115, 1918.
- Jean Hausser and Korbinian Strimmer. Entropy inference and the James-Stein estimator, with application to nonlinear gene association networks. *Journal of Machine Learning Research*, 10 (Jul):1469–1484, 2009.
- Erwan Hillion, Oliver Johnson, et al. A proof of the shepp–olkin entropy monotonicity conjecture. *Electronic Journal of Probability*, 24, 2019.
- Nicolas E Humphries, Nuno Queiroz, Jennifer RM Dyer, Nicolas G Pade, Michael K Musyl, Kurt M Schaefer, Daniel W Fuller, Juerg M Brunnschweiler, Thomas K Doyle, Jonathan DR Houghton, et al. Environmental context explains Lévy and Brownian movement patterns of marine predators. *Nature*, 465(7301):1066–1069, 2010.
- Jiantao Jiao, Kartik Venkat, Yanjun Han, and Tsachy Weissman. Minimax estimation of functionals of discrete distributions. *IEEE Transactions on Information Theory*, 61(5):2835–2885, 2015.
- Jiantao Jiao, Yanjun Han, and Tsachy Weissman. Minimax estimation of the  $l_1$  distance. *IEEE Transactions on Information Theory*, 64(10):6672–6706, 2018.
- Sudeep Kamath, Alon Orlitsky, Dheeraj Pichapati, and Ananda Theertha Suresh. On learning distributions from their samples. In *Conference on Learning Theory*, pages 1066–1100, 2015.
- Daphne Koller and Nir Friedman. *Probabilistic graphical models: principles and techniques*. MIT press, 2009.
- Weihao Kong and Gregory Valiant. Estimating learnability in the sublinear data regime. In *Advances in Neural Information Processing Systems*, pages 5455–5464, 2018.
- Weihao Kong, Gregory Valiant, and Emma Brunskill. Sublinear optimal policy value estimation in contextual bandits. *arXiv preprint arXiv:1912.06111*, 2019.
- Pavel Kroupa. On the variation of the initial mass function. *Monthly Notices of the Royal Astronomical Society*, 322(2):231–246, 2001.
- Erich Leo Lehmann. Some concepts of dependence. *The Annals of Mathematical Statistics*, pages 1137–1153, 1966.
- László Lovász and Santosh Vempala. The geometry of logconcave functions and sampling algorithms. *Random Structures & Algorithms*, 30(3):307–358, 2007.
- LAT Machado and WB Rossow. Structural characteristics and radiative properties of tropical cloud clusters. *Monthly Weather Review*, 121(12):3234–3260, 1993.
- Anne E Magurran. *Measuring biological diversity*. John Wiley & Sons, 2013.
- Kai J Miller, Larry B Sorensen, Jeffrey G Ojemann, and Marcel Den Nijs. Power-law scaling in the brain surface electric potential. *PLoS computational biology*, 5(12), 2009.
- Michael Mitzenmacher. A brief history of generative models for power law and lognormal distributions. *Internet mathematics*, 1(2):226–251, 2004.
- Alon Orlitsky and Ananda Theertha Suresh. Competitive distribution estimation: Why is Good-Turing good. In *Advances in Neural Information Processing Systems*, pages 2143–2151, 2015.
- Alon Orlitsky, Narayana P Santhanam, Krishnamurthy Viswanathan, and Junan Zhang. On modeling profiles instead of values. In *Proceedings of the 20th conference on Uncertainty in artificial intelligence*, pages 426–435. AUAI Press, 2004.

- Alon Orlitsky, Ananda Theertha Suresh, and Yihong Wu. Optimal prediction of the number of unseen species. *Proceedings of the National Academy of Sciences*, 113(47):13283–13288, 2016.
- Dmitri S Pavlichin, Jiantao Jiao, and Tsachy Weissman. Approximate profile maximum likelihood. *Journal of Machine Learning Research*, 20(122):1–55, 2019.
- Adrien Saumard and Jon A Wellner. Log-concavity and strong log-concavity: a review. *Statistics surveys*, 8:45, 2014.
- Thomas Schürmann and Peter Grassberger. Entropy estimation of symbol sequences. *Chaos: An Interdisciplinary Journal of Nonlinear Science*, 6(3):414–427, 1996.
- Richard P Stanley. Log-concave and unimodal sequences in algebra, combinatorics, and geometry. *Ann. New York Acad. Sci*, 576(1):500–535, 1989.
- Lionel Roy Taylor. Aggregation, variance and the mean. *Nature*, 189(4766):732–735, 1961.
- Gregory Valiant and Paul Valiant. Estimating the unseen: an  $n/\log(n)$ -sample estimator for entropy and support size, shown optimal via new CLTs. In *Proceedings of the forty-third annual ACM symposium on Theory of computing*, pages 685–694, 2011.
- Gregory Valiant and Paul Valiant. Instance optimal learning of discrete distributions. In *Proceedings of the forty-eighth annual ACM symposium on Theory of Computing*, pages 142–155, 2016.
- Paul Valiant and Gregory Valiant. Estimating the unseen: improved estimators for entropy and other properties. In *Advances in Neural Information Processing Systems*, pages 2157–2165, 2013.
- Pascal O Vontobel. The Bethe approximation of the pattern maximum likelihood distribution. In *2012 IEEE International Symposium on Information Theory Proceedings*. IEEE, 2012.
- Pascal O Vontobel. The Bethe and Sinkhorn approximations of the pattern maximum likelihood estimate and their connections to the Valiant-Valiant estimate. In *2014 Information Theory and Applications Workshop (ITA)*, pages 1–10. IEEE, 2014.
- Jacob Wolfowitz. *Coding theorems of information theory*, volume 31. Springer Science & Business Media, 2012.
- Yihong Wu and Pengkun Yang. Minimax rates of entropy estimation on large alphabets via best polynomial approximation. *IEEE Transactions on Information Theory*, 62(6):3702–3720, 2016.
- Yihong Wu, Pengkun Yang, et al. Chebyshev polynomials, moment matching, and optimal estimation of the unseen. *The Annals of Statistics*, 47(2):857–883, 2019.
